# Supplementary material for: Changes in prevalence of Helicobacter pylori in Japan from 2008 to 2018: a repeated cross-sectional study
Source: PubMed Central journal article supplement — BMJ Open. 2022 Sep 8;12(9):e058774. doi: 10.1136/bmjopen-2021-058774 (PMC9462096; doi:10.1136/bmjopen-2021-058774), 2022-09-08
Supplement: bmjopen-2021-058774.draft_revisions.pdf [file bmjopen-2021-058774.draft_revisions.pdf]

# BMJ Open

BMJ Open is committed to open peer review. As part of this commitment we make the peer review history of every article we publish publicly available.

When an article is published we post the peer reviewers' comments and the authors' responses online. We also post the versions of the paper that were used during peer review. These are the versions that the peer review comments apply to.

The versions of the paper that follow are the versions that were submitted during the peer review process. They are not the versions of record or the final published versions. They should not be cited or distributed as the published version of this manuscript.

BMJ Open is an open access journal and the full, final, typeset and author-corrected version of record of the manuscript is available on our site with no access controls, subscription charges or pay-per-view fees (<http://bmjopen.bmj.com>).

If you have any questions on BMJ Open's open peer review process please email [info.bmjopen@bmj.com](mailto:info.bmjopen@bmj.com)

# BMJ Open

## Changes in prevalence of *Helicobacter pylori* in japan from 2008 to 2018: a retrospective cross-sectional study

|                               |                                                                                                                                                                                                                                                                                                                                                                                                                                                                                                                                                                                                                                                                                                                                                                                                                                                                                                                                                                           |
|-------------------------------|---------------------------------------------------------------------------------------------------------------------------------------------------------------------------------------------------------------------------------------------------------------------------------------------------------------------------------------------------------------------------------------------------------------------------------------------------------------------------------------------------------------------------------------------------------------------------------------------------------------------------------------------------------------------------------------------------------------------------------------------------------------------------------------------------------------------------------------------------------------------------------------------------------------------------------------------------------------------------|
| Journal:                      | <i>BMJ Open</i>                                                                                                                                                                                                                                                                                                                                                                                                                                                                                                                                                                                                                                                                                                                                                                                                                                                                                                                                                           |
| Manuscript ID                 | bmjopen-2021-058774                                                                                                                                                                                                                                                                                                                                                                                                                                                                                                                                                                                                                                                                                                                                                                                                                                                                                                                                                       |
| Article Type:                 | Original research                                                                                                                                                                                                                                                                                                                                                                                                                                                                                                                                                                                                                                                                                                                                                                                                                                                                                                                                                         |
| Date Submitted by the Author: | 27-Oct-2021                                                                                                                                                                                                                                                                                                                                                                                                                                                                                                                                                                                                                                                                                                                                                                                                                                                                                                                                                               |
| Complete List of Authors:     | <p>Abiko, Soichiro; Tokyo Medical University, Department of General Medicine and Primary Care<br/>         Hirayama, Yoji; Tokyo Medical University, Department of General Medicine and Primary Care<br/>         Otaki, Junji; Tokyo Medical University, Department of Medical Education; Tokyo Medical University, Department of General Medicine and Primary Care<br/>         Harada, Yoshimi; Tokyo Medical University, Department of Medical Education; Tokyo Medical University, Department of General Medicine and Primary Care<br/>         Kawakami, Kohei; Tokyo Medical University, Department of General Medicine and Primary Care<br/>         Toi, Takahiro; Tokyo Medical University, Department of General Medicine and Primary Care<br/>         Takamiya, Tomoko; Tokyo Medical University, Department of Preventive Medicine and Public Health<br/>         Kawai, Takashi; Tokyo Medical University, Department of Gastroenterological Endoscopy</p> |
| Keywords:                     | Gastrointestinal infections < GASTROENTEROLOGY, Gastrointestinal tumours < GASTROENTEROLOGY, HEALTH ECONOMICS, Health policy < HEALTH SERVICES ADMINISTRATION & MANAGEMENT, Epidemiology < INFECTIOUS DISEASES, PREVENTIVE MEDICINE                                                                                                                                                                                                                                                                                                                                                                                                                                                                                                                                                                                                                                                                                                                                       |
|                               |                                                                                                                                                                                                                                                                                                                                                                                                                                                                                                                                                                                                                                                                                                                                                                                                                                                                                                                                                                           |

SCHOLARONE™  
Manuscripts

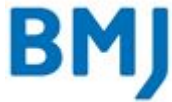

I, the Submitting Author has the right to grant and does grant on behalf of all authors of the Work (as defined in the below author licence), an exclusive licence and/or a non-exclusive licence for contributions from authors who are: i) UK Crown employees; ii) where BMJ has agreed a CC-BY licence shall apply, and/or iii) in accordance with the terms applicable for US Federal Government officers or employees acting as part of their official duties; on a worldwide, perpetual, irrevocable, royalty-free basis to BMJ Publishing Group Ltd ("BMJ") its licensees and where the relevant Journal is co-owned by BMJ to the co-owners of the Journal, to publish the Work in this journal and any other BMJ products and to exploit all rights, as set out in our [licence](#).

The Submitting Author accepts and understands that any supply made under these terms is made by BMJ to the Submitting Author unless you are acting as an employee on behalf of your employer or a postgraduate student of an affiliated institution which is paying any applicable article publishing charge ("APC") for Open Access articles. Where the Submitting Author wishes to make the Work available on an Open Access basis (and intends to pay the relevant APC), the terms of reuse of such Open Access shall be governed by a Creative Commons licence – details of these licences and which [Creative Commons](#) licence will apply to this Work are set out in our licence referred to above.

Other than as permitted in any relevant BMJ Author's Self Archiving Policies, I confirm this Work has not been accepted for publication elsewhere, is not being considered for publication elsewhere and does not duplicate material already published. I confirm all authors consent to publication of this Work and authorise the granting of this licence.

1 **Changes in prevalence of *Helicobacter pylori* in japan from 2008 to 2018: a retrospective**  
2 **cross-sectional study**

3 **Author names:** Soichiro Abiko<sup>1</sup>, Yoji Hirayama<sup>1</sup>, Junji Otaki<sup>2 1</sup>, Yoshimi Harada<sup>2 1</sup>, Kohei  
4 Kawakami<sup>1</sup>, Takahiro Toi<sup>1</sup>, Tomoko Takamiya<sup>3</sup>, Takashi Kawai<sup>4</sup>

5 **Author Affiliations:**

6 1. Department of General Medicine and Primary Care, Tokyo Medical University, Tokyo, Japan.

7 2. Department of Medical Education, Tokyo Medical University, Tokyo, Japan.

8 3. Department of Preventive Medicine and Public Health, Tokyo Medical University, Tokyo, Japan.

9 4. Department of Gastroenterological Endoscopy, Tokyo Medical University, Tokyo, Japan.

10 **Corresponding Author:** Soichiro Abiko

11 Email: s\_abiko1@tokyo-med.ac.jp

12 **Word count:** 2412

13

14 **ABSTRACT**

15 **Objectives:** To understand the recent prevalence and trends of *H. pylori* infection rates in  
16 the Japanese population.

17 **Design:** Retrospective cross-sectional study.

18 **Setting:** Japanese workers.

19 **Participants:** We included 22,120 members (age: 35–65 years) of the T company health

1  
2  
3  
4  
5 20 insurance society who underwent serum *H. pylori* antibody tests in a health checkup from  
6  
7  
8 21 2008 and 2018.

9  
10 22 **Measures:** We analyzed the *H. pylori* infection rate among participants aged 35 years from  
11  
12  
13 23 2008 to 2018 and participants aged 35, 40, 45, and 50–65 years in 2018 based on the results  
14  
15  
16 24 of serum antibody tests during the health checkups. In the 2018 analysis, we considered all  
17  
18  
19 25 participants who had undergone eradication treatment for *H. pylori* as infected, regardless of  
20  
21  
22 26 the antibody test results, to reduce the influence of previous treatment. Trend analyses were  
23  
24  
25 27 performed using Joinpoint analysis.

26 28 **Results:** *H. pylori* was detected in 1,290 out of 9,325 participants aged 35 years. The annual  
27  
28  
29 29 infection rates showed a linear downward trend (slope = -0.65) as follows: 16.6% in 2008 to  
30  
31  
32 30 10.1% in 2018. In the 2018 analysis, 2,863 out of 11,434 participants were positive for *H.*  
33  
34  
35 31 *pylori*; moreover, there was an upward trend of the infection rate with advanced age (10.8%  
36  
37 32 [35 years] to 47.3% [65 years]). The trend showed a Joinpoint, with the trend changing  
38  
39  
40 33 significantly at the age of 50 years (first trend: 35–50 years [slope = 0.57]; second trend: 50–  
41  
42  
43 34 65 years [slope = 1.51]). Although both were upward trends, the second trend was steeper (P  
44  
45 35 < 0.05).

46  
47 36 **Conclusions:** Over the last 11 years, there has been a decrease in the infection rate of *H.*  
48  
49  
50 37 *pylori* in Japanese 35–year olds. The infection rate in 2018 was high with advanced age.  
51  
52  
53 38 There is a consistent declining trend of the *H. pylori* infection rate in Japan.

1  
2  
3  
4  
5 39  
6  
78 **40 Strengths and limitations of this study**  
9

- 10 41 • We included very recent data from the general population (non-patients who underwent  
11  
12 42 medical checkups without special intentions) and applied Joinpoint trend analysis to  
13  
14  
15 43 analyze trends in the *H. pylori* infection rates in Japan.  
16  
17  
18 44 • We enrolled a large number of participants in a single group over a relatively long period.  
19  
20  
21 45 • This study suggests a trend of the infection rate of *H. pylori* using data from 35-year-olds.  
22  
23  
24 46 • In the 2018 analysis, the participants' history of eradication treatment for *H. pylori* was  
25  
26 47 determined through questionnaires.  
27  
28  
29 48 • This study has limitations regarding the possibility of group bias (including occupational,  
30  
31 49 sex ratio, and medical history).  
32  
33

34 50  
3536  
37 **51 INTRODUCTION**  
38

39 52 *Helicobacter pylori* (*H. pylori*) is a gram-negative bacterium that is often found in the human  
40  
41  
42 53 stomach. *H. pylori* is among the causes of chronic gastritis, duodenal ulcers, gastric ulcers,  
43  
44  
45 54 immune thrombocytopenia, gastric mucosa-associated lymphoid tissue lymphoma, and  
46  
47  
48 55 gastric cancer. The International Agency for Research on Cancer Working group, which is a  
49  
50  
51 56 part of the World Health Organization, classified *H. pylori* as a Group 1 carcinogen for gastric  
52  
53 57 cancer in 1994.<sup>1</sup> Moreover, they recognized eradication therapy for *H. pylori* in  
54  
55  
56  
57  
58  
59  
60

1  
2  
3  
4  
5 58 asymptomatic populations as efficient for preventing gastric cancer and recommended  
6  
7  
8 59 introducing population-based *H. pylori* screening and treatment programs.<sup>2</sup>  
9

10 60 *H. pylori* test-and-treat strategy for preventing gastric cancer is considered more  
11  
12  
13 61 effective in regions with a high incidence of gastric cancer.<sup>3</sup> The incidence and mortality  
14  
15  
16 62 rates of gastric cancer are high; moreover, *H. pylori* could be involved > 90% in Japan.<sup>4 5</sup>  
17  
18  
19 63 Additionally, the infection rate of *H. pylori* in Japan is higher than that in other developed  
20  
21  
22 64 countries.<sup>6</sup> Accordingly, the “test-and-treat” strategy for *H. pylori* could be a good measure  
23  
24  
25 65 for preventing gastric cancer in Japan. In 2013, the national health insurance scheme covered  
26  
27  
28 66 the *H. pylori* eradication therapy for chronic gastritis in Japan. Several groups in Japan,  
29  
30  
31 67 including company health insurance societies and local municipalities, have introduced *H.*  
32  
33  
34 68 *pylori* screening tests for asymptomatic people during medical check-ups for the prophylactic  
35  
36  
37 69 intervention of gastric cancer.  
38

39  
40 71 Decreasing the *H. pylori* infection rate could reduce the incidence rate of gastric  
41  
42  
43 72 cancer<sup>7</sup> and reduce the positive predictive value of *H. pylori* screening. Therefore, decreasing  
44  
45  
46 73 the *H. pylori* infection rate in the population may negatively affect the cost-effectiveness of  
47  
48  
49 74 the “test-and-treat” strategy for asymptomatic groups. It is important to elucidate the  
50  
51  
52 75 prevalence of *H. pylori* and its trends to predict the infection rate and plan future strategies.  
53  
54  
55 76 There has been a decrease in the worldwide prevalence of *H. pylori*,<sup>6</sup> with several Japanese  
56  
57  
58  
59  
60

1  
2  
3  
4  
5 77 studies reporting similar results.<sup>8</sup> However, most of these studies had small sample sizes or  
6  
7  
8 78 included specific participants, including hospital visitors, or meta-analyses. To our  
9  
10  
11 79 knowledge, there have been no recent large-scale studies on the annual prevalence and trend  
12  
13 80 of infection rates of *H. pylori* in Japan.<sup>9,8,10</sup> Additionally, several studies have reported that  
14  
15 81 the *H. pylori* infection rates become steady at approximately 10% in several low-prevalence  
16  
17  
18 82 regions, including European countries.<sup>6 11 12</sup> Watanabe et al. suggested that the declining  
19  
20  
21 83 trend of the *H. pylori* prevalence in Japan appears to become dull.<sup>10</sup> This study aimed to  
22  
23  
24 84 elucidate the recent trend in the infection rate of *H. pylori* and whether it showed a significant  
25  
26  
27 85 change.

28  
29 86 Using data from health checkups in a company health insurance society, this  
30  
31  
32 87 retrospective cross-sectional study aimed to clarify the recent 11-year trend of *H. pylori*  
33  
34  
35 88 infection rate in 35-year-olds and *H. pylori* infection rates in 2018 according to age.

36  
37 89

## 38 39 90 **MATERIALS AND METHODS**

40  
41  
42 91 Members of the T company health insurance society undergo serum anti-*Helicobacter pylori*  
43  
44  
45 92 IgG antibody tests. This test was conducted annually on members aged 35 years during their  
46  
47  
48 93 health checkups (approximately 600–1,100 people per year). However, in 2018, the society  
49  
50  
51 94 offered this test to participants aged 35, 40, 45, and > 50 years. We included members who  
52  
53  
54 95 had undergone serum *H. pylori* antibody tests at their annual health checkups from April 1,



1  
2  
3  
4  
5 96 2008, to March 31, 2019, at the age of 35–65 years. Participants' data, including medical  
6  
7  
8 97 questionnaires and blood test results, were anonymously obtained from the annual health  
9  
10  
11 98 checkup database of the health insurance society. We excluded data from individuals who  
12  
13 99 refused academic use of their data.  
14  
15

100

### 101 **Statistical analysis**

102 First, we analyzed data obtained from 35-year-old participants between 2008 and  
103 2018 to determine trends in *H. pylori* infection rates (“35-year-old analysis”), with positive  
104 results of serum antibody tests for *H. pylori* indicating *H. pylori* infection. We calculated the  
105 annual infection rates based on the antibody test results. Subsequently, we analyzed the trend  
106 of the rates. Second, we analyzed data from participants aged 35, 40, 45, and 50–65 years old  
107 obtained in 2018 according to age to determine generational differences in the infection rates  
108 (“2018 analysis”).

109 In the 2018 analysis, participants who tested positive for antibodies were considered  
110 as infected. Further, to reduce the influence of eradication treatment on the infection rate, all  
111 participants with a history of eradication treatment of *H. pylori* infection were defined as  
112 positive regardless of their tests results for *H. pylori* antibody, with the assumption that a  
113 history of eradication treatment indicates a previous infection. Similarly, we analyzed sex  
114 differences in both analyses.

1  
2  
3  
4  
5 115 We performed Joinpoint Trend Analysis<sup>13</sup> to identify trends in the infection rate and  
6  
7  
8 116 their changes over time using Joinpoint Regression Program 4.9.0.0.<sup>14</sup> Statistical significance  
9  
10  
11 117 was set at  $P < 0.05$ . We measured serum anti-*Helicobacter pylori* IgG using enzyme-linked  
12  
13 118 immunosorbent assay with E-Plate Eiken *H. pylori* antibody or E-Plate II Eiken *H. pylori*  
14  
15 119 antibody (Eiken Chemical Co. Ltd., Tokyo, Japan). The cut-off level was set at 10 U/mL,<sup>15</sup>  
16  
17  
18 120 with values above this value being classified as positive. Data with missing or ambiguous  
19  
20  
21 121 figures were excluded from the analysis.  
22  
23  
24 122

### 25 26 123 **Patient and public involvement**

27  
28  
29 124 No patients were involved in this study. T company health insurance society  
30  
31  
32 125 acknowledged the importance of this study concept and allowed the collection of the  
33  
34 126 participants' data. The results of this study are published as a report.  
35  
36  
37 127

### 38 39 128 **Ethical approval**

40  
41  
42 129 This study protocol was reviewed and approved by the Institutional Review Board of  
43  
44  
45 130 Tokyo Medical University (T2019-0044). Following the Ethical Guidelines for Medical and  
46  
47  
48 131 Health Research Involving Human Subjects,<sup>16</sup> the study information was shown on the  
49  
50  
51 132 websites of the institutions where the researchers or participants belonged. Participants'  
52  
53 133 consent for using data was obtained through an opt-out option.  
54  
55  
56  
57  
58  
59  
60

1  
2  
3  
4  
5 134  
6  
7

8 135 **RESULTS**  
9

10 136 There were 9,793 and 12,327 participants in the 35-year-old and 2018 analyses, respectively,  
11  
12  
13 137 with 592 participants overlapping in both analyses. In the 35-year-old analysis, 468  
14  
15 138 participants were excluded for having missing (n = 314) ambiguous data (n = 154) in the  
16  
17 139 records, with 9,325 participants (7,586 men; 1,739 women) being included in the final  
18  
19 140 analysis. In the 2018 analysis, 893 participants were excluded for having missing (n = 875)  
20  
21 141 ambiguous data (n = 18) in the records, with 11,434 participants (9,580 men; 1,854 women)  
22  
23 142 being included in the final analysis (Figure 1).  
24  
25  
26  
27  
28

29 143  
30

31 144  
32  
33

34 145  
35  
36  
37  
38  
39  
40  
41  
42  
43  
44  
45  
46  
47  
48  
49  
50  
51  
52  
53  
54  
55  
56  
57  
58  
59  
60

### 147 **The 35-year-old analysis**

148 In the 35-year-old analysis, 1,290 (1,100 male; 190 female) participants were *H.*  
149 *pylori*-infected. In Joinpoint analysis, infection rates showed a linear downward trend with  
150 advanced years (16.6% in 2008 to 10.1% in 2018, with a slope of -0.65 [P < 0.05]). This  
151 trend lacked a Joinpoint at which the trend significantly changed (Figure 2).

### 154 **The 2018 analysis**

155 In the 2018 analysis, 2,863 (2,432 male; 431 female) participants were infected with  
156 *H. pylori*. The infection rates showed a trend of increasing positive rates with advanced age  
157 (10.8% in 35 years to 47.3% in 65 years). This trend had a Joinpoint at the age of 50 years  
158 (95% CI: 45–57), with two different trends in the slope before and after the point. Specifically,  
159 the first and second trends were 35–50 years (slope = 0.57) and 50–65 years (slope = 1.51).  
160 Both trends showed linear upward trends with age, with the second trend being significantly  
161 steeper than the first trend (P < 0.05) (Figure 3).

### 164 **Sex difference in the trends of *H.pylori* infection rate**

165 In the 35-year-old analysis, there were no significant sex differences in terms of the  
166 trend in the infection rate. In the 2018 analysis, the infection rates in both sexes showed an

1  
2  
3  
4  
5 167 upward trend with advanced age, moreover, analysis of men, but not women, showed a  
6  
7  
8 168 Joinpoint at the age of 54 years (95% CI: 45–58 years) (Supplementary Figure 1).  
9

10 169

11  
12  
13 170

14  
15 171 **DISCUSSION**

16  
17  
18 172 This study investigated the trend in the prevalence of *H. pylori* infection in Japan based on  
19  
20  
21 173 large-scale health checkup data. In the 35-year-old analysis, the infection rate showed a linear  
22  
23  
24 174 declining trend from 2008 to 2018. This demonstrates a declining trend of the *H. pylori*  
25  
26 175 infection rate in this large Japanese general population.  
27

28  
29 176

30  
31 177 In the 35-year-old analysis, the infection rate straightforwardly reached  
32  
33  
34 178 approximately 10%; further, this downward trend did not significantly change during the  
35  
36  
37 179 observation period. In the 35-year-old analysis, the infection rates were significantly less  
38  
39  
40 180 affected by eradication treatment; therefore, this finding could well describe the trend of the  
41  
42  
43 181 incidence rate of *H. pylori* infections in Japan. If the downward trend (slope = 0.65) observed  
44  
45 182 in the 35-year-old analysis continues, the infection rate will reach nearly zero around 2035.  
46  
47  
48 183 Contrastingly, recent studies on junior high school students (age: 12–15 years) in Japan have  
49  
50  
51 184 demonstrated that the infection rate of this generation when they reach 35 years at around  
52  
53 185 2035 will be approximately 3–5%,<sup>17-20</sup> which is higher than our prediction. This  
54  
55  
56  
57  
58  
59  
60

1  
2  
3  
4  
5 186 inconsistency suggests that the decrease in the infection rate may have slowed down.  
6  
7

8 187

9  
10 188 In the 2018 analysis, the infection rate increased with advanced age; moreover, there

11  
12  
13 189 was a declining trend in the prevalence rate of *H. pylori* in the Japanese general population.

14  
15 190 Further, there was a Joinpoint at the age of 50 years, which indicates a change affecting the

16  
17  
18 191 *H. pylori* infection near this age (Figure 3). Chronic *H. pylori* infection is mostly established

19  
20  
21 192 in the human stomach during childhood.<sup>21 22</sup> Drinking water and family members are among

22  
23  
24 193 the sources of *H. pylori* infection.<sup>23</sup> From the late 1960s to the 1970s, which is when people

25  
26 194 aged 50 years in 2018 spent their childhood, Japan experienced rapid economic growth and

27  
28  
29 195 urbanization. Accordingly, there was a rapid increase in water supply penetration and a

30  
31  
32 196 decrease in the average number of households.<sup>24 25</sup> This rapid environmental change may

33  
34  
35 197 have influenced the establishment of *H. pylori* infection; consequently, there was a rapid

36  
37  
38 198 decrease in the prevalence of this bacterium during this era. Watanabe et al. revealed changes

39  
40  
41 199 in the declining trend of *H.pylori* infection rate and indicated an effect of environmental

42  
43  
44 200 changes on the infection rate,<sup>10</sup> which is consistent with our findings.

45  
46  
47 201

48  
49  
50 202 Participants in the 35-year-old analysis were born after 1973; therefore, they may

51  
52  
53 203 have not undergone rapid environmental changes as those in 1955–1972. The 35-year-old

54  
55  
56 204 analysis revealed a recent gradual decrease in the *H. pylori* infection rate. This suggests that

1  
2  
3  
4  
5 205 factors other than hygiene and family structure may influence infection establishment. As  
6  
7  
8 206 aforementioned, *H. pylori* infections are likely to be established during childhood through  
9  
10 207 parent-to-child transmission.<sup>22</sup> In addition to hygienic and environmental improvements, the  
11  
12  
13 208 spread of ready-made baby food after around 1970 may have contributed to the decreased *H.*  
14  
15 209 *pylori* infection rate.<sup>26</sup> With the recently increasing recognition of *H. pylori* in the general  
16  
17  
18 210 population and coverage of eradication treatment through national insurance, there has been  
19  
20  
21 211 an increase in the number of *H. pylori* eradication treatments in Japan.<sup>27</sup> If treatment  
22  
23  
24 212 decreases the infection rate in child-rearing generation, it could accelerate the declining speed  
25  
26 213 of the infection rates in the next generations.

27  
28  
29 214

30  
31 215 In the 2018 analysis, men, but not women, showed a Joinpoint trend. This suggests  
32  
33  
34 216 sex differences in the trend of *H. pylori* infection; however, given the sex bias in the number  
35  
36  
37 217 of participants (9580 men and 1854 women), we cannot conclude about the sex difference.  
38  
39  
40 218 This should be investigated in future studies.

41  
42 219

43  
44  
45 220 When conducting *H. pylori* screening tests for prophylactic purposes, the prevalence  
46  
47  
48 221 in a target group should be considered to evaluate the effectiveness of the strategy. We  
49  
50  
51 222 observed a decreasing infection rate of *H. pylori* in Japan. In the future, the infection rate  
52  
53 223 may reach zero; accordingly, there would be a decreased importance of screening tests for

1  
2  
3  
4  
5 224 this bacterium in asymptomatic people. A study on the cost-effectiveness of the test-and-  
6  
7  
8 225 treatment strategy for *H. pylori* revealed that it remained effective even with a low infection  
9  
10  
11 226 rate of approximately 5%.<sup>28</sup> Our findings could inform future public health strategies.  
12  
13 227 Moreover, considering the decrease in *H. pylori* prevalence, *H. pylori* infection-negative  
14  
15 228 gastric cancer has lately been receiving attention.<sup>29 30 31</sup> Research for risk factors of gastric  
16  
17  
18 229 cancer other than *H. pylori* is also needed.  
19  
20  
21 230

### 22 231 **Limitations**

23  
24  
25  
26 232 This study has several limitations. First, there might have been selective bias,  
27  
28  
29 233 including age, sex, occupation, region, and nationality (possibly including several workers  
30  
31  
32 234 who were born and raised in countries other than Japan). Several studies have analyzed  
33  
34  
35 235 differences in the infection rates according to sex, occupation, and region, with a study  
36  
37  
38 236 reporting a higher infection rate in men; however, there remains no consensus regarding these  
39  
40  
41 237 biases.<sup>32-34</sup> A recent study showed that employees in a large company are in better health than  
42  
43  
44 238 those in a small one.<sup>35</sup> The size of the target group could have yielded a bias. However, this  
45  
46  
47 239 study could have insignificant healthy candidate bias since we targeted all health society  
48  
49  
50 240 members. We could not determine the number structure of all society members, which could  
51  
52  
53 241 limit the generalization of our findings to the general population. Heterogeneity of age gaps  
54  
55  
56 242 between age groups and limitation of the target ages may have weakened analyses, especially  
57  
58  
59  
60



1  
2  
3  
4  
5 243 in younger age groups. Additionally, the history of *H. pylori* eradication may have influenced  
6  
7  
8 244 our findings. In 2008, T company insurance society performed serum *H. pylori* antibody  
9  
10 245 screening tests for all its members. Therefore, there may have been a higher proportion of  
11  
12  
13 246 post-eradication cases in our study than in the general population. We attempted to reduce  
14  
15  
16 247 the influence of eradication treatment by classifying patients who underwent eradication  
17  
18 248 treatment as infected. However, history information acquired through a self-reported  
19  
20  
21 249 questionnaire could have contained inaccuracies, including recall bias.<sup>36</sup> In the 35-year-old  
22  
23  
24 250 analysis, we could not obtain information regarding previous eradication treatment.  
25  
26 251 Moreover, we performed analysis based on the assumption that the rate of eradication  
27  
28  
29 252 treatment among participants in the 35-year-old analysis was low due to their younger age  
30  
31  
32 253 and that treatment has an insignificant influence on the infection rate. A follow-up survey of  
33  
34 254 the same society between 2018 and 2020 showed that the rate of eradication treatment was  
35  
36  
37 255 0.9%, 2.1%, and 1.4% in 2018, 2019, and 2020, respectively. Although this supports our  
38  
39  
40 256 assumption, it indicates the possibility of errors of 1%–2 % in the infection rates of the 35-  
41  
42  
43 257 year-old analysis. Additionally, previous medical history; medications; and measurement  
44  
45 258 biases, including test characteristics and threshold application in the test (including high-  
46  
47  
48 259 negative issues), could have influenced our results.<sup>37 38</sup>

260

## 261 **CONCLUSION**

1  
2  
3  
4  
5 262 Our findings demonstrated a decrease in the infection rate of *H. pylori* among 35-year-olds  
6  
7  
8 263 in Japan from 2008 to 2018. The infection rate of *H. pylori* may continue to decrease in the  
9  
10  
11 264 future. We expect the infection rate of *H. pylori* to continue decreasing, and it would be  
12  
13 265 difficult to rely solely on the *H. pylori* test and treatment strategy to achieve gastric cancer  
14  
15 266 prevention. Other risk factors of gastric cancer other than *H. pylori* should be considered.  
16  
17  
18 267

## 21 268 **Acknowledgment**

22  
23 269 We would like to acknowledge the T company health insurance society. We would like to  
24  
25  
26 270 thank Editage (www.editage.com) for the English language editing.  
27  
28

29 271

30  
31 272

## 34 273 **Footnotes**

35  
36  
37 274 **Contributors:** SA designed the study, analyzed the data, and drafted the manuscript. Y  
38  
39 275 Hirayama contributed to the study design and performed general supervision of a whole study.  
40  
41  
42 276 JO, Y Harada, and T Toi assisted in conducting the study, interpreting the results, and  
43  
44  
45 277 revising the manuscript. KK and TK contributed to data collection and provided advice and  
46  
47  
48 278 opinions from an expert perspective. TT contributed to data analysis and revising the  
49  
50 279 manuscript from statistical and public health perspectives. All authors read and approved the  
51  
52  
53 280 final manuscript.  
54  
55  
56  
57  
58  
59  
60

1  
2  
3  
4  
5 281

6  
7  
8 282 **Funding:** This research received no specific grant from any funding agency in the public,  
9  
10 283 commercial, or not-for-profit sectors.

11  
12  
13 284

14  
15 285 **Competing interests:** None declared.

16  
17  
18 286

19  
20  
21 287 **Patient consent for publication:** Not required.

22  
23  
24 288

25  
26 289 **Ethics approval:** The institutional review boards of Tokyo Medical University (T2019-  
27  
28 0044)

29  
30  
31 291

32  
33  
34 292 **Provenance and peer review:** Not commissioned; externally peer-reviewed.

35  
36  
37 293

38  
39 294 **Data sharing statement:** Data is available in a public, open access repository.

40  
41  
42 295 Figshare, <https://figshare.com/s/e94123c7270ca1e09084>,

43  
44  
45 296 DOI: 10.6084/m9.figshare.14594571, CC BY

46  
47  
48 297

49  
50  
51 298

52  
53 299 **REFERENCES**

- 1  
2  
3  
4  
5 300 1. IARC Working Group on the Evaluation of Carcinogenic Risks to Humans. Schistosomes,  
6  
7  
8 301 Liver Flukes and *Helicobacter pylori*. Lyon (FR): International Agency for Research  
9  
10 302 on Cancer 1994.
- 11  
12  
13 303 2. IARC *Helicobacter pylori* Working Group. *Helicobacter pylori* Eradication as a Strategy for  
14  
15 304 Preventing Gastric Cancer: International Agency for Research on Cancer 2014.
- 16  
17  
18 305 3. Ford AC, Forman D, Hunt RH, et al. *Helicobacter pylori* eradication therapy to prevent  
19  
20 306 gastric cancer in healthy asymptomatic infected individuals: systematic review and  
21  
22 307 meta-analysis of randomised controlled trials. *BMJ* 2014;348:g3174. doi:  
23  
24 308 10.1136/bmj.g3174
- 25  
26  
27  
28  
29 309 4. Center for Cancer Control and Information Services, National Cancer Center. CANCER  
30  
31 310 STATISTICS IN JAPAN '19 [updated 17 April 2020. Available from:  
32  
33 311 [https://ganjoho.jp/en/professional/statistics/brochure/2019\\_en.html](https://ganjoho.jp/en/professional/statistics/brochure/2019_en.html) accessed 22  
34  
35 312 Dec 2020.
- 36  
37  
38  
39 313 5. Matsuo T, Ito M, Takata S, et al. Low prevalence of *Helicobacter pylori*-negative gastric  
40  
41 314 cancer among Japanese. *Helicobacter* 2011;16(6):415-9. doi: 10.1111/j.1523-  
42  
43 315 5378.2011.00889.x [published Online First: 2011/11/09]
- 44  
45  
46  
47 316 6. Peleteiro B, Bastos A, Ferro A, et al. Prevalence of *Helicobacter pylori* infection worldwide:  
48  
49 317 a systematic review of studies with national coverage. *Dig Dis Sci* 2014;59(8):1698-  
50  
51 318 709. doi: 10.1007/s10620-014-3063-0 [published Online First: 2014/02/25]  
52  
53  
54  
55  
56  
57  
58  
59  
60

- 1  
2  
3  
4  
5 319 7. Tsuda M, Asaka M, Kato M, et al. Effect on *Helicobacter pylori* eradication therapy against  
6  
7 320 gastric cancer in Japan. *Helicobacter* 2017;22(5) doi: 10.1111/hel.12415 [published  
8  
9  
10 321 Online First: 2017/08/05]  
11  
12  
13 322 8. Wang C, Nishiyama T, Kikuchi S, et al. Changing trends in the prevalence of *H. pylori*  
14  
15 323 infection in Japan (1908-2003): a systematic review and meta-regression analysis  
16  
17  
18 324 of 170,752 individuals. *Sci Rep* 2017;7(1):15491. doi: 10.1038/s41598-017-  
19  
20  
21 325 15490-7 [published Online First: 2017/11/16]  
22  
23  
24 326 9. Inoue M. Changing epidemiology of *Helicobacter pylori* in Japan. *Gastric Cancer*  
25  
26 327 2017;20(Suppl 1):3-7. doi: 10.1007/s10120-016-0658-5 [published Online First:  
27  
28  
29 328 2016/10/21]  
30  
31  
32 329 10. Watanabe M, Ito H, Hosono S, et al. Declining trends in prevalence of *Helicobacter*  
33  
34 330 *pylori* infection by birth-year in a Japanese population. *Cancer Sci*  
35  
36  
37 331 2015;106(12):1738-43. doi: 10.1111/cas.12821 [published Online First:  
38  
39  
40 332 2015/09/24]  
41  
42  
43 333 11. Carmack SW, Genta RM. *Helicobacter pylori* seroprevalence in symptomatic veterans:  
44  
45 334 a study of 7310 patients over 11 years. *Helicobacter* 2009;14(4):298-302. doi:  
46  
47  
48 335 10.1111/j.1523-5378.2009.00693.x  
49  
50  
51 336 12. den Hoed CM, Vila AJ, Holster IL, et al. *Helicobacter pylori* and the birth cohort effect:  
52  
53 337 evidence for stabilized colonization rates in childhood. *Helicobacter*  
54  
55  
56  
57  
58  
59  
60

- 1  
2  
3  
4  
5 338 2011;16(5):405-9. doi: 10.1111/j.1523-5378.2011.00854.x [published Online  
6  
7  
8 339 First: 2011/09/20]  
9  
10 340 13. Kim HJ, Fay MP, Feuer EJ, et al. Permutation tests for joinpoint regression with  
11  
12 341 applications to cancer rates. *Stat Med* 2000;19(3):335-51. doi: 10.1002/(sici)1097-  
13  
14 342 0258(20000215)19:3<335::aid-sim336>3.0.co;2-z [published Online First:  
15  
16 343 2000/01/29]  
17  
18  
19  
20 344 14. Joinpoint Regression Program [program]. Version 4.9.0.0 version: Statistical  
21  
22 345 Methodology and Applications Branch, Surveillance Research Program, National  
23  
24 346 Cancer Institute., March 2021.  
25  
26  
27  
28 347 15. Komatsu Y, Sugiyama T, Asaka M. Helicobacter pylori kansenshinden ni okeru  
29  
30 348 nihonjinkabu wo siyou sita ELISA kit " E-plate eiken H.pylori koutai" no yuyousei no  
31  
32 349 kentou [Study of effectiveness of E-plate eiken which is ELAISA kit using Japanese  
33  
34 350 strain in diagnose of Helicobacter pylori infection]. *The Journal of Clinical Laboratory*  
35  
36 351 *Instruments and Reagents* 2001;24(5):331-35.  
37  
38  
39  
40 352 16. Ministry of Health, Labour and Welfare. Ethical Guidelines for Medical and Health  
41  
42 353 Research Involving Human Subjects 2015 [Available from:  
43  
44 354 [https://www.mhlw.go.jp/file/06-Seisakujouhou-10600000-](https://www.mhlw.go.jp/file/06-Seisakujouhou-10600000-Daijinkanboukouseikagakuka/0000080278.pdf)  
45  
46 355 [Daijinkanboukouseikagakuka/0000080278.pdf](https://www.mhlw.go.jp/file/06-Seisakujouhou-10600000-Daijinkanboukouseikagakuka/0000080278.pdf) accessed 6 Dec 2020.  
47  
48  
49  
50  
51  
52 356 17. Kusano C, Gotoda T, Ishikawa H, et al. The administrative project of Helicobacter pylori  
53  
54  
55  
56  
57  
58  
59  
60

- 1  
2  
3  
4  
5 357 infection screening among junior high school students in an area of Japan with a  
6  
7  
8 358 high incidence of gastric cancer. *Gastric Cancer* 2017;20(Suppl 1):16-19. doi:  
9  
10 359 10.1007/s10120-017-0688-7 [published Online First: 2017/01/18]  
11  
12  
13 360 18. Honma H, Nakayama Y, Kato S, et al. Clinical features of *Helicobacter pylori* antibody-  
14  
15 361 positive junior high school students in Nagano Prefecture, Japan. *Helicobacter*  
16  
17  
18 362 2018:e12559. doi: 10.1111/hel.12559 [published Online First: 2018/12/06]  
19  
20  
21 363 19. Nakayama Y, Lin Y, Hongo M, et al. *Helicobacter pylori* infection and its related factors  
22  
23 364 in junior high school students in Nagano Prefecture, Japan. *Helicobacter* 2017;22(2)  
24  
25  
26 365 doi: 10.1111/hel.12363 [published Online First: 2016/10/28]  
27  
28  
29 366 20. Kakiuchi T, Matsuo M, Endo H, et al. A *Helicobacter pylori* screening and treatment  
30  
31 367 program to eliminate gastric cancer among junior high school students in Saga  
32  
33  
34 368 Prefecture: a preliminary report. *J Gastroenterol* 2019 doi: 10.1007/s00535-019-  
35  
36  
37 369 01559-9 [published Online First: 2019/02/17]  
38  
39  
40 370 21. Banatvala N, Mayo K, Megraud F, et al. The cohort effect and *Helicobacter pylori*. *J*  
41  
42 371 *Infect Dis* 1993;168(1):219-21. doi: 10.1093/infdis/168.1.219  
43  
44  
45 372 22. O'Ryan ML, Lucero Y, Rabello M, et al. Persistent and transient *Helicobacter pylori*  
46  
47 373 infections in early childhood. *Clin Infect Dis* 2015;61(2):211-8. doi:  
48  
49  
50 374 10.1093/cid/civ256  
51  
52  
53 375 23. Ueda M, Kikuchi S, Kasugai T, et al. *Helicobacter pylori* risk associated with childhood  
54  
55  
56  
57  
58  
59  
60

- 1  
2  
3  
4  
5 376 home environment. *Cancer Sci* 2003;94(10):914-8. doi: 10.1111/j.1349-  
6  
7  
8 377 7006.2003.tb01375.x [published Online First: 2003/10/15]  
9  
10 378 24. JAPAN WATER WORKS ASSOCIATION. Water Supply in Japan 2017 [Available from:  
11  
12  
13 379 [http://www.jwwa.or.jp/jigyoku/kaigai\\_file/2017WaterSupplyInJapan.pdf](http://www.jwwa.or.jp/jigyoku/kaigai_file/2017WaterSupplyInJapan.pdf) accessed  
14  
15 380 Dec 22 2020.  
16  
17  
18 381 25. Ministry of Health, Labour and Welfare. General Welfare and Labour Japan [Available  
19  
20  
21 382 from: <https://www.mhlw.go.jp/english/wp/wp-hw9/dl/01e.pdf> accessed 1st Oct  
22  
23 383 2020.  
24  
25  
26 384 26. Council JBF. Seisan Tokei [Production statistics] Japan [Available from:  
27  
28  
29 385 <https://www.baby-food.jp/link/ayumi-jikei.html> accessed 11 Dec 2020.  
30  
31  
32 386 27. Hiroi S, Sugano K, Tanaka S, et al. Impact of health insurance coverage for *Helicobacter*  
33  
34 387 *pylori* gastritis on the trends in eradication therapy in Japan: retrospective  
35  
36 388 observational study and simulation study based on real-world data. *BMJ Open*  
37  
38  
39 389 2017;7(7):e015855. doi: 10.1136/bmjopen-2017-015855 [published Online First:  
40  
41  
42 390 2017/08/02]  
43  
44  
45 391 28. Kowada A. Cost-effectiveness of *Helicobacter pylori* screening followed by eradication  
46  
47 392 treatment for employees in Japan. *Epidemiol Infect* 2018;146(14):1834-40. doi:  
48  
49  
50 393 10.1017/S095026881800208X [published Online First: 2018/07/31]  
51  
52  
53 394 29. Kato S, Matsukura N, Tsukada K, et al. *Helicobacter pylori* infection-negative gastric  
54  
55  
56  
57  
58  
59  
60



- 1  
2  
3  
4  
5 395 cancer in Japanese hospital patients: Incidence and pathological characteristics.  
6  
7 396 *Cancer Sci* 2007;98(6):790-94. doi: <https://doi.org/10.1111/j.1349->  
8  
9 397 7006.2007.00478.x  
10  
11  
12  
13 398 30. Yamamoto Y, Fujisaki J, Omae M, et al. Helicobacter pylori-negative gastric cancer:  
14  
15 399 characteristics and endoscopic findings. *Digestive endoscopy : official journal of the*  
16  
17 400 *Japan Gastroenterological Endoscopy Society* 2015;27(5):551-61. doi:  
18  
19 401 10.1111/den.12471 [published Online First: 2015/03/27]  
20  
21  
22  
23 402 31. Takita M, Ohata K, Inamoto R, et al. Endoscopic and histological features of Helicobacter  
24  
25 403 pylori-negative differentiated gastric adenocarcinoma arising in the antrum. *JGH*  
26  
27 404 *open : an open access journal of gastroenterology and hepatology* 2021;5(4):470-  
28  
29 405 77. doi: 10.1002/jgh3.12518 [published Online First: 2021/04/17]  
30  
31  
32  
33  
34 406 32. Kheyre H, Morais S, Ferro A, et al. The occupational risk of Helicobacter pylori infection:  
35  
36 407 a systematic review. *Int Arch Occup Environ Health* 2018;91(6):657-74. doi:  
37  
38 408 10.1007/s00420-018-1315-6  
39  
40  
41  
42 409 33. Ueda J, Gosho M, Inui Y, et al. Prevalence of Helicobacter pylori infection by birth year  
43  
44 410 and geographic area in Japan. *Helicobacter* 2014;19(2):105-10. doi:  
45  
46 411 10.1111/hel.12110 [published Online First: 2014/02/11]  
47  
48  
49  
50 412 34. Ferro A, Morais S, Pelucchi C, et al. Sex differences in the prevalence of Helicobacter  
51  
52 413 pylori infection: an individual participant data pooled analysis (StoP Project). *Eur J*

1  
2  
3  
4  
5 414 *Gastroenterol Hepatol* 2019;31(5):593-98. doi: 10.1097/MEG.0000000000001389

6  
7  
8 415 [published Online First: 2019/03/07]

9  
10 416 35. Kanamori S, Tsuji T, Takamiya T, et al. Size of company of the longest-held job and

11  
12  
13 417 mortality in older Japanese adults: A 6-year follow-up study from the Japan

14  
15  
16 418 Gerontological Evaluation Study. *J Occup Health* 2020;62(1):e12115. doi:

17  
18 419 10.1002/1348-9585.12115 [published Online First: 2020/06/10]

19  
20  
21 420 36. Coughlin SS. Recall bias in epidemiologic studies. *J Clin Epidemiol* 1990;43(1):87-91.

22  
23  
24 421 doi: 10.1016/0895-4356(90)90060-3

25  
26 422 37. Miftahussurur M, Yamaoka Y. Diagnostic Methods of Helicobacter pylori Infection for

27  
28  
29 423 Epidemiological Studies: Critical Importance of Indirect Test Validation. *BioMed*

30  
31  
32 424 *research international* 2016;2016:4819423. doi: 10.1155/2016/4819423

33  
34  
35 425 [published Online First: 2016/02/24]

36  
37 426 38. Inoue M, Sawada N, Goto A, et al. High-Negative Anti-Helicobacter pylori IgG Antibody

38  
39  
40 427 Titers and Long-Term Risk of Gastric Cancer: Results from a Large-Scale Population-

41  
42  
43 428 Based Cohort Study in Japan. *Cancer Epidemiol Biomarkers Prev* 2020;29(2):420-

44  
45 429 26. doi: 10.1158/1055-9965.EPI-19-0993 [published Online First: 2019/12/13]

46  
47 430

48  
49  
50 431

51  
52  
53 432 **FIGURE LEGENDS**

54  
55 433 **Figure 1**

1  
2  
3  
4  
5 434 *Numbers of participants*

6  
7  
8 435

9  
10 436 *Note.* (a) The 35-year-old analysis: participants aged 35 years from 2008 to 2018. (b) The  
11  
12  
13 437 2018 analysis: participants aged 35–65 years in 2018.

14  
15  
16 438

17  
18 439 **Figure 2**

19  
20 440 *Infection rates of Helicobacter pylori at 35 years old from 2008 to 2018 (n = 9,325)*

21  
22  
23 441

24  
25 442 *Note.* Infection rates at 35 years linearly decreased from 16.6% in 2008 to 10.1% in 2018,  
26  
27  
28 443 with a slope of -0.65. There was no Joinpoint. “\*” in the graph legend indicates a  
29  
30 444 significant difference in the slope from zero at the alpha = 0.05 level.

31  
32  
33 445

34  
35 446 **Figure 3**

36 447 *Infection rates of Helicobacter pylori according to age in 2018 (n = 11,434)*

37  
38 448

39  
40 449 *Note.* Infection rates increased in two trends: 10.8% at 35 years to 18.2% at 50 years with a  
41  
42 450 slope of 0.57; 18.2% at 50 years to 47.3% at 65 years old with a slope of 1.51. There was a  
43  
44  
45 451 Joinpoint at the age of 50 years. “\*” in the graph legend indicates a significant difference in  
46  
47  
48 452 the slope from zero at the alpha = 0.05 level.

49  
50 453

51  
52 454 **Supplementary Figure 1**

53 455 *Sex difference in the trends of Helicobacter pylori infection rate in 2018*

54  
55 456

1  
2  
3  
4  
5 457 *Note.* The two graphs show trends of *the H. pylori* positive rate according to age in 2018 in  
6  
7  
8 458 men and women. There were two trends and Joinpoint in men aged 54 years but not in women.  
9  
10 459 “\*” in the graph legend indicates a significant difference in the slope from zero at the alpha  
11  
12  
13 460 = 0.05 level.  
14  
15

16 461  
17  
18  
19  
20  
21  
22  
23  
24  
25  
26  
27  
28  
29  
30  
31  
32  
33  
34  
35  
36  
37  
38  
39  
40  
41  
42  
43  
44  
45  
46  
47  
48  
49  
50  
51  
52  
53  
54  
55  
56  
57  
58  
59  
60

For peer review only

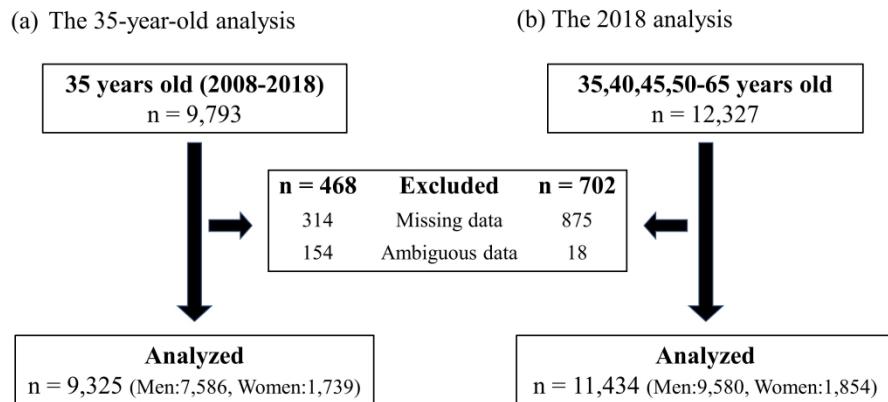

Figure 1: *Note.* (a) The 35-year-old analysis: participants aged 35 years from 2008 to 2018. (b) The 2018 analysis: participants aged 35–65 years in 2018.

338x190mm (300 x 300 DPI)

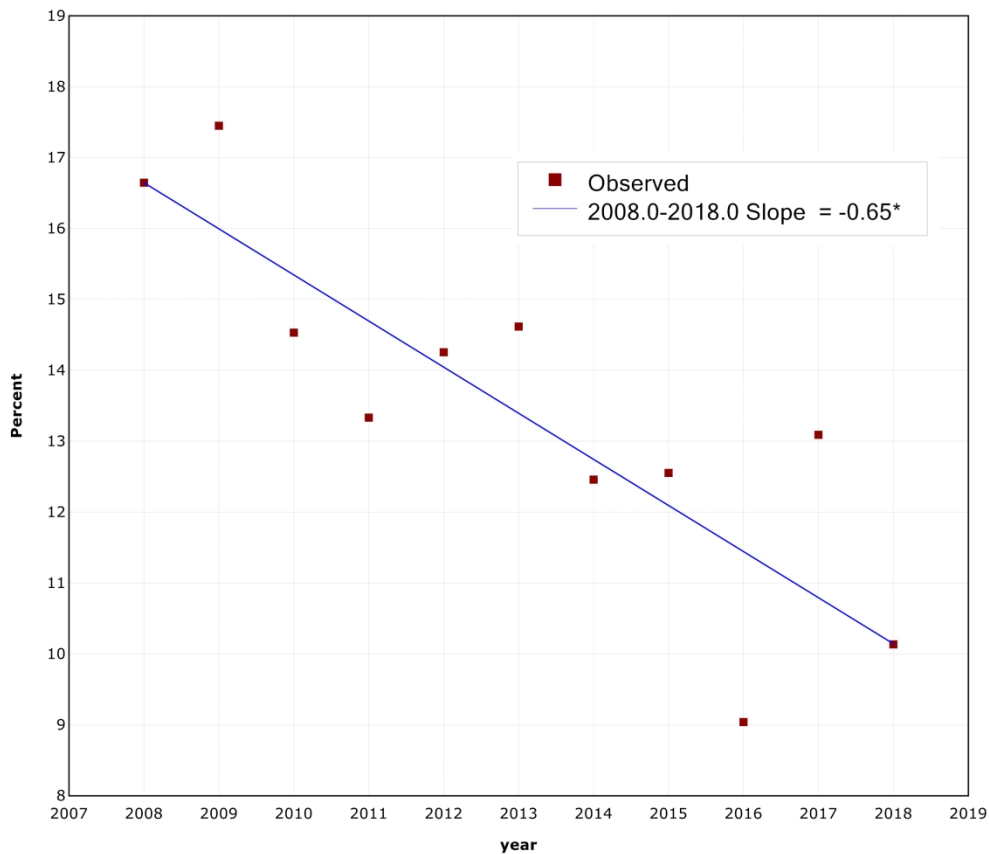

Note. Infection rates at 35 years linearly decreased from 16.6% in 2008 to 10.1% in 2018, with a slope of -0.65. There was no Joinpoint. "\*" in the graph legend indicates a significant difference in the slope from zero at the alpha = 0.05 level.

141x122mm (600 x 600 DPI)

1  
2  
3  
4  
5  
6  
7  
8  
9  
10  
11  
12  
13  
14  
15  
16  
17  
18  
19  
20  
21  
22  
23  
24  
25  
26  
27  
28  
29  
30  
31  
32  
33  
34  
35  
36  
37  
38  
39  
40  
41  
42  
43  
44  
45  
46  
47  
48  
49  
50  
51  
52  
53  
54  
55  
56  
57  
58  
59  
60

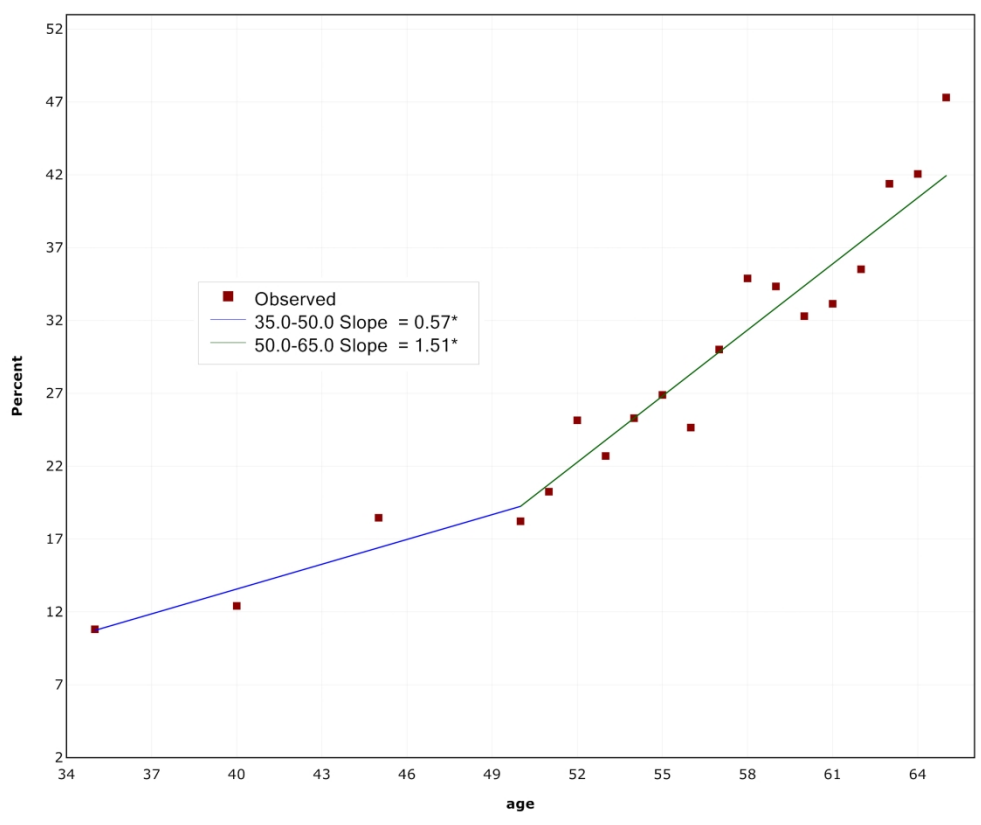

Note. Infection rates increased in two trends: 10.8% at 35 years to 18.2% at 50 years with a slope of 0.57; 18.2% at 50 years to 47.3% at 65 years old with a slope of 1.51. There was a Joinpoint at the age of 50 years. "\*" in the graph legend indicates a significant difference in the slope from zero at the alpha = 0.05 level.

126x104mm (600 x 600 DPI)

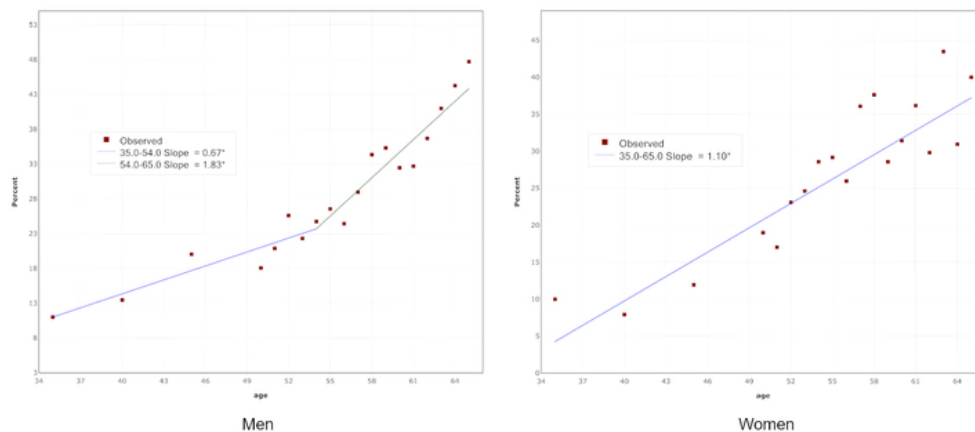

Note. The two graphs show trends of the *H. pylori* positive rate according to age in 2018 in men and women. There were two trends and Joinpoint in men aged 54 years but not in women. "\*" in the graph legend indicates a significant difference in the slope from zero at the alpha = 0.05 level.

30x13mm (600 x 600 DPI)



# Reporting checklist for cross sectional study.

Based on the STROBE cross sectional guidelines.

## Instructions to authors

Complete this checklist by entering the page numbers from your manuscript where readers will find each of the items listed below.

Your article may not currently address all the items on the checklist. Please modify your text to include the missing information. If you are certain that an item does not apply, please write "n/a" and provide a short explanation.

Upload your completed checklist as an extra file when you submit to a journal.

In your methods section, say that you used the STROBE cross sectional reporting guidelines, and cite them as:

von Elm E, Altman DG, Egger M, Pocock SJ, Gotsche PC, Vandembroucke JP. The Strengthening the Reporting of Observational Studies in Epidemiology (STROBE) Statement: guidelines for reporting observational studies.

|                           |                     |                                                                                    | Page   |
|---------------------------|---------------------|------------------------------------------------------------------------------------|--------|
|                           |                     | Reporting Item                                                                     | Number |
| <b>Title and abstract</b> |                     |                                                                                    |        |
| Title                     | <a href="#">#1a</a> | Indicate the study's design with a commonly used term in the title or the abstract | 1      |
| Abstract                  | <a href="#">#1b</a> | Provide in the abstract an informative and balanced summary                        | 1-2    |

of what was done and what was found

## Introduction

|                           |                    |                                                                                      |     |
|---------------------------|--------------------|--------------------------------------------------------------------------------------|-----|
| Background /<br>rationale | <a href="#">#2</a> | Explain the scientific background and rationale for the investigation being reported | 3-5 |
| Objectives                | <a href="#">#3</a> | State specific objectives, including any prespecified hypotheses                     | 5   |

## Methods

|                               |                     |                                                                                                                                                                                                                                                                      |       |
|-------------------------------|---------------------|----------------------------------------------------------------------------------------------------------------------------------------------------------------------------------------------------------------------------------------------------------------------|-------|
| Study design                  | <a href="#">#4</a>  | Present key elements of study design early in the paper                                                                                                                                                                                                              | 5-7   |
| Setting                       | <a href="#">#5</a>  | Describe the setting, locations, and relevant dates, including periods of recruitment, exposure, follow-up, and data collection                                                                                                                                      | 5-6   |
| Eligibility criteria          | <a href="#">#6a</a> | Give the eligibility criteria, and the sources and methods of selection of participants.                                                                                                                                                                             | 5-6   |
|                               | <a href="#">#7</a>  | Clearly define all outcomes, exposures, predictors, potential confounders, and effect modifiers. Give diagnostic criteria, if applicable                                                                                                                             | 6-7   |
| Data sources /<br>measurement | <a href="#">#8</a>  | For each variable of interest give sources of data and details of methods of assessment (measurement). Describe comparability of assessment methods if there is more than one group. Give information separately for for exposed and unexposed groups if applicable. | 6-7   |
| Bias                          | <a href="#">#9</a>  | Describe any efforts to address potential sources of bias                                                                                                                                                                                                            | 13-14 |
| Study size                    | <a href="#">#10</a> | Explain how the study size was arrived at                                                                                                                                                                                                                            | n/a   |

|    |                  |                      |                                                                   |          |
|----|------------------|----------------------|-------------------------------------------------------------------|----------|
| 1  | Quantitative     | <a href="#">#11</a>  | Explain how quantitative variables were handled in the            | n/a      |
| 2  |                  |                      |                                                                   |          |
| 3  | variables        |                      | analyses. If applicable, describe which groupings were chosen,    |          |
| 4  |                  |                      |                                                                   |          |
| 5  |                  |                      | and why                                                           |          |
| 6  |                  |                      |                                                                   |          |
| 7  |                  |                      |                                                                   |          |
| 8  |                  |                      |                                                                   |          |
| 9  | Statistical      | <a href="#">#12a</a> | Describe all statistical methods, including those used to control | 6-7      |
| 10 |                  |                      |                                                                   |          |
| 11 | methods          |                      | for confounding                                                   |          |
| 12 |                  |                      |                                                                   |          |
| 13 |                  |                      |                                                                   |          |
| 14 | Statistical      | <a href="#">#12b</a> | Describe any methods used to examine subgroups and                | 6-7      |
| 15 |                  |                      |                                                                   |          |
| 16 | methods          |                      | interactions                                                      |          |
| 17 |                  |                      |                                                                   |          |
| 18 |                  |                      |                                                                   |          |
| 19 | Statistical      | <a href="#">#12c</a> | Explain how missing data were addressed                           | 7        |
| 20 |                  |                      |                                                                   |          |
| 21 | methods          |                      |                                                                   |          |
| 22 |                  |                      |                                                                   |          |
| 23 |                  |                      |                                                                   |          |
| 24 |                  |                      |                                                                   |          |
| 25 | Statistical      | <a href="#">#12d</a> | If applicable, describe analytical methods taking account of      | n/a      |
| 26 |                  |                      |                                                                   |          |
| 27 | methods          |                      | sampling strategy                                                 |          |
| 28 |                  |                      |                                                                   |          |
| 29 |                  |                      |                                                                   |          |
| 30 | Statistical      | <a href="#">#12e</a> | Describe any sensitivity analyses                                 | n/a      |
| 31 |                  |                      |                                                                   |          |
| 32 | methods          |                      |                                                                   |          |
| 33 |                  |                      |                                                                   |          |
| 34 |                  |                      |                                                                   |          |
| 35 |                  |                      |                                                                   |          |
| 36 | <b>Results</b>   |                      |                                                                   |          |
| 37 |                  |                      |                                                                   |          |
| 38 |                  |                      |                                                                   |          |
| 39 | Participants     | <a href="#">#13a</a> | Report numbers of individuals at each stage of study—eg           | 8-9      |
| 40 |                  |                      |                                                                   |          |
| 41 |                  |                      | numbers potentially eligible, examined for eligibility, confirmed |          |
| 42 |                  |                      |                                                                   |          |
| 43 |                  |                      | eligible, included in the study, completing follow-up, and        |          |
| 44 |                  |                      |                                                                   |          |
| 45 |                  |                      | analysed. Give information separately for for exposed and         |          |
| 46 |                  |                      |                                                                   |          |
| 47 |                  |                      | unexposed groups if applicable.                                   |          |
| 48 |                  |                      |                                                                   |          |
| 49 |                  |                      |                                                                   |          |
| 50 |                  |                      |                                                                   |          |
| 51 | Participants     | <a href="#">#13b</a> | Give reasons for non-participation at each stage                  | 8        |
| 52 |                  |                      |                                                                   |          |
| 53 |                  |                      |                                                                   |          |
| 54 | Participants     | <a href="#">#13c</a> | Consider use of a flow diagram                                    | 8        |
| 55 |                  |                      |                                                                   |          |
| 56 |                  |                      |                                                                   |          |
| 57 | Descriptive data | <a href="#">#14a</a> | Give characteristics of study participants (eg demographic,       | 5-6, 13- |
| 58 |                  |                      |                                                                   |          |
| 59 |                  |                      |                                                                   |          |
| 60 |                  |                      |                                                                   |          |

clinical, social) and information on exposures and potential confounders. Give information separately for exposed and unexposed groups if applicable.

|    |                   |                                                                   |       |
|----|-------------------|-------------------------------------------------------------------|-------|
| 1  |                   |                                                                   | 14    |
| 2  |                   |                                                                   |       |
| 3  |                   |                                                                   |       |
| 4  |                   |                                                                   |       |
| 5  |                   |                                                                   |       |
| 6  |                   |                                                                   |       |
| 7  |                   |                                                                   |       |
| 8  | Descriptive data  | <a href="#">#14b</a>                                              | 8-9   |
| 9  |                   | Indicate number of participants with missing data for each        |       |
| 10 |                   | variable of interest                                              |       |
| 11 |                   |                                                                   |       |
| 12 |                   |                                                                   |       |
| 13 | Outcome data      | <a href="#">#15</a>                                               | 8-9   |
| 14 |                   | Report numbers of outcome events or summary measures.             |       |
| 15 |                   | Give information separately for exposed and unexposed             |       |
| 16 |                   | groups if applicable.                                             |       |
| 17 |                   |                                                                   |       |
| 18 |                   |                                                                   |       |
| 19 |                   |                                                                   |       |
| 20 |                   |                                                                   |       |
| 21 | Main results      | <a href="#">#16a</a>                                              | 8-9   |
| 22 |                   | Give unadjusted estimates and, if applicable, confounder-         |       |
| 23 |                   | adjusted estimates and their precision (eg, 95% confidence        |       |
| 24 |                   | interval). Make clear which confounders were adjusted for and     |       |
| 25 |                   | why they were included                                            |       |
| 26 |                   |                                                                   |       |
| 27 |                   |                                                                   |       |
| 28 |                   |                                                                   |       |
| 29 |                   |                                                                   |       |
| 30 |                   |                                                                   |       |
| 31 | Main results      | <a href="#">#16b</a>                                              | n/a   |
| 32 |                   | Report category boundaries when continuous variables were         |       |
| 33 |                   | categorized                                                       |       |
| 34 |                   |                                                                   |       |
| 35 |                   |                                                                   |       |
| 36 | Main results      | <a href="#">#16c</a>                                              | n/a   |
| 37 |                   | If relevant, consider translating estimates of relative risk into |       |
| 38 |                   | absolute risk for a meaningful time period                        |       |
| 39 |                   |                                                                   |       |
| 40 |                   |                                                                   |       |
| 41 |                   |                                                                   |       |
| 42 | Other analyses    | <a href="#">#17</a>                                               | 9-10  |
| 43 |                   | Report other analyses done—e.g., analyses of subgroups and        |       |
| 44 |                   | interactions, and sensitivity analyses                            |       |
| 45 |                   |                                                                   |       |
| 46 |                   |                                                                   |       |
| 47 | <b>Discussion</b> |                                                                   |       |
| 48 |                   |                                                                   |       |
| 49 |                   |                                                                   |       |
| 50 | Key results       | <a href="#">#18</a>                                               | 10    |
| 51 |                   | Summarise key results with reference to study objectives          |       |
| 52 |                   |                                                                   |       |
| 53 | Limitations       | <a href="#">#19</a>                                               | 13-14 |
| 54 |                   | Discuss limitations of the study, taking into account sources of  |       |
| 55 |                   | potential bias or imprecision. Discuss both direction and         |       |
| 56 |                   | magnitude of any potential bias.                                  |       |
| 57 |                   |                                                                   |       |
| 58 |                   |                                                                   |       |
| 59 |                   |                                                                   |       |
| 60 |                   |                                                                   |       |

|    |                          |                     |                                                                      |       |
|----|--------------------------|---------------------|----------------------------------------------------------------------|-------|
| 1  | Interpretation           | <a href="#">#20</a> | Give a cautious overall interpretation considering objectives,       | 10-14 |
| 2  |                          |                     | limitations, multiplicity of analyses, results from similar studies, |       |
| 3  |                          |                     | and other relevant evidence.                                         |       |
| 4  |                          |                     |                                                                      |       |
| 5  |                          |                     |                                                                      |       |
| 6  |                          |                     |                                                                      |       |
| 7  |                          |                     |                                                                      |       |
| 8  |                          |                     |                                                                      |       |
| 9  | Generalisability         | <a href="#">#21</a> | Discuss the generalisability (external validity) of the study        | 13    |
| 10 |                          |                     | results                                                              |       |
| 11 |                          |                     |                                                                      |       |
| 12 |                          |                     |                                                                      |       |
| 13 |                          |                     |                                                                      |       |
| 14 | <b>Other Information</b> |                     |                                                                      |       |
| 15 |                          |                     |                                                                      |       |
| 16 |                          |                     |                                                                      |       |
| 17 | Funding                  | <a href="#">#22</a> | Give the source of funding and the role of the funders for the       | 16    |
| 18 |                          |                     | present study and, if applicable, for the original study on which    |       |
| 19 |                          |                     | the present article is based                                         |       |
| 20 |                          |                     |                                                                      |       |
| 21 |                          |                     |                                                                      |       |
| 22 |                          |                     |                                                                      |       |
| 23 |                          |                     |                                                                      |       |
| 24 |                          |                     |                                                                      |       |

25 The STROBE checklist is distributed under the terms of the Creative Commons Attribution License  
26 CC-BY. This checklist was completed on 20. September 2021 using <https://www.goodreports.org/>, a  
27 tool made by the [EQUATOR Network](#) in collaboration with [Penelope.ai](#)  
28  
29  
30  
31  
32  
33  
34  
35  
36  
37  
38  
39  
40  
41  
42  
43  
44  
45  
46  
47  
48  
49  
50  
51  
52  
53  
54  
55  
56  
57  
58  
59  
60

# BMJ Open

## Changes in prevalence of *Helicobacter pylori* in Japan from 2008 to 2018: a repeated cross-sectional study

|                                 |                                                                                                                                                                                                                                                                                                                                                                                                                                                                                                                                                                                                                                                                                                                                                                                                                                                                                              |
|---------------------------------|----------------------------------------------------------------------------------------------------------------------------------------------------------------------------------------------------------------------------------------------------------------------------------------------------------------------------------------------------------------------------------------------------------------------------------------------------------------------------------------------------------------------------------------------------------------------------------------------------------------------------------------------------------------------------------------------------------------------------------------------------------------------------------------------------------------------------------------------------------------------------------------------|
| Journal:                        | <i>BMJ Open</i>                                                                                                                                                                                                                                                                                                                                                                                                                                                                                                                                                                                                                                                                                                                                                                                                                                                                              |
| Manuscript ID                   | bmjopen-2021-058774.R1                                                                                                                                                                                                                                                                                                                                                                                                                                                                                                                                                                                                                                                                                                                                                                                                                                                                       |
| Article Type:                   | Original research                                                                                                                                                                                                                                                                                                                                                                                                                                                                                                                                                                                                                                                                                                                                                                                                                                                                            |
| Date Submitted by the Author:   | 14-Jul-2022                                                                                                                                                                                                                                                                                                                                                                                                                                                                                                                                                                                                                                                                                                                                                                                                                                                                                  |
| Complete List of Authors:       | Abiko, Soichiro; Tokyo Medical University, Department of General Medicine and Primary Care<br>Hirayama, Yoji; Tokyo Medical University, Department of General Medicine and Primary Care<br>Otaki, Junji; Tokyo Medical University, Department of Medical Education; Tokyo Medical University, Department of General Medicine and Primary Care<br>Harada, Yoshimi; Tokyo Medical University, Department of Medical Education; Tokyo Medical University, Department of General Medicine and Primary Care<br>Kawakami, Kohei; Tokyo Medical University, Department of General Medicine and Primary Care<br>Toi, Takahiro; Tokyo Medical University, Department of General Medicine and Primary Care<br>Takamiya, Tomoko; Tokyo Medical University, Department of Preventive Medicine and Public Health<br>Kawai, Takashi; Tokyo Medical University, Department of Gastroenterological Endoscopy |
| <b>Primary Subject Heading</b>: | Epidemiology                                                                                                                                                                                                                                                                                                                                                                                                                                                                                                                                                                                                                                                                                                                                                                                                                                                                                 |
| Secondary Subject Heading:      | Infectious diseases, Gastroenterology and hepatology, Health policy                                                                                                                                                                                                                                                                                                                                                                                                                                                                                                                                                                                                                                                                                                                                                                                                                          |
| Keywords:                       | Gastrointestinal infections < GASTROENTEROLOGY, Gastrointestinal tumours < GASTROENTEROLOGY, HEALTH ECONOMICS, Health policy < HEALTH SERVICES ADMINISTRATION & MANAGEMENT, Epidemiology < INFECTIOUS DISEASES, PREVENTIVE MEDICINE                                                                                                                                                                                                                                                                                                                                                                                                                                                                                                                                                                                                                                                          |
|                                 |                                                                                                                                                                                                                                                                                                                                                                                                                                                                                                                                                                                                                                                                                                                                                                                                                                                                                              |

SCHOLARONE™  
Manuscripts

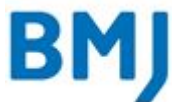

I, the Submitting Author has the right to grant and does grant on behalf of all authors of the Work (as defined in the below author licence), an exclusive licence and/or a non-exclusive licence for contributions from authors who are: i) UK Crown employees; ii) where BMJ has agreed a CC-BY licence shall apply, and/or iii) in accordance with the terms applicable for US Federal Government officers or employees acting as part of their official duties; on a worldwide, perpetual, irrevocable, royalty-free basis to BMJ Publishing Group Ltd ("BMJ") its licensees and where the relevant Journal is co-owned by BMJ to the co-owners of the Journal, to publish the Work in this journal and any other BMJ products and to exploit all rights, as set out in our [licence](#).

The Submitting Author accepts and understands that any supply made under these terms is made by BMJ to the Submitting Author unless you are acting as an employee on behalf of your employer or a postgraduate student of an affiliated institution which is paying any applicable article publishing charge ("APC") for Open Access articles. Where the Submitting Author wishes to make the Work available on an Open Access basis (and intends to pay the relevant APC), the terms of reuse of such Open Access shall be governed by a Creative Commons licence – details of these licences and which [Creative Commons](#) licence will apply to this Work are set out in our licence referred to above.

Other than as permitted in any relevant BMJ Author's Self Archiving Policies, I confirm this Work has not been accepted for publication elsewhere, is not being considered for publication elsewhere and does not duplicate material already published. I confirm all authors consent to publication of this Work and authorise the granting of this licence.

1  
2  
3  
4  
5 1 **Changes in prevalence of *Helicobacter pylori* in Japan from 2008 to 2018: a repeated**  
6  
7  
8 2 **cross-sectional study**

9  
10 3 **Author names:** Soichiro Abiko<sup>1</sup>, Yoji Hirayama<sup>1</sup>, Junji Otaki<sup>2 1</sup>, Yoshimi Harada<sup>2 1</sup>, Kohei  
11  
12  
13 4 Kawakami<sup>1</sup>, Takahiro Toi<sup>1</sup>, Tomoko Takamiya<sup>3</sup>, Takashi Kawai<sup>4</sup>

14  
15  
16 5 **Author Affiliations:**

- 17  
18 6 1. Department of General Medicine and Primary Care, Tokyo Medical University, Tokyo,  
19  
20  
21 7 Japan.  
22  
23 8 2. Department of Medical Education, Tokyo Medical University, Tokyo, Japan.  
24  
25  
26 9 3. Department of Preventive Medicine and Public Health, Tokyo Medical University, Tokyo,  
27  
28  
29 10 Japan.  
30  
31 11 4. Department of Gastroenterological Endoscopy, Tokyo Medical University, Tokyo, Japan.  
32  
33

34 12 **Corresponding Author:** Soichiro Abiko

35  
36  
37 13 Email: s\_abiko1@tokyo-med.ac.jp  
38

39  
40 14 **Word count:** 2,919  
41

42 15  
43  
44

45 16 **ABSTRACT**

46  
47 17 **Objectives:** To understand the recent prevalence and time-trends of *Helicobacter pylori*  
48  
49  
50 18 infection rates in the Japanese population.  
51

52  
53 19 **Design:** Repeated cross-sectional study  
54  
55  
56  
57  
58  
59  
60



1  
2  
3  
4  
5 20 **Participants:** A total of 22,120 workers (age: 35–65 years) from one Japanese company,  
6  
7  
8 21 who underwent serum *H. pylori* antibody tests in a health checkup between 2008 and 2018.  
9

10 22 **Measures:** *H. pylori* infection rates among participants aged 35 years from 2008 to 2018,  
11  
12  
13 23 and participants aged 35, 40, 45, and 50–65 years in 2018, based on the results of serum  
14  
15  
16 24 antibody tests were analyzed. In the 2018 analysis, in addition to the antibody test results, all  
17  
18  
19 25 participants who had undergone eradication treatment for *H. pylori* were considered as  
20  
21 26 infected. Trends were examined using Joinpoint analysis.  
22

23  
24 27 **Results:** *H. pylori* were detected in 1,100 of 7,586 male, and 190 of 1,739 female participants  
25  
26 28 aged 35 years. Annual infection rates among those aged 35 years showed linear downward  
27  
28  
29 29 trends as follows: men, 17.5% in 2008 to 10.1% in 2018 (slope:  $-0.66$ ); women, 12.3% in  
30  
31  
32 30 2008 to 9.2% in 2018 (slope:  $-0.51$ ) without joinpoints. In the 2018 analysis, 2,432 of 9,580  
33  
34 31 men and 431 of 1,854 women were *H. pylori* positive. Infection rates tended to increase with  
35  
36  
37 32 older age (men: 11.0% [35 years] to 47.7% [65 years], women: 10.0% [35 years] to 40.0%  
38  
39  
40 33 [65 years]), and showed joinpoints in both sexes (men: 54 years, women: 45 years). Although  
41  
42 34 both the first and second trends were upward, the second trends for both men and women  
43  
44  
45 35 were steeper than the first trends ( $P < 0.05$ ).  
46

47 36 **Conclusions:** Our study demonstrated that in the previous 11 years, infection rates of *H.*  
48  
49  
50 37 *pylori* in Japanese 35-year-old male and female workers have constantly decreased, and  
51  
52  
53 38 furthermore, analysis of various age groups showed joinpoints around 50 years, suggesting a  
54  
55  
56

1  
2  
3  
4  
5 39 consistent declining trend in *H. pylori* infection rates in Japan.  
6  
7  
8 40

9  
10 41 **Strengths and limitations of this study**

11  
12  
13 42 • This study presents a recent 11-year time trend of *H. pylori* infection rates based on *H.*  
14  
15 43 *pylori* serum antibody test results of 35-year-old workers from one large company with many  
16  
17  
18 44 branches around Japan, using Joinpoint trend analysis, suggesting a consistent declining  
19  
20  
21 45 trend in *H. pylori* infection rates in both men and women in Japan.  
22

23 46  
24  
25  
26 47 • The 2018 data compared infection rates by age group (35, 40, 45, and 50–65 years), taking  
27  
28  
29 48 into account the history of *H. pylori* eradication treatment obtained by a questionnaire, in  
30  
31  
32 49 addition to antibody testing, demonstrating a joinpoint at around 50 years for both men and  
33  
34  
35 50 women, and a substantially lower infection rate in younger participants.  
36

37 51  
38  
39 52 • The main limitation of this study is the generalizability of the results to the general  
40  
41  
42 53 Japanese population because the study subjects were company employees.  
43  
44

45 54

46  
47 55

48  
49  
50 56 **INTRODUCTION**

51  
52  
53 57 *Helicobacter pylori* (*H. pylori*) is a gram-negative bacterium that is often found in the human  
54  
55  
56

1  
2  
3  
4  
5 58 stomach. *H. pylori* infection is known to be closely associated with chronic gastritis,  
6  
7  
8 59 duodenal ulcers, gastric ulcers, gastric mucosa-associated lymphoid tissue lymphoma, and  
9  
10 60 gastric cancer.<sup>1 2 3 4</sup> The International Agency for Research on Cancer Working group, which  
11  
12  
13 61 is a part of the World Health Organization (WHO), classified *H. pylori* as a Group 1  
14  
15 62 carcinogen for gastric cancer in 1994.<sup>5</sup> Moreover, the WHO has stated that “*H. pylori*  
16  
17  
18 63 screening and treatment strategies would be cost-effective” for asymptomatic populations to  
19  
20  
21 64 prevent gastric cancer, and has recommended that “countries explore the possibility of  
22  
23  
24 65 introducing population-based *H. pylori* screening and treatment programmes”.<sup>6</sup>  
25  
26 66  
27  
28  
29 67 *H. pylori* test-and-treat strategy for preventing gastric cancer is considered more effective in  
30  
31  
32 68 regions with a high incidence of gastric cancer.<sup>7</sup> The incidence and mortality rates of gastric  
33  
34  
35 69 cancer are relatively high in Japan compared with other countries. Moreover, *H. pylori*  
36  
37  
38 70 infection is thought to be involved in more than 90% of gastric cancer cases in Japan.<sup>8 9</sup> In  
39  
40  
41 71 addition, the infection rate of *H. pylori* in Japan is higher than that in other developed  
42  
43  
44 72 countries.<sup>10</sup> Accordingly, the “test-and-treat” strategy for *H. pylori* could be a good measure  
45  
46  
47 73 for preventing gastric cancer in Japan. In 2013, the national health insurance scheme covered  
48  
49  
50 74 the *H. pylori* eradication therapy for chronic gastritis in Japan. Several groups in Japan,  
51  
52  
53 75 including company health insurance societies and local municipalities, have introduced *H.*  
54  
55  
56 76 *pylori* screening tests for asymptomatic people during medical check-ups for the prophylactic

1  
2  
3  
4  
5 77 intervention of gastric cancer.  
6  
7

8 78  
9

10 79 Decreasing the *H. pylori* infection rate could reduce the incidence rate of gastric cancer<sup>11</sup> and  
11

12  
13 80 reduce the positive predictive value of *H. pylori* screening. Therefore, decreasing the *H.*  
14

15 81 *pylori* infection rate in the population may negatively affect the cost-effectiveness of the  
16

17  
18 82 “test-and-treat” strategy for asymptomatic groups. It is important to elucidate the current  
19

20  
21 83 prevalence of *H. pylori* infection and its trends over time, to predict future infection rates and  
22

23  
24 84 plan test strategies for the future. There has been a decrease in the worldwide prevalence of  
25

26 85 *H. pylori*,<sup>10</sup> with several Japanese studies reporting similar results.<sup>12</sup> However, most of these  
27

28  
29 86 studies had small sample sizes or included specific participants, including hospital visitors.  
30

31 87 To our knowledge, there have been no recent large-scale studies on the prevalence and time-  
32

33  
34 88 trend of infection rates of *H. pylori* in Japan.<sup>12 13 14</sup> In addition, several studies have reported  
35

36  
37 89 that the *H. pylori* infection rates become steady at approximately 10% in several low-  
38

39  
40 90 prevalence regions, including European countries.<sup>10 15 16</sup> Watanabe et al. analyzed the  
41

42 91 prevalence of *H. pylori* infection by birth-year among first-visit outpatients between 2005 to  
43

44  
45 92 2013 in Nagoya, Japan. The results showed three trends: the birth-year percent change (BPC)  
46

47 93 = -1.15% in patients born between 1927 and 1949, BPC = -4.59% in patients born between  
48

49  
50 94 1949 and 1961, and BPC = -2.04% in patients born between 1961 and 1988, indicating that  
51

52  
53 95 after a rapid decrease in infection rates in those born between 1949 and 1961, the rate of  
54

1  
2  
3  
4  
5 96 decrease has slowed down.<sup>14</sup> Our present study aimed to elucidate the recent trends in the  
6  
7 97 infection rates of *H. pylori*, including the rates after 2013, which is the year that the health  
8  
9  
10 98 insurance system in Japan began to cover *H. pylori* eradication therapy for chronic gastritis,  
11  
12  
13 99 and whether they showed significant changes with time.  
14  
15

100

18 101 Using data from health checkups in a company health insurance society, this repeated cross-  
19  
20  
21 102 sectional study aimed to clarify the recent 11-year trend of *H. pylori* infection rate in 35-year-  
22  
23  
24 103 olds and *H. pylori* infection rates in 2018 according to age, stratified by sex.  
25  
26

104

## 105 MATERIALS AND METHODS

31 106 Japanese law requires all citizens to have some type of health insurance. T company is one  
32  
33  
34 107 of the largest companies in Japan, with many branches. All workers of this company, which  
35  
36  
37 108 includes a wide variety of people, such as office workers, manual laborers, and people with  
38  
39  
40 109 disabilities, belong to the company's health insurance society. Members of the T company  
41  
42 110 health insurance society undergo serum anti-*Helicobacter pylori* IgG antibody tests. This test  
43  
44  
45 111 was conducted annually on members aged 35 years during their health checkups  
46  
47  
48 112 (approximately 600–1,100 people per year). However, in 2018, the health insurance society  
49  
50  
51 113 offered this test to participants aged 35, 40, 45, and > 50 years. We included members who  
52  
53 114 had undergone serum *H. pylori* antibody tests at their annual health checkups from April 1,  
54  
55  
56  
57  
58  
59  
60

1  
2  
3  
4  
5 115 2008, to March 31, 2019, at the age of 35–65 years. Participants' blood samples were taken  
6  
7  
8 116 at their health checkups. Serum was isolated from the samples, and stored at –80 °C until  
9  
10 117 use. Serum anti-*H. pylori* IgG was measured using an enzyme-linked immunosorbent assay  
11  
12  
13 118 with “E-Plate Eiken *H. pylori* antibody” or “E-Plate II Eiken *H. pylori* antibody” (Eiken  
14  
15  
16 119 Chemical Co. Ltd., Tokyo, Japan). The cut-off level was set at 10 U/mL,<sup>17</sup> with values above  
17  
18 120 this being classified as positive. Anonymized participants' data, including medical  
19  
20  
21 121 questionnaires and blood test results, were obtained from the annual health checkup database  
22  
23  
24 122 of the health insurance society. We excluded data from individuals who refused academic  
25  
26 123 use of their data.  
27  
28

29 124

### 31 125 **Statistical analysis**

32  
33  
34 126 First, data obtained from 35-year-old participants between 2008 and 2018 were analyzed to  
35  
36  
37 127 determine time-trends in *H. pylori* infection rates (“35-year-old analysis”) stratified by sex.  
38  
39  
40 128 Positive results of serum antibody tests for *H. pylori* were defined as *H. pylori* infection.  
41  
42  
43 129 Annual infection rates were calculated based on the antibody test results. Subsequently, we  
44  
45 130 analyzed the time-trend of the rates.  
46  
47

48 131

49  
50 132 Second, we analyzed data from participants aged 35, 40, 45, and 50–65 years old obtained in  
51  
52  
53 133 2018 according to age stratified by sex to determine generational differences in the infection  
54  
55  
56

1  
2  
3  
4  
5 134 rates (“2018 analysis”). In the 2018 analysis, participants who tested positive for antibodies  
6  
7  
8 135 were considered as infected. Further, to reduce the influence of eradication treatment on the  
9  
10 136 infection rate, all participants with a history of eradication treatment of *H. pylori* infection  
11  
12  
13 137 were defined as positive regardless of their tests results for *H. pylori* antibody, with the  
14  
15  
16 138 assumption that a history of eradication treatment indicates a previous infection.

17  
18 139  
19  
20  
21 140 We performed Joinpoint Trend Analysis<sup>18</sup> to identify trends in the infection rate and their  
22  
23  
24 141 changes over time using Joinpoint Regression Program 4.9.0.0.<sup>19</sup> We used the permutation  
25  
26  
27 142 test to select the optimal number of joinpoints in the 35-year-old analysis, whereas we used  
28  
29 143 the Bayesian Information Criterion (BIC) in the 2018 analysis. Linear Model was selected in  
30  
31  
32 144 the analyses. Statistical significance was set at  $P < 0.05$ . Data with missing or ambiguous  
33  
34  
35 145 figures were excluded from the analysis.

36  
37 146

### 38 39 147 **Patient and public involvement**

40  
41  
42 148 After discussions with representatives of the health insurance society about this study, the  
43  
44  
45 149 health insurance society acknowledged the importance of the concept of our study, and  
46  
47  
48 150 permitted us to collect and use participant data from its database. The results of this study are  
49  
50  
51 151 published as a report.

52  
53 152  
54  
55  
56  
57  
58  
59  
60

## 153 **Ethical approval**

154 This study protocol was reviewed and approved by the Institutional Review Board of Tokyo  
155 Medical University (T2019-0044). Following the Ethical Guidelines for Medical and Health  
156 Research Involving Human Subjects,<sup>20</sup> the study information was shown on the websites of  
157 the institutions where the researchers or participants belonged. Participants' consent for using  
158 data was obtained through an opt-out option.

159

## 160 **RESULTS**

161 There were 9,793 and 12,327 participants in the 35-year-old and 2018 analyses, respectively,  
162 with 592 participants overlapping in both analyses. In the 35-year-old analysis, 468  
163 participants were excluded for having missing (n = 314) or ambiguous data (n = 154) in the  
164 records, with 9,325 participants (7,586 men; 1,739 women) being included in the final  
165 analysis. In the 2018 analysis, 893 participants were excluded for having missing (n = 875)  
166 or ambiguous data (n = 18) in the records, with 11,434 participants (9,580 men; 1,854  
167 women) being included in the final analysis (Figure 1).

168

### 169 **The 35-year-old analysis**

170 In the 35-year-old analysis, 1,100 out of 7,586 male participants and 190 out of 1,739 female  
171 participants were *H. pylori*-infected. In Joinpoint analysis, infection rates showed linear



1  
2  
3  
4  
5 172 downward trends in both men and women with advanced years (men: 17.5% in 2008 to  
6  
7  
8 173 10.1% in 2018 (slope  $-0.66$ ), women: 12.3% in 2008 to 9.2% in 2018 (slope  $-0.51$ ) [ $P <$   
9  
10 174 0.05]). These trends lacked joinpoints at which the trend significantly changed (Figure 2).  
11  
12

13 175

### 16 176 **The 2018 analysis**

17  
18 177 In the 2018 analysis, 2,432 out of 9,580 male participants and 431 out of 1,854 female  
19  
20  
21 178 participants were infected with *H. pylori*. The infection rates showed trends of increasing  
22  
23  
24 179 positive rates with advanced age in both men and women (men: 11.0% at 35 years to 47.7%  
25  
26 180 at 65 years, women: 10.0% at 35 years to 40.0% at 65 years). These trends had joinpoints at  
27  
28  
29 181 the age of 54 years in men (95% CI: 45–58) and at the age of 45 in women (95% CI: 45–51),  
30  
31  
32 182 with two different trends in the slope before and after the point. Specifically, the first and  
33  
34 183 second trends were 35–54 years (slope = 0.67) and 54–65 years (slope = 1.83) in men, and  
35  
36  
37 184 35–45 years (slope = 0.30) and 45–65 years (slope = 1.49) in women. Both first and second  
38  
39  
40 185 trends showed a linear increase with age, with the second trends being significantly steeper  
41  
42 186 than the first trends ( $P < 0.05$ ) (Figure 3).  
43  
44

45 187

## 47 188 **DISCUSSION**

48  
49  
50 189 This study investigated the 11-year time-trend from 2008 to 2018, and the trend by age in  
51  
52  
53 190 2018 regarding the prevalence of *H. pylori* infection in Japanese workers stratified by sex  
54  
55  
56  
57  
58  
59  
60

1  
2  
3  
4  
5 191 based on large-scale health checkup data. In the 35-year-old analysis, the infection rate  
6  
7  
8 192 showed a linear declining trend from 2008 to 2018 both in men and women. This provided a  
9  
10 193 good estimate of the *H. pylori* infection trends in Japan, as this study was conducted among  
11  
12  
13 194 workers in a large company with branch offices throughout Japan, and its workers, including  
14  
15  
16 195 workers in the branch offices, were the subjects of this study.  
17

18 196  
19  
20  
21 197 In the 35-year-old analysis, the infection rate decreased linearly to approximately 10% both  
22  
23  
24 198 in men and women; further, this downward trend did not significantly change during the  
25  
26  
27 199 observation period. We assumed that the participants in this analysis, who were all 35 years  
28  
29  
30 200 old were less affected by eradication treatment than older participants; and therefore, the  
31  
32  
33 201 results may closely reflect the actual trend of the incidence rate of *H. pylori* infections in  
34  
35  
36 202 Japan. If the downward trends (slope =  $-0.65$  in men or slope =  $-0.51$  in women) observed  
37  
38  
39 203 in the 35-year-old analysis continues, the infection rate is expected to reach nearly zero by  
40  
41  
42 204 about 2035. In contrast, recent studies on junior high school students (aged: 12–15 years) in  
43  
44  
45 205 Japan have demonstrated that the infection rate of this generation when they reach 35 years  
46  
47  
48 206 at about 2035 will be approximately 3% to 5%,<sup>21 22 23 24</sup> which is higher than our prediction.  
49  
50  
51 207 This inconsistency suggests that the decrease in the infection rate may have slowed down.

52  
53 208  
54  
55  
56 209 In the 2018 analysis, the infection rates in both sexes increased with advanced age. This also  
57  
58  
59  
60

1  
2  
3  
4  
5 210 indicated declining trends in the prevalence rate of *H. pylori* over the years. Furthermore,  
6  
7  
8 211 there were joinpoints around the age of 50 years (54 years in men [95% CI: 45–58] and 45  
9  
10 212 years in women [95% CI: 45–51]), which implies the existence of some type of change  
11  
12  
13 213 affecting the *H. pylori* infection rate in people of this generations (Figure 3). Chronic *H.*  
14  
15 214 *pylori* infection is mostly established in the human stomach during childhood.<sup>25 26</sup> Drinking  
16  
17  
18 215 water and family members are among the sources of *H. pylori* infection.<sup>27</sup> From the late 1960s  
19  
20  
21 216 to the 1970s, which is when people aged 50 years in 2018 spent their childhood, Japan  
22  
23  
24 217 experienced rapid economic growth and urbanization. Accordingly, there was a rapid  
25  
26 218 increase in water supply penetration and a decrease in the average number of households.<sup>28</sup>  
27  
28  
29 219 <sup>29</sup> These rapid environmental changes may have influenced the establishment of *H. pylori*  
30  
31 220 infection; consequently, there was a rapid decrease in the prevalence of this bacterium during  
32  
33  
34 221 this era. Watanabe et al. revealed changes in the declining trend of *H. pylori* infection rate  
35  
36  
37 222 and indicated an effect of environmental changes on the infection rate,<sup>14</sup> which is consistent  
38  
39  
40 223 with our findings.

41  
42 224

43  
44  
45 225 Participants in the 35-year-old analysis were born after 1973; therefore, they may have not  
46  
47  
48 226 experienced the rapid environmental changes that those who were born during the period of  
49  
50  
51 227 high economic growth (1955–1972) had experienced. The 35-year-old analysis revealed a  
52  
53 228 recent gradual decrease in the *H. pylori* infection rate. This suggests that factors other than

1  
2  
3  
4  
5 229 hygiene and family structure may influence infection establishment. As aforementioned, *H.*  
6  
7  
8 230 *pylori* infections are likely to be established during childhood through parent-to-child  
9  
10 231 transmission.<sup>26</sup> In addition to hygienic and environmental improvements, the spread of ready-  
11  
12  
13 232 made baby food after around 1970 may have contributed to the decreased *H. pylori* infection  
14  
15 233 rate.<sup>30</sup> With the recently increasing recognition of *H. pylori* in the general population and  
16  
17  
18 234 coverage of eradication treatment through national insurance, there has been an increase in  
19  
20  
21 235 the number of *H. pylori* eradication treatments in Japan.<sup>31</sup> If treatment decreases the infection  
22  
23  
24 236 rate in child-rearing generation, it could accelerate the declining speed of the infection rates  
25  
26 237 in the next generations.

28  
29 238

30  
31 239 When conducting *H. pylori* screening tests for prophylactic purposes, the prevalence in a  
32  
33  
34 240 target group should be considered to evaluate the effectiveness of the strategy. We observed  
35  
36  
37 241 a decreasing infection rate of *H. pylori* in Japan. In the future, the infection rate may reach  
38  
39  
40 242 zero; accordingly, there would be a decreased importance of screening tests for this bacterium  
41  
42 243 in asymptomatic people. A study on the cost-effectiveness of the test-and-treatment strategy  
43  
44  
45 244 for *H. pylori* revealed that it remained effective even with a low infection rate of  
46  
47  
48 245 approximately 5%.<sup>32</sup> Our findings could inform future public health strategies. Moreover,  
49  
50 246 considering the decrease in *H. pylori* prevalence, *H. pylori* infection-negative gastric cancer  
51  
52  
53 247 has lately been receiving attention.<sup>33 34 35</sup> Research for risk factors of gastric cancer other

1  
2  
3  
4  
5 248 than *H. pylori* is also needed.  
6  
7

8 249  
9

## 10 250 **Limitations**

11  
12  
13 251 This study has several limitations. First, there might have been selection bias, including age,  
14  
15 252 sex, occupation, region, and nationality (possibly including several workers who were born  
16  
17 253 and raised in countries other than Japan). Several studies have analyzed differences in the  
18  
19 254 infection rates according to sex, occupation, and region, with a study reporting a higher  
20  
21 255 infection rate in men; however, there remains no consensus regarding these biases.<sup>36 37 38</sup> Our  
22  
23 256 present study included participants of an unequal number of each sex. This was one reason  
24  
25 257 why we conducted separate analyses for each sex. A recent study showed that employees in  
26  
27 258 a large company are in better health than those in a small one.<sup>39</sup> As the target group of this  
28  
29 259 study were employees of a large company, there is the possibility of such bias. Heterogeneity  
30  
31 260 of age gaps between age groups and limitation of the target ages may have weakened analyses,  
32  
33 261 especially in younger age groups. However, the present study targeted all health insurance  
34  
35 262 society members working in a large company operating throughout Japan, and therefore, we  
36  
37 263 were able to include subjects from various age groups and regions throughout Japan. Second,  
38  
39 264 the history of *H. pylori* eradication may have influenced our findings. In 2008, T company  
40  
41 265 health insurance society performed serum *H. pylori* antibody screening tests for all its  
42  
43 266 members. Therefore, there may have been a higher proportion of post-eradication cases in  
44  
45  
46  
47  
48  
49  
50  
51  
52  
53  
54  
55  
56  
57  
58  
59  
60

1  
2  
3  
4  
5 267 our study than in the general population. We attempted to reduce the influence of eradication  
6  
7  
8 268 treatment by classifying patients who underwent eradication treatment as infected. However,  
9  
10 269 history information acquired through a self-reported questionnaire could have contained  
11  
12  
13 270 inaccuracies, including recall bias.<sup>40</sup> In the 35-year-old analysis, we could not obtain  
14  
15  
16 271 information regarding previous eradication treatment of the participants. We hence analyzed  
17  
18 272 the data based on the assumption that the rate of eradication treatment among participants in  
19  
20  
21 273 the 35-year-old analysis was low, due to their younger age, and therefore would not  
22  
23  
24 274 significantly affect the influence rate. The health insurance society collected and reported, as  
25  
26 275 part of their health services, that the rate of 35-year-old participants who had previously  
27  
28 276 undergone eradication treatment (both men and women) was 0.9%, 2.1%, and 1.4% in 2018,  
29  
30  
31 277 2019, and 2020, respectively. Although this supports our assumption, it indicates the  
32  
33  
34 278 possibility of errors of 1%–2 % from eradication treatment in the infection rates of the 35-  
35  
36  
37 279 year-old analysis. In addition, previous medical history; medications; and measurement  
38  
39  
40 280 biases, including test characteristics and threshold application in the test (including high-  
41  
42 281 negative issues), could have influenced our results.<sup>41 42</sup> The limitations mentioned above may  
43  
44  
45 282 hinder the generalization of our findings to the Japanese general population.  
46  
47  
48 283

49  
50 284 However, the present study collected data of 35-year-olds from 2009 to 2018, and data also  
51  
52  
53 285 of various age groups from 2018, and this information was analyzed using a robust statistical  
54  
55  
56  
57  
58  
59  
60

1  
2  
3  
4  
5 286 method called joinpoint analysis, demonstrating important findings for considering future *H.*  
6  
7  
8 287 *pylori* eradication therapy targets.  
9

10 288

## 13 289 **CONCLUSION**

15 290 Our study showed a constant decreasing time-trend in the infection rate of *H. pylori* among  
16  
17  
18 291 35-year-old workers in Japan from 2008 to 2018. This time-trend indicates that the infection  
19  
20  
21 292 rate of *H. pylori* may continue to decrease in the future. Trends in the infection rate by age  
22  
23  
24 293 in 2018 indicated the possibility of a slowing down of the rate of decrease in the prevalence  
25  
26 294 of *H. pylori* in Japan. In populations with few *H. pylori*-positive individuals, the efficiency  
27  
28  
29 295 of measures to routinely test for antibodies is low, and therefore, it would be difficult to rely  
30  
31  
32 296 solely on the *H. pylori* test and treatment strategy to achieve gastric cancer prevention. We  
33  
34 297 believe that the data regarding changes in the prevalence of *H. pylori* over the years observed  
35  
36  
37 298 in Japan could be useful for other countries with a high incidence of *H. pylori* infection, in  
38  
39  
40 299 planning future eradication strategies.  
41

42 300

## 45 301 **Acknowledgments**

46  
47 302 We would like to acknowledge the T company health insurance society. We would like to  
48  
49  
50 303 thank the Center for International Education and Research of Tokyo Medical University for  
51  
52  
53 304 English language editing.  
54  
55  
56  
57  
58  
59  
60

1  
2  
3  
4  
5 305  
6  
7

8 306 **Footnotes**  
9

10 307 **Contributors:** SA designed the study, analyzed the data, and drafted the manuscript. Y

11  
12 308 Hirayama contributed to the study design and performed general supervision of the whole

13  
14  
15 309 study. JO, Y Harada, and T Toi assisted in conducting the study, interpreting the results, and

16  
17  
18 310 revising the manuscript. KK and TK contributed to data collection and provided advice and

19  
20  
21 311 opinions from an expert perspective. TT contributed to data analysis and revising the

22  
23 312 manuscript from statistical and public health perspectives. All authors read and approved the

24  
25  
26 313 final manuscript.  
27  
28

29 314  
30

31 315 **Funding:** This research received no specific grant from any funding agency in the public,

32  
33  
34 316 commercial, or not-for-profit sectors.  
35  
36

37 317  
38

39 318 **Competing interests:** None declared.  
40  
41

42 319  
43  
44

45 320 **Patient consent for publication:** Not required.  
46  
47

48 321  
49

50 322 **Ethics approval:** The institutional review boards of Tokyo Medical University (T2019-

51  
52  
53 323 0044)  
54  
55  
56  
57  
58  
59  
60



324

325 **Provenance and peer review:** Not commissioned; externally peer-reviewed.

326

327 **Data sharing statement:** Data is available in a public, open access repository. <sup>43</sup>

328

329

## 330 REFERENCES

- 331 1. Wang F, Meng W, Wang B, et al. Helicobacter pylori-induced gastric inflammation and  
332 gastric cancer. *Cancer Lett* 2014;345(2):196-202. doi: 10.1016/j.canlet.2013.08.016  
333 [published Online First: 2013/08/29]
- 334 2. Huang JQ, Sridhar S, Hunt RH. Role of Helicobacter pylori infection and non-steroidal  
335 anti-inflammatory drugs in peptic-ulcer disease: a meta-analysis. *Lancet*  
336 2002;359(9300):14-22. doi: 10.1016/s0140-6736(02)07273-2 [published Online  
337 First: 2002/01/26]
- 338 3. Eck M, Schmausser B, Haas R, et al. MALT-type lymphoma of the stomach is associated  
339 with Helicobacter pylori strains expressing the CagA protein. *Gastroenterology*  
340 1997;112(5):1482-6. doi: 10.1016/s0016-5085(97)70028-3 [published Online First:  
341 1997/05/01]
- 342 4. Sasazuki S, Inoue M, Iwasaki M, et al. Effect of Helicobacter pylori infection combined

- 1  
2  
3  
4  
5 343 with CagA and pepsinogen status on gastric cancer development among Japanese  
6  
7  
8 344 men and women: a nested case-control study. *Cancer Epidemiol Biomarkers Prev*  
9  
10 345 2006;15(7):1341-7. doi: 10.1158/1055-9965.EPI-05-0901 [published Online First:  
11  
12  
13 346 2006/07/13]
- 14  
15 347 5. IARC Working Group on the Evaluation of Carcinogenic Risks to Humans. Schistosomes,  
16  
17  
18 348 Liver Flukes and *Helicobacter pylori*. Lyon (FR): International Agency for Research  
19  
20  
21 349 on Cancer 1994.
- 22  
23 350 6. IARC *Helicobacter pylori* Working Group. *Helicobacter pylori* Eradication as a Strategy  
24  
25  
26 351 for Preventing Gastric Cancer: International Agency for Research on Cancer 2014.
- 27  
28  
29 352 7. Ford AC, Forman D, Hunt RH, et al. *Helicobacter pylori* eradication therapy to prevent  
30  
31  
32 353 gastric cancer in healthy asymptomatic infected individuals: systematic review and  
33  
34 354 meta-analysis of randomised controlled trials. *BMJ* 2014;348:g3174. doi:  
35  
36 355 10.1136/bmj.g3174
- 37  
38  
39 356 8. Center for Cancer Control and Information Services, National Cancer Center. CANCER  
40  
41  
42 357 STATISTICS IN JAPAN '19 [updated 17 April 2020. Available from:  
43  
44 358 [https://ganjoho.jp/en/professional/statistics/brochure/2019\\_en.html](https://ganjoho.jp/en/professional/statistics/brochure/2019_en.html) accessed 22 Dec  
45  
46 359 2020.
- 47  
48  
49 360 9. Matsuo T, Ito M, Takata S, et al. Low prevalence of *Helicobacter pylori*-negative gastric  
50  
51  
52 361 cancer among Japanese. *Helicobacter* 2011;16(6):415-9. doi: 10.1111/j.1523-

- 1  
2  
3  
4  
5 362 5378.2011.00889.x [published Online First: 2011/11/09]  
6  
7  
8 363 10. Peleteiro B, Bastos A, Ferro A, et al. Prevalence of Helicobacter pylori infection  
9  
10 364 worldwide: a systematic review of studies with national coverage. *Dig Dis Sci*  
11  
12 365 2014;59(8):1698-709. doi: 10.1007/s10620-014-3063-0 [published Online First:  
13  
14 366 2014/02/25]  
15  
16  
17  
18 367 11. Tsuda M, Asaka M, Kato M, et al. Effect on Helicobacter pylori eradication therapy  
19  
20 368 against gastric cancer in Japan. *Helicobacter* 2017;22(5) doi: 10.1111/hel.12415  
21  
22 369 [published Online First: 2017/08/05]  
23  
24  
25  
26 370 12. Wang C, Nishiyama T, Kikuchi S, et al. Changing trends in the prevalence of H. pylori  
27  
28 371 infection in Japan (1908-2003): a systematic review and meta-regression analysis of  
29  
30 372 170,752 individuals. *Sci Rep* 2017;7(1):15491. doi: 10.1038/s41598-017-15490-7  
31  
32 373 [published Online First: 2017/11/16]  
33  
34  
35  
36  
37 374 13. Inoue M. Changing epidemiology of Helicobacter pylori in Japan. *Gastric Cancer*  
38  
39 375 2017;20(Suppl 1):3-7. doi: 10.1007/s10120-016-0658-5 [published Online First:  
40  
41 376 2016/10/21]  
42  
43  
44  
45 377 14. Watanabe M, Ito H, Hosono S, et al. Declining trends in prevalence of Helicobacter pylori  
46  
47 378 infection by birth-year in a Japanese population. *Cancer Sci* 2015;106(12):1738-43.  
48  
49 379 doi: 10.1111/cas.12821 [published Online First: 2015/09/24]  
50  
51  
52  
53 380 15. Carmack SW, Genta RM. Helicobacter pylori seroprevalence in symptomatic veterans: a  
54  
55  
56  
57  
58  
59  
60

- 1  
2  
3  
4  
5 381 study of 7310 patients over 11 years. *Helicobacter* 2009;14(4):298-302. doi:  
6  
7  
8 382 10.1111/j.1523-5378.2009.00693.x  
9  
10 383 16. den Hoed CM, Vila AJ, Holster IL, et al. Helicobacter pylori and the birth cohort effect:  
11  
12 384 evidence for stabilized colonization rates in childhood. *Helicobacter* 2011;16(5):405-  
13  
14 385 9. doi: 10.1111/j.1523-5378.2011.00854.x [published Online First: 2011/09/20]  
15  
16  
17  
18 386 17. Komatsu Y, Sugiyama T, Asaka M. Helicobacter pylori kansenshingan ni okeru  
19  
20 387 nihonjinkabu wo siyou sita ELISA kit " E-plate eiken H.pylori koutai" no yuyousei  
21  
22 388 no kentou [Study of effectiveness of E-plate eiken which is ELAISA kit using  
23  
24 389 Japanese strain in diagnose of Helicobacter pylori infection]. *The Journal of Clinical*  
25  
26 390 *Laboratory Instruments and Reagents* 2001;24(5):331-35.  
27  
28  
29  
30  
31 391 18. Kim HJ, Fay MP, Feuer EJ, et al. Permutation tests for joinpoint regression with  
32  
33 392 applications to cancer rates. *Stat Med* 2000;19(3):335-51. doi: 10.1002/(sici)1097-  
34  
35 393 0258(20000215)19:3<335::aid-sim336>3.0.co;2-z [published Online First:  
36  
37 394 2000/01/29]  
38  
39  
40  
41  
42 395 19. Joinpoint Regression Program [program]. Version 4.9.0.0 version: Statistical  
43  
44 396 Methodology and Applications Branch, Surveillance Research Program, National  
45  
46 397 Cancer Institute., March 2021.  
47  
48  
49  
50 398 20. Ministry of Health, Labour and Welfare. Ethical Guidelines for Medical and Health  
51  
52 399 Research Involving Human Subjects 2015 [Available from:  
53  
54  
55  
56  
57  
58  
59  
60

- 1  
2  
3  
4  
5 400 <https://www.mhlw.go.jp/file/06-Seisakujouhou-10600000->  
6  
7  
8 401 [Daijinkanboukouseikagakuka/0000080278.pdf](https://www.mhlw.go.jp/file/06-Seisakujouhou-10600000-Daijinkanboukouseikagakuka/0000080278.pdf) accessed 6 Dec 2020.  
9  
10 402 21. Kusano C, Gotoda T, Ishikawa H, et al. The administrative project of *Helicobacter pylori*  
11  
12  
13 403 infection screening among junior high school students in an area of Japan with a high  
14  
15 404 incidence of gastric cancer. *Gastric Cancer* 2017;20(Suppl 1):16-19. doi:  
16  
17 405 10.1007/s10120-017-0688-7 [published Online First: 2017/01/18]  
18  
19  
20  
21 406 22. Honma H, Nakayama Y, Kato S, et al. Clinical features of *Helicobacter pylori* antibody-  
22  
23  
24 407 positive junior high school students in Nagano Prefecture, Japan. *Helicobacter*  
25  
26 408 2018:e12559. doi: 10.1111/hel.12559 [published Online First: 2018/12/06]  
27  
28  
29 409 23. Nakayama Y, Lin Y, Hongo M, et al. *Helicobacter pylori* infection and its related factors  
30  
31 410 in junior high school students in Nagano Prefecture, Japan. *Helicobacter* 2017;22(2)  
32  
33 411 doi: 10.1111/hel.12363 [published Online First: 2016/10/28]  
34  
35  
36  
37 412 24. Kakiuchi T, Matsuo M, Endo H, et al. A *Helicobacter pylori* screening and treatment  
38  
39 413 program to eliminate gastric cancer among junior high school students in Saga  
40  
41 414 Prefecture: a preliminary report. *J Gastroenterol* 2019 doi: 10.1007/s00535-019-  
42  
43 415 01559-9 [published Online First: 2019/02/17]  
44  
45  
46  
47 416 25. Banatvala N, Mayo K, Megraud F, et al. The cohort effect and *Helicobacter pylori*. *J*  
48  
49 417 *Infect Dis* 1993;168(1):219-21. doi: 10.1093/infdis/168.1.219  
50  
51  
52  
53 418 26. O'Ryan ML, Lucero Y, Rabello M, et al. Persistent and transient *Helicobacter pylori*  
54  
55  
56  
57  
58  
59  
60

- 1  
2  
3  
4  
5 419 infections in early childhood. *Clin Infect Dis* 2015;61(2):211-8. doi:  
6  
7  
8 420 10.1093/cid/civ256  
9  
10 421 27. Ueda M, Kikuchi S, Kasugai T, et al. Helicobacter pylori risk associated with childhood  
11  
12 home environment. *Cancer Sci* 2003;94(10):914-8. doi: 10.1111/j.1349-  
13 422 7006.2003.tb01375.x [published Online First: 2003/10/15]  
14  
15 423  
16  
17 424 28. JAPAN WATER WORKS ASSOCIATION. Water Supply in Japan 2017 [Available  
18  
19 from: [http://www.jwwa.or.jp/jigyoku/kaigai\\_file/2017WaterSupplyInJapan.pdf](http://www.jwwa.or.jp/jigyoku/kaigai_file/2017WaterSupplyInJapan.pdf)  
20  
21 425  
22 accessed Dec 22 2020.  
23  
24 426  
25  
26 427 29. Ministry of Health, Labour and Welfare. General Welfare and Labour Japan [Available  
27  
28 from: <https://www.mhlw.go.jp/english/wp/wp-hw9/dl/01e.pdf> accessed 1st Oct 2020.  
29  
30 428  
31 429 30. Council JBF. Seisan Tokei [Production statistics] Japan [Available from:  
32  
33 <https://www.baby-food.jp/link/ayumi-jikei.html> accessed 11 Dec 2020.  
34  
35 430  
36  
37 431 31. Hiroi S, Sugano K, Tanaka S, et al. Impact of health insurance coverage for Helicobacter  
38  
39 432 pylori gastritis on the trends in eradication therapy in Japan: retrospective  
40  
41 433 observational study and simulation study based on real-world data. *BMJ Open*  
42  
43 434 2017;7(7):e015855. doi: 10.1136/bmjopen-2017-015855 [published Online First:  
44  
45 435 2017/08/02]  
46  
47  
48  
49 436 32. Kowada A. Cost-effectiveness of Helicobacter pylori screening followed by eradication  
50  
51 437 treatment for employees in Japan. *Epidemiol Infect* 2018;146(14):1834-40. doi:  
52  
53  
54  
55  
56  
57  
58  
59  
60

- 1  
2  
3  
4  
5 438 10.1017/S095026881800208X [published Online First: 2018/07/31]  
6  
7  
8 439 33. Kato S, Matsukura N, Tsukada K, et al. Helicobacter pylori infection-negative gastric  
9  
10 440 cancer in Japanese hospital patients: Incidence and pathological characteristics.  
11  
12  
13 441 *Cancer Sci* 2007;98(6):790-94. doi: <https://doi.org/10.1111/j.1349->  
14  
15 442 7006.2007.00478.x  
16  
17  
18 443 34. Yamamoto Y, Fujisaki J, Omae M, et al. Helicobacter pylori-negative gastric cancer:  
19  
20 444 characteristics and endoscopic findings. *Digestive endoscopy : official journal of the*  
21  
22  
23 445 *Japan Gastroenterological Endoscopy Society* 2015;27(5):551-61. doi:  
24  
25 446 10.1111/den.12471 [published Online First: 2015/03/27]  
26  
27  
28  
29 447 35. Takita M, Ohata K, Inamoto R, et al. Endoscopic and histological features of Helicobacter  
30  
31 448 pylori-negative differentiated gastric adenocarcinoma arising in the antrum. *JGH*  
32  
33 449 *open : an open access journal of gastroenterology and hepatology* 2021;5(4):470-77.  
34  
35 450 doi: 10.1002/jgh3.12518 [published Online First: 2021/04/17]  
36  
37  
38  
39 451 36. Kheyre H, Morais S, Ferro A, et al. The occupational risk of Helicobacter pylori infection:  
40  
41 452 a systematic review. *Int Arch Occup Environ Health* 2018;91(6):657-74. doi:  
42  
43 453 10.1007/s00420-018-1315-6  
44  
45  
46  
47 454 37. Ueda J, Gosho M, Inui Y, et al. Prevalence of Helicobacter pylori infection by birth year  
48  
49 455 and geographic area in Japan. *Helicobacter* 2014;19(2):105-10. doi:  
50  
51 456 10.1111/hel.12110 [published Online First: 2014/02/11]  
52  
53  
54  
55  
56  
57  
58  
59  
60

- 1  
2  
3  
4  
5 457 38. Ferro A, Morais S, Pelucchi C, et al. Sex differences in the prevalence of *Helicobacter*  
6  
7  
8 458 *pylori* infection: an individual participant data pooled analysis (StoP Project). *Eur J*  
9  
10 459 *Gastroenterol Hepatol* 2019;31(5):593-98. doi: 10.1097/MEG.0000000000001389  
11  
12  
13 460 [published Online First: 2019/03/07]
- 14  
15  
16 461 39. Kanamori S, Tsuji T, Takamiya T, et al. Size of company of the longest-held job and  
17  
18 462 mortality in older Japanese adults: A 6-year follow-up study from the Japan  
19  
20  
21 463 Gerontological Evaluation Study. *J Occup Health* 2020;62(1):e12115. doi:  
22  
23  
24 464 10.1002/1348-9585.12115 [published Online First: 2020/06/10]
- 25  
26 465 40. Coughlin SS. Recall bias in epidemiologic studies. *J Clin Epidemiol* 1990;43(1):87-91.  
27  
28  
29 466 doi: 10.1016/0895-4356(90)90060-3
- 30  
31 467 41. Miftahussurur M, Yamaoka Y. Diagnostic Methods of *Helicobacter pylori* Infection for  
32  
33  
34 468 Epidemiological Studies: Critical Importance of Indirect Test Validation. *BioMed*  
35  
36  
37 469 *research international* 2016;2016:4819423. doi: 10.1155/2016/4819423 [published  
38  
39  
40 470 Online First: 2016/02/24]
- 41  
42 471 42. Inoue M, Sawada N, Goto A, et al. High-Negative Anti-*Helicobacter pylori* IgG Antibody  
43  
44  
45 472 Titers and Long-Term Risk of Gastric Cancer: Results from a Large-Scale  
46  
47  
48 473 Population-Based Cohort Study in Japan. *Cancer Epidemiol Biomarkers Prev*  
49  
50  
51 474 2020;29(2):420-26. doi: 10.1158/1055-9965.EPI-19-0993 [published Online First:  
52  
53 475 2019/12/13]
- 54  
55  
56  
57  
58  
59  
60



1  
2  
3  
4  
5 476 [dataset] 43. Soichiro A. Data from: Changes in prevalence of *Helicobacter pylori* in Japan  
6  
7  
8 477 from 2008 to 2018: a repeated cross-sectional study, figshare, July 13, 2022  
9  
10 478 <https://doi.org/10.6084/m9.figshare.14594571.v2>  
11  
12

13 479

14  
15 480

16  
17  
18 481 **FIGURE LEGENDS**

19  
20  
21 482 **Figure 1**

22  
23 483 *Numbers of participants*

24  
25  
26 484

27  
28  
29 485 Figure 1

30  
31 486 *Note.* (a) The 35-year-old analysis: participants aged 35 years from 2008 to 2018. (b) The

32  
33 487 2018 analysis: participants aged 35–65 years in 2018.  
34  
35  
36

37 488

38  
39 489

40  
41  
42 490 **Figure 2:**

43  
44 491 *Infection rates of *Helicobacter pylori* at 35 years old from 2008 to 2018 (men: n = 7,586,*

45  
46 492 *women: n= 1,739)*

47  
48  
49 493

50  
51  
52 494 Figure 2

1  
2  
3  
4  
5 495 *Note.* Infection rates at 35 years linearly decreased by years. (A) men: 17.5% in 2008 to  
6  
7  
8 496 10.1% in 2018 (slope: -0.65). (B) women: 12.3% in 2008 to 9.2% in 2018 (slope: -0.51).  
9  
10 497 There were no joinpoints. “\*” in the graph legend indicates a significant difference in the  
11  
12  
13 498 slope from zero at the alpha = 0.05 level.  
14  
15  
16 499  
17  
18 500  
19  
20

21 **Figure 3**

22  
23 502 *Infection rates of Helicobacter pylori according to age in 2018 (men: n = 9,580, women:*  
24  
25  
26 503 *n=1,854)*  
27  
28  
29 504

30  
31 Figure 3

32  
33  
34 506 *Note.* Infection rates increased in two trends. (A) men: first trend: 35–54 years [slope = 0.67];  
35  
36  
37 507 second trend: 54–65 years [slope = 1.83]. (B) female: first trend: 35–45 years [slope = 0.30];  
38  
39  
40 508 second trend: 45–65 years [slope = 1.49]. “\*” in the graph legend indicates a significant  
41  
42 509 difference in the slope from zero at the alpha = 0.05 level.  
43  
44  
45 510  
46  
47  
48 511  
49  
50  
51  
52  
53  
54  
55  
56  
57  
58  
59  
60



Figure 1: *Note.* (a) The 35-year-old analysis: participants aged 35 years from 2008 to 2018. (b) The 2018 analysis: participants aged 35–65 years in 2018.

338x190mm (300 x 300 DPI)

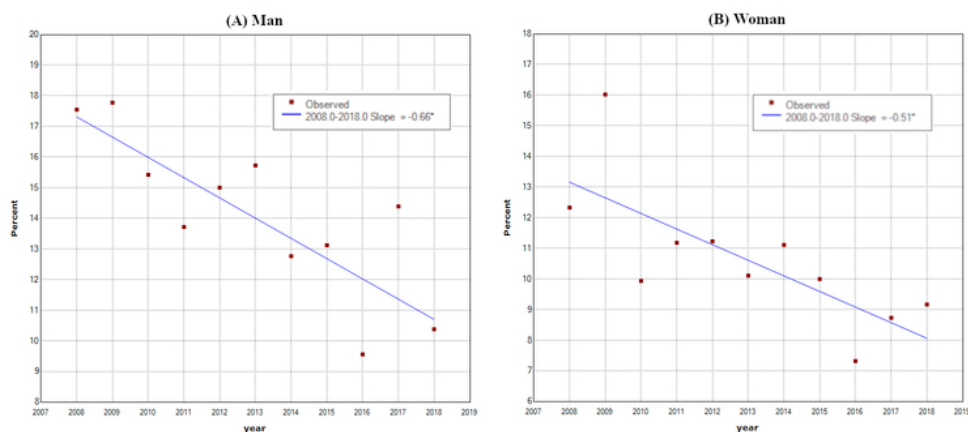

Figure 2: Note. Infection rates at 35 years linearly decreased by years. (A) men: 17.5% in 2008 to 10.1% in 2018 (slope: -0.65). (B) women: 12.3% in 2008 to 9.2% in 2018 (slope: -0.51). There were no joinpoints. "\*" in the graph legend indicates a significant difference in the slope from zero at the alpha = 0.05 level.

32x14mm (600 x 600 DPI)

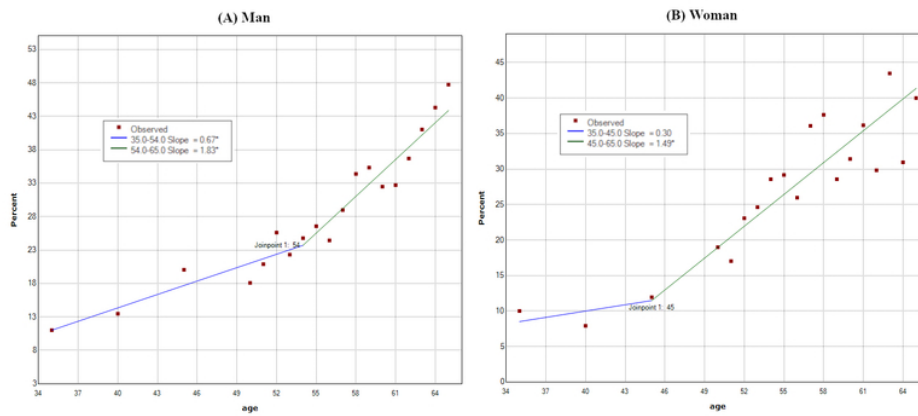

Figure 3: Note. Infection rates increased in two trends. (A) men: first trend: 35–54 years [slope = 0.67]; second trend: 54–65 years [slope = 1.83]. (B) female: first trend: 35–45 years [slope = 0.30]; second trend: 45–65 years [slope = 1.49]. "\*" in the graph legend indicates a significant difference in the slope from zero at the alpha = 0.05 level.

35x15mm (600 x 600 DPI)

# Reporting checklist for cross sectional study.

Based on the STROBE cross sectional guidelines.

## Instructions to authors

Complete this checklist by entering the page numbers from your manuscript where readers will find each of the items listed below.

Your article may not currently address all the items on the checklist. Please modify your text to include the missing information. If you are certain that an item does not apply, please write "n/a" and provide a short explanation.

Upload your completed checklist as an extra file when you submit to a journal.

In your methods section, say that you used the STROBE cross sectional reporting guidelines, and cite them as:

von Elm E, Altman DG, Egger M, Pocock SJ, Gotsche PC, Vandenbroucke JP. The Strengthening the Reporting of Observational Studies in Epidemiology (STROBE) Statement: guidelines for reporting observational studies.

|                           |                     |                                                                                    | Page   |
|---------------------------|---------------------|------------------------------------------------------------------------------------|--------|
|                           | Reporting Item      |                                                                                    | Number |
| <b>Title and abstract</b> |                     |                                                                                    |        |
| Title                     | <a href="#">#1a</a> | Indicate the study's design with a commonly used term in the title or the abstract | 1      |
| Abstract                  | <a href="#">#1b</a> | Provide in the abstract an informative and balanced summary                        | 1-3    |

of what was done and what was found

## Introduction

|                               |                     |                                                                                                                                                                                                                                                                      |       |
|-------------------------------|---------------------|----------------------------------------------------------------------------------------------------------------------------------------------------------------------------------------------------------------------------------------------------------------------|-------|
| Background /<br>rationale     | <a href="#">#2</a>  | Explain the scientific background and rationale for the investigation being reported                                                                                                                                                                                 | 3-6   |
| Objectives                    | <a href="#">#3</a>  | State specific objectives, including any prespecified hypotheses                                                                                                                                                                                                     | 6     |
| <b>Methods</b>                |                     |                                                                                                                                                                                                                                                                      |       |
| Study design                  | <a href="#">#4</a>  | Present key elements of study design early in the paper                                                                                                                                                                                                              | 6     |
| Setting                       | <a href="#">#5</a>  | Describe the setting, locations, and relevant dates, including periods of recruitment, exposure, follow-up, and data collection                                                                                                                                      | 6-7   |
| Eligibility criteria          | <a href="#">#6a</a> | Give the eligibility criteria, and the sources and methods of selection of participants.                                                                                                                                                                             | 6-7   |
|                               | <a href="#">#7</a>  | Clearly define all outcomes, exposures, predictors, potential confounders, and effect modifiers. Give diagnostic criteria, if applicable                                                                                                                             | 6-8   |
| Data sources /<br>measurement | <a href="#">#8</a>  | For each variable of interest give sources of data and details of methods of assessment (measurement). Describe comparability of assessment methods if there is more than one group. Give information separately for for exposed and unexposed groups if applicable. | 6-8   |
| Bias                          | <a href="#">#9</a>  | Describe any efforts to address potential sources of bias                                                                                                                                                                                                            | 14-15 |
| Study size                    | <a href="#">#10</a> | Explain how the study size was arrived at                                                                                                                                                                                                                            | n/a   |

|    |                  |                      |                                                                   |          |
|----|------------------|----------------------|-------------------------------------------------------------------|----------|
| 1  | Quantitative     | <a href="#">#11</a>  | Explain how quantitative variables were handled in the            | n/a      |
| 2  |                  |                      |                                                                   |          |
| 3  | variables        |                      | analyses. If applicable, describe which groupings were chosen,    |          |
| 4  |                  |                      |                                                                   |          |
| 5  |                  |                      | and why                                                           |          |
| 6  |                  |                      |                                                                   |          |
| 7  |                  |                      |                                                                   |          |
| 8  |                  |                      |                                                                   |          |
| 9  | Statistical      | <a href="#">#12a</a> | Describe all statistical methods, including those used to control | 7-8      |
| 10 |                  |                      |                                                                   |          |
| 11 | methods          |                      | for confounding                                                   |          |
| 12 |                  |                      |                                                                   |          |
| 13 |                  |                      |                                                                   |          |
| 14 | Statistical      | <a href="#">#12b</a> | Describe any methods used to examine subgroups and                | 7-8      |
| 15 |                  |                      |                                                                   |          |
| 16 | methods          |                      | interactions                                                      |          |
| 17 |                  |                      |                                                                   |          |
| 18 |                  |                      |                                                                   |          |
| 19 | Statistical      | <a href="#">#12c</a> | Explain how missing data were addressed                           | 7        |
| 20 |                  |                      |                                                                   |          |
| 21 | methods          |                      |                                                                   |          |
| 22 |                  |                      |                                                                   |          |
| 23 |                  |                      |                                                                   |          |
| 24 |                  |                      |                                                                   |          |
| 25 | Statistical      | <a href="#">#12d</a> | If applicable, describe analytical methods taking account of      | n/a      |
| 26 |                  |                      |                                                                   |          |
| 27 | methods          |                      | sampling strategy                                                 |          |
| 28 |                  |                      |                                                                   |          |
| 29 |                  |                      |                                                                   |          |
| 30 | Statistical      | <a href="#">#12e</a> | Describe any sensitivity analyses                                 | n/a      |
| 31 |                  |                      |                                                                   |          |
| 32 | methods          |                      |                                                                   |          |
| 33 |                  |                      |                                                                   |          |
| 34 |                  |                      |                                                                   |          |
| 35 |                  |                      |                                                                   |          |
| 36 | <b>Results</b>   |                      |                                                                   |          |
| 37 |                  |                      |                                                                   |          |
| 38 |                  |                      |                                                                   |          |
| 39 | Participants     | <a href="#">#13a</a> | Report numbers of individuals at each stage of study—eg           | 9-10     |
| 40 |                  |                      |                                                                   |          |
| 41 |                  |                      | numbers potentially eligible, examined for eligibility, confirmed |          |
| 42 |                  |                      |                                                                   |          |
| 43 |                  |                      | eligible, included in the study, completing follow-up, and        |          |
| 44 |                  |                      |                                                                   |          |
| 45 |                  |                      | analysed. Give information separately for for exposed and         |          |
| 46 |                  |                      |                                                                   |          |
| 47 |                  |                      | unexposed groups if applicable.                                   |          |
| 48 |                  |                      |                                                                   |          |
| 49 |                  |                      |                                                                   |          |
| 50 |                  |                      |                                                                   |          |
| 51 | Participants     | <a href="#">#13b</a> | Give reasons for non-participation at each stage                  | 9        |
| 52 |                  |                      |                                                                   |          |
| 53 |                  |                      |                                                                   |          |
| 54 | Participants     | <a href="#">#13c</a> | Consider use of a flow diagram                                    | 9        |
| 55 |                  |                      |                                                                   |          |
| 56 |                  |                      |                                                                   |          |
| 57 | Descriptive data | <a href="#">#14a</a> | Give characteristics of study participants (eg demographic,       | 6-7, 14- |
| 58 |                  |                      |                                                                   |          |
| 59 |                  |                      |                                                                   |          |
| 60 |                  |                      |                                                                   |          |



|    |                   |                                                                                        |       |
|----|-------------------|----------------------------------------------------------------------------------------|-------|
| 1  |                   | clinical, social) and information on exposures and potential                           | 15    |
| 2  |                   |                                                                                        |       |
| 3  |                   | confounders. Give information separately for exposed and                               |       |
| 4  |                   |                                                                                        |       |
| 5  |                   | unexposed groups if applicable.                                                        |       |
| 6  |                   |                                                                                        |       |
| 7  |                   |                                                                                        |       |
| 8  | Descriptive data  | <a href="#">#14b</a> Indicate number of participants with missing data for each        | 9-10  |
| 9  |                   |                                                                                        |       |
| 10 |                   | variable of interest                                                                   |       |
| 11 |                   |                                                                                        |       |
| 12 |                   |                                                                                        |       |
| 13 | Outcome data      | <a href="#">#15</a> Report numbers of outcome events or summary measures.              | 9-10  |
| 14 |                   |                                                                                        |       |
| 15 |                   | Give information separately for exposed and unexposed                                  |       |
| 16 |                   |                                                                                        |       |
| 17 |                   | groups if applicable.                                                                  |       |
| 18 |                   |                                                                                        |       |
| 19 |                   |                                                                                        |       |
| 20 |                   |                                                                                        |       |
| 21 | Main results      | <a href="#">#16a</a> Give unadjusted estimates and, if applicable, confounder-         | 9-10  |
| 22 |                   |                                                                                        |       |
| 23 |                   | adjusted estimates and their precision (eg, 95% confidence                             |       |
| 24 |                   |                                                                                        |       |
| 25 |                   | interval). Make clear which confounders were adjusted for and                          |       |
| 26 |                   |                                                                                        |       |
| 27 |                   | why they were included                                                                 |       |
| 28 |                   |                                                                                        |       |
| 29 |                   |                                                                                        |       |
| 30 |                   |                                                                                        |       |
| 31 | Main results      | <a href="#">#16b</a> Report category boundaries when continuous variables were         | n/a   |
| 32 |                   |                                                                                        |       |
| 33 |                   | categorized                                                                            |       |
| 34 |                   |                                                                                        |       |
| 35 |                   |                                                                                        |       |
| 36 | Main results      | <a href="#">#16c</a> If relevant, consider translating estimates of relative risk into | n/a   |
| 37 |                   |                                                                                        |       |
| 38 |                   | absolute risk for a meaningful time period                                             |       |
| 39 |                   |                                                                                        |       |
| 40 |                   |                                                                                        |       |
| 41 |                   |                                                                                        |       |
| 42 | Other analyses    | <a href="#">#17</a> Report other analyses done—e.g., analyses of subgroups and         | n/a   |
| 43 |                   |                                                                                        |       |
| 44 |                   | interactions, and sensitivity analyses                                                 |       |
| 45 |                   |                                                                                        |       |
| 46 |                   |                                                                                        |       |
| 47 | <b>Discussion</b> |                                                                                        |       |
| 48 |                   |                                                                                        |       |
| 49 |                   |                                                                                        |       |
| 50 | Key results       | <a href="#">#18</a> Summarise key results with reference to study objectives           | 11-12 |
| 51 |                   |                                                                                        |       |
| 52 |                   |                                                                                        |       |
| 53 | Limitations       | <a href="#">#19</a> Discuss limitations of the study, taking into account sources of   | 14-15 |
| 54 |                   |                                                                                        |       |
| 55 |                   | potential bias or imprecision. Discuss both direction and                              |       |
| 56 |                   |                                                                                        |       |
| 57 |                   | magnitude of any potential bias.                                                       |       |
| 58 |                   |                                                                                        |       |
| 59 |                   |                                                                                        |       |
| 60 |                   |                                                                                        |       |

|    |                          |                     |                                                                      |       |
|----|--------------------------|---------------------|----------------------------------------------------------------------|-------|
| 1  | Interpretation           | <a href="#">#20</a> | Give a cautious overall interpretation considering objectives,       | 10-15 |
| 2  |                          |                     | limitations, multiplicity of analyses, results from similar studies, |       |
| 3  |                          |                     | and other relevant evidence.                                         |       |
| 4  |                          |                     |                                                                      |       |
| 5  |                          |                     |                                                                      |       |
| 6  |                          |                     |                                                                      |       |
| 7  |                          |                     |                                                                      |       |
| 8  |                          |                     |                                                                      |       |
| 9  | Generalisability         | <a href="#">#21</a> | Discuss the generalisability (external validity) of the study        | 15    |
| 10 |                          |                     | results                                                              |       |
| 11 |                          |                     |                                                                      |       |
| 12 |                          |                     |                                                                      |       |
| 13 |                          |                     |                                                                      |       |
| 14 | <b>Other Information</b> |                     |                                                                      |       |
| 15 |                          |                     |                                                                      |       |
| 16 |                          |                     |                                                                      |       |
| 17 | Funding                  | <a href="#">#22</a> | Give the source of funding and the role of the funders for the       | n/a   |
| 18 |                          |                     | present study and, if applicable, for the original study on which    |       |
| 19 |                          |                     | the present article is based                                         |       |
| 20 |                          |                     |                                                                      |       |
| 21 |                          |                     |                                                                      |       |
| 22 |                          |                     |                                                                      |       |
| 23 |                          |                     |                                                                      |       |
| 24 |                          |                     |                                                                      |       |

25 The STROBE checklist is distributed under the terms of the Creative Commons Attribution License  
26 CC-BY. This checklist was completed on 20. September 2021 using <https://www.goodreports.org/>, a  
27 tool made by the [EQUATOR Network](#) in collaboration with [Penelope.ai](#)  
28  
29  
30  
31  
32  
33  
34  
35  
36  
37  
38  
39  
40  
41  
42  
43  
44  
45  
46  
47  
48  
49  
50  
51  
52  
53  
54  
55  
56  
57  
58  
59  
60

# BMJ Open

## Changes in prevalence of *Helicobacter pylori* in Japan from 2008 to 2018: a repeated cross-sectional study

|                                 |                                                                                                                                                                                                                                                                                                                                                                                                                                                                                                                                                                                                                                                                                                                                                                                                                                                                                              |
|---------------------------------|----------------------------------------------------------------------------------------------------------------------------------------------------------------------------------------------------------------------------------------------------------------------------------------------------------------------------------------------------------------------------------------------------------------------------------------------------------------------------------------------------------------------------------------------------------------------------------------------------------------------------------------------------------------------------------------------------------------------------------------------------------------------------------------------------------------------------------------------------------------------------------------------|
| Journal:                        | <i>BMJ Open</i>                                                                                                                                                                                                                                                                                                                                                                                                                                                                                                                                                                                                                                                                                                                                                                                                                                                                              |
| Manuscript ID                   | bmjopen-2021-058774.R2                                                                                                                                                                                                                                                                                                                                                                                                                                                                                                                                                                                                                                                                                                                                                                                                                                                                       |
| Article Type:                   | Original research                                                                                                                                                                                                                                                                                                                                                                                                                                                                                                                                                                                                                                                                                                                                                                                                                                                                            |
| Date Submitted by the Author:   | 05-Aug-2022                                                                                                                                                                                                                                                                                                                                                                                                                                                                                                                                                                                                                                                                                                                                                                                                                                                                                  |
| Complete List of Authors:       | Abiko, Soichiro; Tokyo Medical University, Department of General Medicine and Primary Care<br>Hirayama, Yoji; Tokyo Medical University, Department of General Medicine and Primary Care<br>Otaki, Junji; Tokyo Medical University, Department of Medical Education; Tokyo Medical University, Department of General Medicine and Primary Care<br>Harada, Yoshimi; Tokyo Medical University, Department of Medical Education; Tokyo Medical University, Department of General Medicine and Primary Care<br>Kawakami, Kohei; Tokyo Medical University, Department of General Medicine and Primary Care<br>Toi, Takahiro; Tokyo Medical University, Department of General Medicine and Primary Care<br>Takamiya, Tomoko; Tokyo Medical University, Department of Preventive Medicine and Public Health<br>Kawai, Takashi; Tokyo Medical University, Department of Gastroenterological Endoscopy |
| <b>Primary Subject Heading</b>: | Epidemiology                                                                                                                                                                                                                                                                                                                                                                                                                                                                                                                                                                                                                                                                                                                                                                                                                                                                                 |
| Secondary Subject Heading:      | Infectious diseases, Gastroenterology and hepatology, Health policy                                                                                                                                                                                                                                                                                                                                                                                                                                                                                                                                                                                                                                                                                                                                                                                                                          |
| Keywords:                       | Gastrointestinal infections < GASTROENTEROLOGY, Gastrointestinal tumours < GASTROENTEROLOGY, HEALTH ECONOMICS, Health policy < HEALTH SERVICES ADMINISTRATION & MANAGEMENT, Epidemiology < INFECTIOUS DISEASES, PREVENTIVE MEDICINE                                                                                                                                                                                                                                                                                                                                                                                                                                                                                                                                                                                                                                                          |
|                                 |                                                                                                                                                                                                                                                                                                                                                                                                                                                                                                                                                                                                                                                                                                                                                                                                                                                                                              |

SCHOLARONE™  
Manuscripts



I, the Submitting Author has the right to grant and does grant on behalf of all authors of the Work (as defined in the below author licence), an exclusive licence and/or a non-exclusive licence for contributions from authors who are: i) UK Crown employees; ii) where BMJ has agreed a CC-BY licence shall apply, and/or iii) in accordance with the terms applicable for US Federal Government officers or employees acting as part of their official duties; on a worldwide, perpetual, irrevocable, royalty-free basis to BMJ Publishing Group Ltd ("BMJ") its licensees and where the relevant Journal is co-owned by BMJ to the co-owners of the Journal, to publish the Work in this journal and any other BMJ products and to exploit all rights, as set out in our [licence](#).

The Submitting Author accepts and understands that any supply made under these terms is made by BMJ to the Submitting Author unless you are acting as an employee on behalf of your employer or a postgraduate student of an affiliated institution which is paying any applicable article publishing charge ("APC") for Open Access articles. Where the Submitting Author wishes to make the Work available on an Open Access basis (and intends to pay the relevant APC), the terms of reuse of such Open Access shall be governed by a Creative Commons licence – details of these licences and which [Creative Commons](#) licence will apply to this Work are set out in our licence referred to above.

Other than as permitted in any relevant BMJ Author's Self Archiving Policies, I confirm this Work has not been accepted for publication elsewhere, is not being considered for publication elsewhere and does not duplicate material already published. I confirm all authors consent to publication of this Work and authorise the granting of this licence.

1 **Changes in prevalence of *Helicobacter pylori* in Japan from 2008 to 2018: a repeated**  
2 **cross-sectional study**

3 **Author names:** Soichiro Abiko<sup>1</sup>, Yoji Hirayama<sup>1</sup>, Junji Otaki<sup>2 1</sup>, Yoshimi Harada<sup>2 1</sup>, Kohei  
4 Kawakami<sup>1</sup>, Takahiro Toi<sup>1</sup>, Tomoko Takamiya<sup>3</sup>, Takashi Kawai<sup>4</sup>

5 **Author Affiliations:**

6 1. Department of General Medicine and Primary Care, Tokyo Medical University, Tokyo,  
7 Japan.

8 2. Department of Medical Education, Tokyo Medical University, Tokyo, Japan.

9 3. Department of Preventive Medicine and Public Health, Tokyo Medical University, Tokyo,  
10 Japan.

11 4. Department of Gastroenterological Endoscopy, Tokyo Medical University, Tokyo, Japan.

12 **Corresponding Author:** Soichiro Abiko

13 Email: s\_abiko1@tokyo-med.ac.jp

14 **Word count:** 2,903

15  
16 **ABSTRACT**

17 **Objectives:** To understand the recent prevalence and time-trends of *Helicobacter pylori*  
18 infection rates in the Japanese population.

19 **Design:** Repeated cross-sectional study

1  
2  
3  
4  
5 20 **Participants:** A total of 22,120 workers (age: 35–65 years) from one Japanese company,  
6  
7  
8 21 who underwent serum *H. pylori* antibody tests in a health checkup between 2008 and 2018.

9  
10 22 **Measures:** *H. pylori* infection rates among participants aged 35 years from 2008 to 2018,  
11  
12  
13 23 and participants aged 35, 40, 45, and 50–65 years in 2018, based on the results of serum  
14  
15  
16 24 antibody tests were analyzed. In the 2018 analysis, in addition to the antibody test results, all  
17  
18  
19 25 participants who had undergone eradication treatment for *H. pylori* were considered as  
20  
21  
22 26 infected. Trends were examined using Joinpoint analysis.

23  
24 27 **Results:** *H. pylori* were detected in 1,100 of 7,586 male, and 190 of 1,739 female participants  
25  
26  
27 28 aged 35 years. Annual infection rates among those aged 35 years showed linear downward  
28  
29  
30 29 trends as follows: men, 17.5% in 2008 to 10.1% in 2018 (slope:  $-0.66$ ); women, 12.3% in  
31  
32  
33 30 2008 to 9.2% in 2018 (slope:  $-0.51$ ) without joinpoints. In the 2018 analysis, 2,432 of 9,580  
34  
35  
36 31 men and 431 of 1,854 women were *H. pylori* positive. Infection rates tended to increase with  
37  
38  
39 32 older age (men: 11.0% [35 years] to 47.7% [65 years], women: 10.0% [35 years] to 40.0%  
40  
41  
42 33 [65 years]), and showed joinpoints in both sexes (men: 54 years, women: 45 years). Although  
43  
44  
45 34 both the first and second trends were upward, the second trends for both men and women  
46  
47  
48 35 were steeper than the first trends ( $P < 0.05$ ).

49  
50 36 **Conclusions:** Our study demonstrated that in the previous 11 years, infection rates of *H.*  
51  
52  
53 37 *pylori* in Japanese 35-year-old male and female workers have constantly decreased, and  
54  
55  
56 38 furthermore, analysis of various age groups showed joinpoints around 50 years, suggesting a

1  
2  
3  
4  
5 39 consistent declining trend in *H. pylori* infection rates in Japan.  
6  
7  
8 40

### 9 10 41 **Strengths and limitations of this study**

11  
12  
13 42 • This study presents a recent 11-year time trend of *H. pylori* infection rates based on *H.*  
14  
15 43 *pylori* serum antibody test results of 35-year-old workers from one large company with many  
16  
17  
18 44 branches around Japan, using Joinpoint trend analysis.  
19

20  
21 45  
22  
23 46 • The 2018 data compared infection rates by age group (35, 40, 45, and 50–65 years), taking  
24  
25  
26 47 into account the history of *H. pylori* eradication treatment obtained by a questionnaire, in  
27  
28  
29 48 addition to antibody testing.  
30

31 49  
32  
33  
34 50 • The main limitation of this study is the generalizability of the results to the general  
35  
36  
37 51 Japanese population because the study subjects were company employees.  
38  
39  
40 52

41  
42  
43  
44  
45 53

## 46 54 **INTRODUCTION**

47 55 *Helicobacter pylori* (*H. pylori*) is a gram-negative bacterium that is often found in the human  
48  
49  
50 56 stomach. *H. pylori* infection is known to be closely associated with chronic gastritis,  
51  
52  
53 57 duodenal ulcers, gastric ulcers, gastric mucosa-associated lymphoid tissue lymphoma, and  
54  
55  
56  
57  
58  
59  
60

1  
2  
3  
4  
5 58 gastric cancer.<sup>1 2 3 4</sup> The International Agency for Research on Cancer Working group, which  
6  
7  
8 59 is a part of the World Health Organization (WHO), classified *H. pylori* as a Group 1  
9  
10  
11 60 carcinogen for gastric cancer in 1994.<sup>5</sup> Moreover, the WHO has stated that “*H. pylori*  
12  
13 61 screening and treatment strategies would be cost-effective” for asymptomatic populations to  
14  
15  
16 62 prevent gastric cancer, and has recommended that “countries explore the possibility of  
17  
18 63 introducing population-based *H. pylori* screening and treatment programmes”.<sup>6</sup>  
19  
20  
21 64  
22  
23  
24 65 *H. pylori* test-and-treat strategy for preventing gastric cancer is considered more effective in  
25  
26 66 regions with a high incidence of gastric cancer.<sup>7</sup> The incidence and mortality rates of gastric  
27  
28  
29 67 cancer are relatively high in Japan compared with other countries. Moreover, *H. pylori*  
30  
31  
32 68 infection is thought to be involved in more than 90% of gastric cancer cases in Japan.<sup>8 9</sup> In  
33  
34  
35 69 addition, the infection rate of *H. pylori* in Japan is higher than that in other developed  
36  
37  
38 70 countries.<sup>10</sup> Accordingly, the “test-and-treat” strategy for *H. pylori* could be a good measure  
39  
40  
41 71 for preventing gastric cancer in Japan. In 2013, the national health insurance scheme covered  
42  
43  
44 72 the *H. pylori* eradication therapy for chronic gastritis in Japan. Several groups in Japan,  
45  
46  
47 73 including company health insurance societies and local municipalities, have introduced *H.*  
48  
49  
50 74 *pylori* screening tests for asymptomatic people during medical check-ups for the prophylactic  
51  
52  
53 75 intervention of gastric cancer.  
54  
55  
56  
57  
58  
59  
60 76



1  
2  
3  
4  
5 77 Decreasing the *H. pylori* infection rate could reduce the incidence rate of gastric cancer<sup>11</sup> and  
6  
7  
8 78 reduce the positive predictive value of *H. pylori* screening. Therefore, decreasing the *H.*  
9  
10 79 *pylori* infection rate in the population may negatively affect the cost-effectiveness of the  
11  
12  
13 80 “test-and-treat” strategy for asymptomatic groups. It is important to elucidate the current  
14  
15  
16 81 prevalence of *H. pylori* infection and its trends over time, to predict future infection rates and  
17  
18  
19 82 plan test strategies for the future. There has been a decrease in the worldwide prevalence of  
20  
21 83 *H. pylori*,<sup>10</sup> with several Japanese studies reporting similar results.<sup>12</sup> However, most of these  
22  
23  
24 84 studies had small sample sizes or included specific participants, including hospital visitors.  
25  
26  
27 85 To our knowledge, there have been no recent large-scale studies on the prevalence and time-  
28  
29 86 trend of infection rates of *H. pylori* in Japan.<sup>12 13 14</sup> In addition, several studies have reported  
30  
31  
32 87 that the *H. pylori* infection rates become steady at approximately 10% in several low-  
33  
34  
35 88 prevalence regions, including European countries.<sup>10 15 16</sup> Watanabe et al. analyzed the  
36  
37  
38 89 prevalence of *H. pylori* infection by birth-year among first-visit outpatients between 2005 to  
39  
40  
41 90 2013 in Nagoya, Japan. The results showed three trends: the birth-year percent change (BPC)  
42  
43  
44 91 = -1.15% in patients born between 1927 and 1949, BPC = -4.59% in patients born between  
45  
46  
47 92 1949 and 1961, and BPC = -2.04% in patients born between 1961 and 1988, indicating that  
48  
49  
50 93 after a rapid decrease in infection rates in those born between 1949 and 1961, the rate of  
51  
52  
53 94 decrease has slowed down.<sup>14</sup> Our present study aimed to elucidate the recent trends in the  
54  
55  
56 95 infection rates of *H. pylori*, including the rates after 2013, which is the year that the health

1  
2  
3  
4  
5 96 insurance system in Japan began to cover *H. pylori* eradication therapy for chronic gastritis,  
6  
7  
8 97 and whether they showed significant changes with time.  
9

10 98  
11  
12  
13 99 Using data from health checkups in a company health insurance society, this repeated cross-  
14  
15  
16 100 sectional study aimed to clarify the recent 11-year trend of *H. pylori* infection rate in 35-year-  
17  
18 101 olds and *H. pylori* infection rates in 2018 according to age, stratified by sex.  
19  
20

21 102

## 22 23 103 **MATERIALS AND METHODS**

24  
25  
26 104 Japanese law requires all citizens to have some type of health insurance. T company is one  
27  
28  
29 105 of the largest companies in Japan, with many branches. All workers of this company, which  
30  
31  
32 106 includes a wide variety of people, such as office workers, manual laborers, and people with  
33  
34 107 disabilities, belong to the company's health insurance society. Members of the T company  
35  
36  
37 108 health insurance society undergo serum anti-*Helicobacter pylori* IgG antibody tests. This test  
38  
39  
40 109 was conducted annually on members aged 35 years during their health checkups  
41  
42 110 (approximately 600–1,100 people per year). However, in 2018, the health insurance society  
43  
44  
45 111 offered this test to participants aged 35, 40, 45, and > 50 years. We included members who  
46  
47  
48 112 had undergone serum *H. pylori* antibody tests at their annual health checkups from April 1,  
49  
50 113 2008, to March 31, 2019, at the age of 35–65 years. Participants' blood samples were taken  
51  
52  
53 114 at their health checkups. Serum was isolated from the samples, and stored at –80 °C until  
54  
55  
56  
57  
58  
59  
60

1  
2  
3  
4  
5 115 use. Serum anti-*H. pylori* IgG was measured using an enzyme-linked immunosorbent assay  
6  
7  
8 116 with “E-Plate Eiken *H. pylori* antibody” or “E-Plate II Eiken *H. pylori* antibody” (Eiken  
9  
10 117 Chemical Co. Ltd., Tokyo, Japan). The cut-off level was set at 10 U/mL,<sup>17</sup> with values above  
11  
12  
13 118 this being classified as positive. Anonymized participants’ data, including medical  
14  
15  
16 119 questionnaires and blood test results, were obtained from the annual health checkup database  
17  
18 120 of the health insurance society. We excluded data from individuals who refused academic  
19  
20  
21 121 use of their data.  
22  
23  
24 122

### 26 123 **Statistical analysis**

28  
29 124 First, data obtained from 35-year-old participants between 2008 and 2018 were analyzed to  
30  
31  
32 125 determine time-trends in *H. pylori* infection rates (“35-year-old analysis”) stratified by sex.  
33  
34 126 Positive results of serum antibody tests for *H. pylori* were defined as *H. pylori* infection.  
35  
36  
37 127 Annual infection rates were calculated based on the antibody test results. Subsequently, we  
38  
39  
40 128 analyzed the time-trend of the rates.  
41  
42  
43 129

44  
45 130 Second, we analyzed data from participants aged 35, 40, 45, and 50–65 years old obtained in  
46  
47  
48 131 2018 according to age stratified by sex to determine generational differences in the infection  
49  
50  
51 132 rates (“2018 analysis”). In the 2018 analysis, participants who tested positive for antibodies  
52  
53 133 were considered as infected. Further, to reduce the influence of eradication treatment on the  
54  
55  
56  
57  
58  
59  
60

1  
2  
3  
4  
5 134 infection rate, all participants with a history of eradication treatment of *H. pylori* infection  
6  
7  
8 135 were defined as positive regardless of their tests results for *H. pylori* antibody, with the  
9  
10 136 assumption that a history of eradication treatment indicates a previous infection.  
11  
12

13 137  
14  
15 138 We performed Joinpoint Trend Analysis<sup>18</sup> to identify trends in the infection rate and their  
16  
17  
18 139 changes over time using Joinpoint Regression Program 4.9.0.0.<sup>19</sup> We used the permutation  
19  
20  
21 140 test to select the optimal number of joinpoints in the 35-year-old analysis, whereas we used  
22  
23  
24 141 the Bayesian Information Criterion (BIC) in the 2018 analysis. Linear Model was selected in  
25  
26 142 the analyses. Statistical significance was set at  $P < 0.05$ . Data with missing or ambiguous  
27  
28  
29 143 figures were excluded from the analysis.  
30  
31

#### 32 144 33 34 145 **Patient and public involvement**

35  
36  
37 146 After discussions with representatives of the health insurance society about this study, the  
38  
39  
40 147 health insurance society acknowledged the importance of our study, and permitted us to  
41  
42  
43 148 collect and use participant data from its database. The results of this study are published as a  
44  
45 149 report.  
46  
47

#### 48 150 49 50 151 **Ethical approval**

51  
52  
53 152 This study protocol was reviewed and approved by the Institutional Review Board of Tokyo  
54  
55  
56  
57  
58  
59  
60

1  
2  
3  
4  
5 153 Medical University (T2019-0044). Following the Ethical Guidelines for Medical and Health  
6  
7  
8 154 Research Involving Human Subjects,<sup>20</sup> the study information was shown on the websites of  
9  
10  
11 155 the institutions where the researchers or participants belonged. Participants' consent for using  
12  
13 156 data was obtained through an opt-out option.  
14  
15  
16  
17

## 18 158 **RESULTS**

19  
20  
21 159 There were 9,793 and 12,327 participants in the 35-year-old and 2018 analyses, respectively,  
22  
23  
24 160 with 592 participants overlapping in both analyses. In the 35-year-old analysis, 468  
25  
26 161 participants were excluded for having missing (n = 314) or ambiguous data (n = 154) in the  
27  
28  
29 162 records, with 9,325 participants (7,586 men; 1,739 women) being included in the final  
30  
31  
32 163 analysis. In the 2018 analysis, 893 participants were excluded for having missing (n = 875)  
33  
34 164 or ambiguous data (n = 18) in the records, with 11,434 participants (9,580 men; 1,854  
35  
36  
37 165 women) being included in the final analysis (Figure 1).  
38  
39  
40  
41

### 42 167 **The 35-year-old analysis**

43  
44  
45 168 In the 35-year-old analysis, 1,100 out of 7,586 male participants and 190 out of 1,739 female  
46  
47  
48 169 participants were *H. pylori*-infected. In Joinpoint analysis, infection rates showed linear  
49  
50  
51 170 downward trends in both men and women with increasing years (men: 17.5% in 2008 to  
52  
53 171 10.1% in 2018 (slope  $-0.66$ ), women: 12.3% in 2008 to 9.2% in 2018 (slope  $-0.51$ ) [ $P <$   
54  
55  
56  
57  
58  
59  
60

1  
2  
3  
4  
5 172 0.05]). These trends lacked joinpoints at which the trend significantly changed (Figure 2).  
6  
7

8 173  
9

### 10 174 **The 2018 analysis**

11  
12  
13 175 In the 2018 analysis, 2,432 out of 9,580 male participants and 431 out of 1,854 female  
14  
15 176 participants were infected with *H. pylori*. The infection rates showed trends of increasing  
16  
17  
18 177 positive rates with advanced age in both men and women (men: 11.0% at 35 years to 47.7%  
19  
20  
21 178 at 65 years, women: 10.0% at 35 years to 40.0% at 65 years). These trends had joinpoints at  
22  
23  
24 179 the age of 54 years in men (95% CI: 45–58) and at the age of 45 in women (95% CI: 45–51),  
25  
26 180 with two different trends in the slope before and after the point. Specifically, the first and  
27  
28  
29 181 second trends were 35–54 years (slope = 0.67) and 54–65 years (slope = 1.83) in men, and  
30  
31 182 35–45 years (slope = 0.30) and 45–65 years (slope = 1.49) in women. Both first and second  
32  
33  
34 183 trends showed a linear increase with age, with the second trends being significantly steeper  
35  
36  
37 184 than the first trends ( $P < 0.05$ ) (Figure 3).  
38  
39

40 185

## 41 42 186 **DISCUSSION**

43  
44  
45 187 This study investigated the 11-year time-trend from 2008 to 2018, and the trend by age in  
46  
47  
48 188 2018 regarding the prevalence of *H. pylori* infection in Japanese workers stratified by sex  
49  
50  
51 189 based on large-scale health checkup data. In the 35-year-old analysis, the infection rate  
52  
53 190 showed a linear declining trend from 2008 to 2018 both in men and women. This provided a  
54  
55  
56  
57  
58  
59  
60

1  
2  
3  
4  
5 191 good estimate of the *H. pylori* infection trends in Japan, as the subjects of this study were  
6  
7  
8 192 workers in a large company, including workers in the branch offices.  
9

10  
11 193  
12  
13 194 In the 35-year-old analysis, the infection rate decreased linearly to approximately 10% both  
14  
15 195 in men and women; further, this downward trend did not significantly change during the  
16  
17  
18 196 observation period. We assumed that the participants in this analysis, who were all 35 years  
19  
20  
21 197 old were less affected by eradication treatment than older participants; and therefore, the  
22  
23  
24 198 results may closely reflect the actual trend of the incidence rate of *H. pylori* infections in  
25  
26 199 Japan. If the downward trends (slope =  $-0.65$  in men and slope =  $-0.51$  in women) observed  
27  
28  
29 200 in the 35-year-old analysis continues, the infection rate is expected to reach nearly zero by  
30  
31  
32 201 about 2035. In contrast, recent studies on junior high school students (aged: 12–15 years) in  
33  
34  
35 202 Japan have demonstrated that the infection rate of this generation when they reach 35 years  
36  
37 203 at about 2035 will be approximately 3% to 5%,<sup>21 22 23 24</sup> which is higher than our prediction.  
38  
39  
40 204 This inconsistency suggests that the decrease in the infection rate may have slowed down.  
41

42 205  
43  
44  
45 206 In the 2018 analysis, the infection rates in both sexes increased with advanced age. This also  
46  
47  
48 207 indicated declining trends in the prevalence rate of *H. pylori* over the years. Furthermore,  
49  
50  
51 208 there were joinpoints around the age of 50 years (54 years in men [95% CI: 45–58] and 45  
52  
53 209 years in women [95% CI: 45–51]), which implies the existence of some type of change  
54  
55  
56  
57  
58  
59  
60

1  
2  
3  
4  
5 210 affecting the *H. pylori* infection rate in people of this generations (Figure 3). Chronic *H.*  
6  
7  
8 211 *pylori* infection is mostly established in the human stomach during childhood.<sup>25 26</sup> Drinking  
9  
10  
11 212 water and family members are among the sources of *H. pylori* infection.<sup>27</sup> From the late 1960s  
12  
13 213 to the 1970s, which is when people aged 50 years in 2018 spent their childhood, Japan  
14  
15 214 experienced rapid economic growth and urbanization. Accordingly, there was an accelerated  
16  
17  
18 215 increase in water supply and a decrease in the average number of households.<sup>28 29</sup> These fast  
19  
20  
21 216 environmental changes may have influenced the establishment of *H. pylori* infection;  
22  
23  
24 217 consequently, there was a sharp decrease in the prevalence of this bacterial infection during  
25  
26  
27 218 this era. Watanabe et al. revealed changes in the declining trend of *H. pylori* infection rate  
28  
29 219 and indicated an effect of environmental changes on the infection rate,<sup>14</sup> which is consistent  
30  
31  
32 220 with our findings.

33  
34 221  
35  
36  
37 222 Participants in the 35-year-old analysis were born after 1973; therefore, they may have not  
38  
39  
40 223 experienced the rapid environmental changes that those who were born during the period of  
41  
42  
43 224 high economic growth (1955–1972) had experienced. The 35-year-old analysis revealed a  
44  
45  
46 225 recent gradual decrease in the *H. pylori* infection rate. This suggests that factors other than  
47  
48  
49 226 hygiene and family structure may influence infection establishment. As aforementioned, *H.*  
50  
51  
52 227 *pylori* infections are likely to be established during childhood through parent-to-child  
53  
54  
55 228 transmission.<sup>26</sup> In addition to hygienic and environmental improvements, the spread of ready-



1  
2  
3  
4  
5 229 made baby food after around 1970 may have contributed to the decreased *H. pylori* infection  
6  
7  
8 230 rate.<sup>30</sup> With the recently increasing recognition of *H. pylori* in the general population and  
9  
10  
11 231 coverage of eradication treatment through national insurance, there has been an increase in  
12  
13 232 the number of *H. pylori* eradication treatments in Japan.<sup>31</sup> If treatment decreases the infection  
14  
15  
16 233 rate in child-rearing generation, it could accelerate the declining speed of the infection rates  
17  
18 234 in the next generations.

20  
21 235

22  
23  
24 236 When conducting *H. pylori* screening tests for prophylactic purposes, the prevalence in a  
25  
26 237 target group should be considered to evaluate the effectiveness of the strategy. We observed  
27  
28  
29 238 a decreasing infection rate of *H. pylori* in Japan. In the future, the infection rate may reach  
30  
31  
32 239 zero; accordingly, there would be a decreased importance of screening tests for this bacterium  
33  
34  
35 240 in asymptomatic people. A study on the cost-effectiveness of the test-and-treatment strategy  
36  
37 241 for *H. pylori* revealed that it remained effective even with a low infection rate of  
38  
39  
40 242 approximately 5%.<sup>32</sup> Our findings could inform future public health strategies. Moreover,  
41  
42 243 considering the decrease in *H. pylori* prevalence, *H. pylori* infection-negative gastric cancer  
43  
44  
45 244 has lately been receiving attention.<sup>33 34 35</sup> Research for risk factors of gastric cancer other  
46  
47  
48 245 than *H. pylori* is also needed.

49  
50 246

51  
52  
53 247 **Limitations**

1  
2  
3  
4  
5 248 This study has several limitations. First, there might have been selection bias, including age,  
6  
7  
8 249 sex, occupation, region, and nationality (possibly including several workers who were born  
9  
10 250 and raised in countries other than Japan). Several studies have analyzed differences in the  
11  
12  
13 251 infection rates according to sex, occupation, and region, with a study reporting a higher  
14  
15  
16 252 infection rate in men; however, there remains no consensus regarding these biases.<sup>36 37 38</sup> Our  
17  
18 253 present study included participants of an unequal number of each sex. This was one reason  
19  
20  
21 254 why we conducted separate analyses for each sex. A recent study showed that employees in  
22  
23  
24 255 a large company are in better health than those in a small one.<sup>39</sup> As the target group of this  
25  
26 256 study were employees of a large company, there is the possibility of such bias. Heterogeneity  
27  
28  
29 257 of age gaps between age groups and limitation of the target ages may have weakened analyses,  
30  
31  
32 258 especially in younger age groups. However, the present study targeted all health insurance  
33  
34 259 society members working in a large company operating throughout Japan, and therefore, we  
35  
36  
37 260 were able to include subjects from various age groups and regions throughout Japan. Second,  
38  
39  
40 261 the history of *H. pylori* eradication may have influenced our findings. In 2008, T company  
41  
42 262 health insurance society performed serum *H. pylori* antibody screening tests for all its  
43  
44  
45 263 members. Therefore, there may have been a higher proportion of post-eradication cases in  
46  
47  
48 264 our study than in the general population. We attempted to reduce the influence of eradication  
49  
50  
51 265 treatment by classifying patients who underwent eradication treatment as infected. However,  
52  
53 266 history information acquired through a self-reported questionnaire could have contained  
54  
55  
56  
57  
58  
59  
60

1  
2  
3  
4  
5 267 inaccuracies, including recall bias.<sup>40</sup> In the 35-year-old analysis, we could not obtain  
6  
7  
8 268 information regarding previous eradication treatment of the participants. We hence analyzed  
9  
10 269 the data based on the assumption that the rate of eradication treatment among participants in  
11  
12  
13 270 the 35-year-old analysis was low, due to their younger age, and therefore would not  
14  
15  
16 271 significantly affect the infection rate. The health insurance society collected and reported, as  
17  
18 272 part of their health services, that the rate of 35-year-old participants who had previously  
19  
20  
21 273 undergone eradication treatment (both men and women) was 0.9%, 2.1%, and 1.4% in 2018,  
22  
23  
24 274 2019, and 2020, respectively. Although this supports our assumption, it indicates the  
25  
26 275 possibility of errors of 1%–2 % from eradication treatment in the infection rates of the 35-  
27  
28  
29 276 year-old analysis. In addition, previous medical history; medications; and measurement  
30  
31  
32 277 biases, including test characteristics and threshold application in the test (including high-  
33  
34 278 negative issues), could have influenced our results.<sup>41 42</sup> The limitations mentioned above may  
35  
36  
37 279 hinder the generalization of our findings to the Japanese general population.  
38  
39  
40 280

41  
42 281 However, the present study collected data of 35-year-olds from 2009 to 2018, and data also  
43  
44  
45 282 of various age groups from 2018, and this information was analyzed using a robust statistical  
46  
47  
48 283 method called joinpoint analysis, demonstrating important findings for considering future *H.*  
49  
50 284 *pylori* eradication therapy targets.  
51  
52

53 285  
54  
55  
56  
57  
58  
59  
60

## 286 **CONCLUSION**

287 Our study showed a constant decreasing time-trend in the infection rate of *H. pylori* among  
288 35-year-old workers in Japan from 2008 to 2018 <sup>43</sup>. This time-trend indicates that the  
289 infection rate of *H. pylori* may continue to decrease in the future. Trends in the infection rate  
290 by age in 2018 indicated the possibility of a slowing down of the rate of decrease in the  
291 prevalence of *H. pylori* in Japan. In populations with few *H. pylori*-positive individuals, the  
292 efficiency of measures to routinely test for antibodies is low, and therefore, it would be  
293 difficult to rely solely on the *H. pylori* test and treatment strategy to achieve gastric cancer  
294 prevention. We believe that the data regarding changes in the prevalence of *H. pylori* over  
295 the years observed in Japan could be useful for other countries with a high incidence of *H.*  
296 *pylori* infection, in planning future eradication strategies.

297

## 298 **Acknowledgments**

299 We would like to acknowledge the T company health insurance society. We would like to  
300 thank the Center for International Education and Research of Tokyo Medical University for  
301 English language editing.

302

## 303 **Footnotes**

304 **Contributors:** SA designed the study, analyzed the data, and drafted the manuscript. Y

1  
2  
3  
4  
5 305 Hirayama contributed to the study design and performed general supervision of the whole  
6  
7  
8 306 study. JO, Y Harada, and T Toi assisted in conducting the study, interpreting the results, and  
9  
10  
11 307 revising the manuscript. KK and TK contributed to data collection and provided advice and  
12  
13 308 opinions from an expert perspective. TT contributed to data analysis and revising the  
14  
15  
16 309 manuscript from statistical and public health perspectives. All authors read and approved the  
17  
18 310 final manuscript.

19  
20  
21 311  
22  
23 312 **Funding:** This research received no specific grant from any funding agency in the public,  
24  
25  
26 313 commercial, or not-for-profit sectors.

27  
28  
29 314  
30  
31 315 **Competing interests:** None declared.

32  
33  
34 316  
35  
36 317 **Patient consent for publication:** Not required.

37  
38  
39 318  
40  
41  
42 319 **Ethics approval:** The institutional review boards of Tokyo Medical University (T2019-  
43  
44  
45 320 0044)

46  
47  
48 321  
49  
50 322 **Provenance and peer review:** Not commissioned; externally peer-reviewed.

51  
52  
53 323  
54  
55  
56  
57  
58  
59  
60

324 **Data sharing statement:** Data is available in a public, open access repository.<sup>43</sup>

325

326

## 327 REFERENCES

- 328 1. Wang F, Meng W, Wang B, et al. Helicobacter pylori-induced gastric inflammation and  
329 gastric cancer. *Cancer Lett* 2014;345(2):196-202. doi: 10.1016/j.canlet.2013.08.016  
330 [published Online First: 2013/08/29]
- 331 2. Huang JQ, Sridhar S, Hunt RH. Role of Helicobacter pylori infection and non-steroidal  
332 anti-inflammatory drugs in peptic-ulcer disease: a meta-analysis. *Lancet*  
333 2002;359(9300):14-22. doi: 10.1016/s0140-6736(02)07273-2 [published Online  
334 First: 2002/01/26]
- 335 3. Eck M, Schmausser B, Haas R, et al. MALT-type lymphoma of the stomach is associated  
336 with Helicobacter pylori strains expressing the CagA protein. *Gastroenterology*  
337 1997;112(5):1482-6. doi: 10.1016/s0016-5085(97)70028-3 [published Online First:  
338 1997/05/01]
- 339 4. Sasazuki S, Inoue M, Iwasaki M, et al. Effect of Helicobacter pylori infection combined  
340 with CagA and pepsinogen status on gastric cancer development among Japanese  
341 men and women: a nested case-control study. *Cancer Epidemiol Biomarkers Prev*  
342 2006;15(7):1341-7. doi: 10.1158/1055-9965.EPI-05-0901 [published Online First:

1  
2  
3  
4  
5 343 2006/07/13]  
6

7  
8 344 5. IARC Working Group on the Evaluation of Carcinogenic Risks to Humans. Schistosomes,  
9  
10 345 Liver Flukes and *Helicobacter pylori*. Lyon (FR): International Agency for Research  
11  
12  
13 346 on Cancer 1994.

14  
15  
16 347 6. IARC *Helicobacter pylori* Working Group. *Helicobacter pylori* Eradication as a Strategy  
17  
18 348 for Preventing Gastric Cancer: International Agency for Research on Cancer 2014.

19  
20  
21 349 7. Ford AC, Forman D, Hunt RH, et al. *Helicobacter pylori* eradication therapy to prevent  
22  
23 350 gastric cancer in healthy asymptomatic infected individuals: systematic review and  
24  
25  
26 351 meta-analysis of randomised controlled trials. *BMJ* 2014;348:g3174. doi:  
27  
28  
29 352 10.1136/bmj.g3174

30  
31 353 8. Center for Cancer Control and Information Services, National Cancer Center. CANCER  
32  
33 354 STATISTICS IN JAPAN '19 [updated 17 April 2020. Available from:  
34  
35  
36 355 [https://ganjoho.jp/en/professional/statistics/brochure/2019\\_en.html](https://ganjoho.jp/en/professional/statistics/brochure/2019_en.html) accessed 22 Dec  
37  
38  
39 356 2020.

40  
41  
42 357 9. Matsuo T, Ito M, Takata S, et al. Low prevalence of *Helicobacter pylori*-negative gastric  
43  
44 358 cancer among Japanese. *Helicobacter* 2011;16(6):415-9. doi: 10.1111/j.1523-  
45  
46  
47 359 5378.2011.00889.x [published Online First: 2011/11/09]

48  
49  
50 360 10. Peleteiro B, Bastos A, Ferro A, et al. Prevalence of *Helicobacter pylori* infection  
51  
52  
53 361 worldwide: a systematic review of studies with national coverage. *Dig Dis Sci*

- 1  
2  
3  
4  
5 362 2014;59(8):1698-709. doi: 10.1007/s10620-014-3063-0 [published Online First:  
6  
7  
8 363 2014/02/25]
- 9  
10 364 11. Tsuda M, Asaka M, Kato M, et al. Effect on *Helicobacter pylori* eradication therapy  
11  
12  
13 365 against gastric cancer in Japan. *Helicobacter* 2017;22(5) doi: 10.1111/hel.12415  
14  
15 366 [published Online First: 2017/08/05]
- 16  
17  
18 367 12. Wang C, Nishiyama T, Kikuchi S, et al. Changing trends in the prevalence of *H. pylori*  
19  
20  
21 368 infection in Japan (1908-2003): a systematic review and meta-regression analysis of  
22  
23 369 170,752 individuals. *Sci Rep* 2017;7(1):15491. doi: 10.1038/s41598-017-15490-7  
24  
25  
26 370 [published Online First: 2017/11/16]
- 27  
28  
29 371 13. Inoue M. Changing epidemiology of *Helicobacter pylori* in Japan. *Gastric Cancer*  
30  
31 372 2017;20(Suppl 1):3-7. doi: 10.1007/s10120-016-0658-5 [published Online First:  
32  
33 373 2016/10/21]
- 34  
35  
36 374 14. Watanabe M, Ito H, Hosono S, et al. Declining trends in prevalence of *Helicobacter pylori*  
37  
38  
39 375 infection by birth-year in a Japanese population. *Cancer Sci* 2015;106(12):1738-43.  
40  
41 376 doi: 10.1111/cas.12821 [published Online First: 2015/09/24]
- 42  
43  
44 377 15. Carmack SW, Genta RM. *Helicobacter pylori* seroprevalence in symptomatic veterans: a  
45  
46  
47 378 study of 7310 patients over 11 years. *Helicobacter* 2009;14(4):298-302. doi:  
48  
49 379 10.1111/j.1523-5378.2009.00693.x
- 50  
51  
52 380 16. den Hoed CM, Vila AJ, Holster IL, et al. *Helicobacter pylori* and the birth cohort effect:  
53  
54  
55  
56  
57  
58  
59  
60



- 1  
2  
3  
4  
5 381 evidence for stabilized colonization rates in childhood. *Helicobacter* 2011;16(5):405-  
6  
7  
8 382 9. doi: 10.1111/j.1523-5378.2011.00854.x [published Online First: 2011/09/20]  
9  
10 383 17. Komatsu Y, Sugiyama T, Asaka M. Helicobacter pylori kansenshingan ni okeru  
11  
12 384 nihonjinkabu wo siyou sita ELISA kit " E-plate eiken H.pylori koutai" no yuyousei  
13  
14 385 no kentou [Study of effectiveness of E-plate eiken which is ELAISA kit using  
15  
16 386 Japanese strain in diagnose of Helicobacter pylori infection]. *The Journal of Clinical*  
17  
18 387 *Laboratory Instruments and Reagents* 2001;24(5):331-35.  
19  
20  
21 388 18. Kim HJ, Fay MP, Feuer EJ, et al. Permutation tests for joinpoint regression with  
22  
23 389 applications to cancer rates. *Stat Med* 2000;19(3):335-51. doi: 10.1002/(sici)1097-  
24  
25 390 0258(20000215)19:3<335::aid-sim336>3.0.co;2-z [published Online First:  
26  
27 391 2000/01/29]  
28  
29  
30 392 19. Joinpoint Regression Program [program]. Version 4.9.0.0 version: Statistical  
31  
32 393 Methodology and Applications Branch, Surveillance Research Program, National  
33  
34 394 Cancer Institute., March 2021.  
35  
36  
37 395 20. Ministry of Health, Labour and Welfare. Ethical Guidelines for Medical and Health  
38  
39 396 Research Involving Human Subjects 2015 [Available from:  
40  
41 397 [https://www.mhlw.go.jp/file/06-Seisakujouhou-10600000-](https://www.mhlw.go.jp/file/06-Seisakujouhou-10600000-Daijinkanboukouseikagakuka/0000080278.pdf)  
42  
43 398 [Daijinkanboukouseikagakuka/0000080278.pdf](https://www.mhlw.go.jp/file/06-Seisakujouhou-10600000-Daijinkanboukouseikagakuka/0000080278.pdf) accessed 6 Dec 2020.  
44  
45  
46 399 21. Kusano C, Gotoda T, Ishikawa H, et al. The administrative project of Helicobacter pylori  
47  
48  
49  
50  
51  
52  
53  
54  
55  
56  
57  
58  
59  
60

- 1  
2  
3  
4  
5 400 infection screening among junior high school students in an area of Japan with a high  
6  
7  
8 401 incidence of gastric cancer. *Gastric Cancer* 2017;20(Suppl 1):16-19. doi:  
9  
10 402 10.1007/s10120-017-0688-7 [published Online First: 2017/01/18]  
11  
12  
13 403 22. Honma H, Nakayama Y, Kato S, et al. Clinical features of Helicobacter pylori antibody-  
14  
15 404 positive junior high school students in Nagano Prefecture, Japan. *Helicobacter*  
16  
17 405 2018:e12559. doi: 10.1111/hel.12559 [published Online First: 2018/12/06]  
18  
19  
20  
21 406 23. Nakayama Y, Lin Y, Hongo M, et al. Helicobacter pylori infection and its related factors  
22  
23 407 in junior high school students in Nagano Prefecture, Japan. *Helicobacter* 2017;22(2)  
24  
25 408 doi: 10.1111/hel.12363 [published Online First: 2016/10/28]  
26  
27  
28  
29 409 24. Kakiuchi T, Matsuo M, Endo H, et al. A Helicobacter pylori screening and treatment  
30  
31 410 program to eliminate gastric cancer among junior high school students in Saga  
32  
33 411 Prefecture: a preliminary report. *J Gastroenterol* 2019 doi: 10.1007/s00535-019-  
34  
35 412 01559-9 [published Online First: 2019/02/17]  
36  
37  
38  
39 413 25. Banatvala N, Mayo K, Megraud F, et al. The cohort effect and Helicobacter pylori. *J*  
40  
41 414 *Infect Dis* 1993;168(1):219-21. doi: 10.1093/infdis/168.1.219  
42  
43  
44  
45 415 26. O'Ryan ML, Lucero Y, Rabello M, et al. Persistent and transient Helicobacter pylori  
46  
47 416 infections in early childhood. *Clin Infect Dis* 2015;61(2):211-8. doi:  
48  
49 417 10.1093/cid/civ256  
50  
51  
52  
53 418 27. Ueda M, Kikuchi S, Kasugai T, et al. Helicobacter pylori risk associated with childhood  
54  
55  
56  
57  
58  
59  
60

- 1  
2  
3  
4  
5 419 home environment. *Cancer Sci* 2003;94(10):914-8. doi: 10.1111/j.1349-  
6  
7  
8 420 7006.2003.tb01375.x [published Online First: 2003/10/15]  
9  
10 421 28. JAPAN WATER WORKS ASSOCIATION. Water Supply in Japan 2017 [Available  
11  
12  
13 422 from: [http://www.jwwa.or.jp/jigyoku/kaigai\\_file/2017WaterSupplyInJapan.pdf](http://www.jwwa.or.jp/jigyoku/kaigai_file/2017WaterSupplyInJapan.pdf)  
14  
15 423 accessed Dec 22 2020.  
16  
17  
18 424 29. Ministry of Health, Labour and Welfare. General Welfare and Labour Japan [Available  
19  
20  
21 425 from: <https://www.mhlw.go.jp/english/wp/wp-hw9/dl/01e.pdf> accessed 1st Oct 2020.  
22  
23  
24 426 30. Council JBF. Seisan Tokei [Production statistics] Japan [Available from:  
25  
26 427 <https://www.baby-food.jp/link/ayumi-jikei.html> accessed 11 Dec 2020.  
27  
28  
29 428 31. Hiroi S, Sugano K, Tanaka S, et al. Impact of health insurance coverage for *Helicobacter*  
30  
31 429 *pylori* gastritis on the trends in eradication therapy in Japan: retrospective  
32  
33  
34 430 observational study and simulation study based on real-world data. *BMJ Open*  
35  
36  
37 431 2017;7(7):e015855. doi: 10.1136/bmjopen-2017-015855 [published Online First:  
38  
39  
40 432 2017/08/02]  
41  
42  
43 433 32. Kowada A. Cost-effectiveness of *Helicobacter pylori* screening followed by eradication  
44  
45 434 treatment for employees in Japan. *Epidemiol Infect* 2018;146(14):1834-40. doi:  
46  
47  
48 435 10.1017/S095026881800208X [published Online First: 2018/07/31]  
49  
50  
51 436 33. Kato S, Matsukura N, Tsukada K, et al. *Helicobacter pylori* infection-negative gastric  
52  
53 437 cancer in Japanese hospital patients: Incidence and pathological characteristics.  
54  
55  
56  
57  
58  
59  
60

- 1  
2  
3  
4  
5 438 *Cancer Sci* 2007;98(6):790-94. doi: <https://doi.org/10.1111/j.1349->  
6  
7  
8 439 7006.2007.00478.x  
9  
10  
11 440 34. Yamamoto Y, Fujisaki J, Omae M, et al. Helicobacter pylori-negative gastric cancer:  
12  
13 441 characteristics and endoscopic findings. *Digestive endoscopy : official journal of the*  
14  
15 442 *Japan Gastroenterological Endoscopy Society* 2015;27(5):551-61. doi:  
16  
17 443 10.1111/den.12471 [published Online First: 2015/03/27]  
18  
19  
20  
21 444 35. Takita M, Ohata K, Inamoto R, et al. Endoscopic and histological features of Helicobacter  
22  
23 445 pylori-negative differentiated gastric adenocarcinoma arising in the antrum. *JGH*  
24  
25 446 *open : an open access journal of gastroenterology and hepatology* 2021;5(4):470-77.  
26  
27 447 doi: 10.1002/jgh3.12518 [published Online First: 2021/04/17]  
28  
29  
30  
31 448 36. Kheyre H, Morais S, Ferro A, et al. The occupational risk of Helicobacter pylori infection:  
32  
33 449 a systematic review. *Int Arch Occup Environ Health* 2018;91(6):657-74. doi:  
34  
35 450 10.1007/s00420-018-1315-6  
36  
37  
38  
39 451 37. Ueda J, Gosho M, Inui Y, et al. Prevalence of Helicobacter pylori infection by birth year  
40  
41 452 and geographic area in Japan. *Helicobacter* 2014;19(2):105-10. doi:  
42  
43 453 10.1111/hel.12110 [published Online First: 2014/02/11]  
44  
45  
46  
47 454 38. Ferro A, Morais S, Pelucchi C, et al. Sex differences in the prevalence of Helicobacter  
48  
49 455 pylori infection: an individual participant data pooled analysis (StoP Project). *Eur J*  
50  
51 456 *Gastroenterol Hepatol* 2019;31(5):593-98. doi: 10.1097/MEG.0000000000001389  
52  
53  
54  
55  
56  
57  
58  
59  
60

1  
2  
3  
4  
5 457 [published Online First: 2019/03/07]  
6

7  
8 458 39. Kanamori S, Tsuji T, Takamiya T, et al. Size of company of the longest-held job and  
9  
10 459 mortality in older Japanese adults: A 6-year follow-up study from the Japan  
11  
12 Gerontological Evaluation Study. *J Occup Health* 2020;62(1):e12115. doi:  
13 460 10.1002/1348-9585.12115 [published Online First: 2020/06/10]  
14  
15 461

16  
17  
18 462 40. Coughlin SS. Recall bias in epidemiologic studies. *J Clin Epidemiol* 1990;43(1):87-91.  
19  
20  
21 463 doi: 10.1016/0895-4356(90)90060-3  
22

23  
24 464 41. Miftahussurur M, Yamaoka Y. Diagnostic Methods of Helicobacter pylori Infection for  
25  
26 465 Epidemiological Studies: Critical Importance of Indirect Test Validation. *BioMed*  
27  
28 *research international* 2016;2016:4819423. doi: 10.1155/2016/4819423 [published  
29 466  
30  
31 467 Online First: 2016/02/24]  
32  
33

34 468 42. Inoue M, Sawada N, Goto A, et al. High-Negative Anti-Helicobacter pylori IgG Antibody  
35  
36  
37 469 Titers and Long-Term Risk of Gastric Cancer: Results from a Large-Scale  
38  
39 470 Population-Based Cohort Study in Japan. *Cancer Epidemiol Biomarkers Prev*  
40  
41  
42 471 2020;29(2):420-26. doi: 10.1158/1055-9965.EPI-19-0993 [published Online First:  
43  
44  
45 472 2019/12/13]  
46

47  
48 473 [dataset] 43. Soichiro A. Data from: Changes in prevalence of Helicobacter pylori in Japan  
49  
50 474 from 2008 to 2018: a repeated cross-sectional study, figshare, July 13, 2022  
51  
52  
53 475 <https://doi.org/10.6084/m9.figshare.14594571.v2>  
54  
55  
56  
57  
58  
59  
60

1  
2  
3  
4  
5 476  
6  
7  
8 477  
9

10 478 **FIGURE LEGENDS**

11  
12  
13 479 **Figure 1**

14  
15 480 *Numbers of participants*

16  
17  
18 481

19  
20  
21 482 Figure 1

22  
23 483 *Note.* (a) The 35-year-old analysis: participants aged 35 years from 2008 to 2018. (b) The

24  
25  
26 484 2018 analysis: participants aged 35–65 years in 2018.

27  
28  
29 485

30  
31  
32 486

33  
34 487 **Figure 2:**

35  
36  
37 488 *Infection rates of Helicobacter pylori at 35 years old from 2008 to 2018 (men: n = 7,586,*

38  
39 489 *women: n= 1,739)*

40  
41  
42 490

43  
44  
45 491 Figure 2

46  
47 492 *Note.* Infection rates at 35 years linearly decreased by years. (A) men: 17.5% in 2008 to

48  
49  
50 493 10.1% in 2018 (slope: -0.65). (B) women: 12.3% in 2008 to 9.2% in 2018 (slope: -0.51).

51  
52  
53 494 There were no joinpoints. “\*” in the graph legend indicates a significant difference in the

1  
2  
3  
4  
5 495 slope from zero at the alpha = 0.05 level.  
6  
7  
8 496  
9  
10 497  
11  
12

13 498 **Figure 3**

14  
15 499 *Infection rates of Helicobacter pylori according to age in 2018 (men: n = 9,580, women:*  
16  
17  
18 500 *n=1,854)*

19  
20  
21 501  
22  
23 502 **Figure 3**

24  
25  
26 503 *Note.* Infection rates increased in two trends. (A) men: first trend: 35–54 years [slope = 0.67];  
27  
28 504 second trend: 54–65 years [slope = 1.83]. (B) female: first trend: 35–45 years [slope = 0.30];  
29  
30 505 second trend: 45–65 years [slope = 1.49]). “\*” in the graph legend indicates a significant  
31  
32 506 difference in the slope from zero at the alpha = 0.05 level.  
33  
34  
35  
36

37 507

38  
39 508  
40  
41  
42  
43  
44  
45  
46  
47  
48  
49  
50  
51  
52  
53  
54  
55  
56  
57  
58  
59  
60



Figure 1: *Note.* (a) The 35-year-old analysis: participants aged 35 years from 2008 to 2018. (b) The 2018 analysis: participants aged 35–65 years in 2018.

338x190mm (300 x 300 DPI)



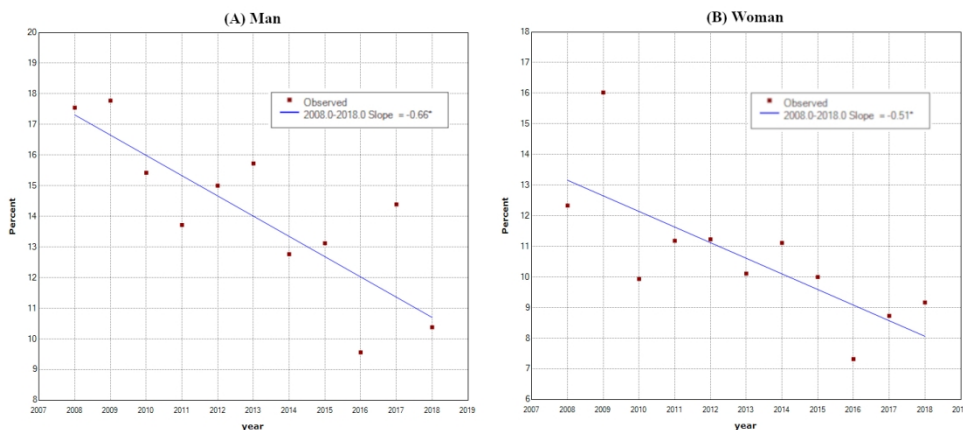

Figure 2: Note. Infection rates at 35 years linearly decreased by years. (A) men: 17.5% in 2008 to 10.1% in 2018 (slope: -0.65). (B) women: 12.3% in 2008 to 9.2% in 2018 (slope: -0.51). There were no joinpoints. "\*" in the graph legend indicates a significant difference in the slope from zero at the alpha = 0.05 level.

32x14mm (1200 x 1200 DPI)

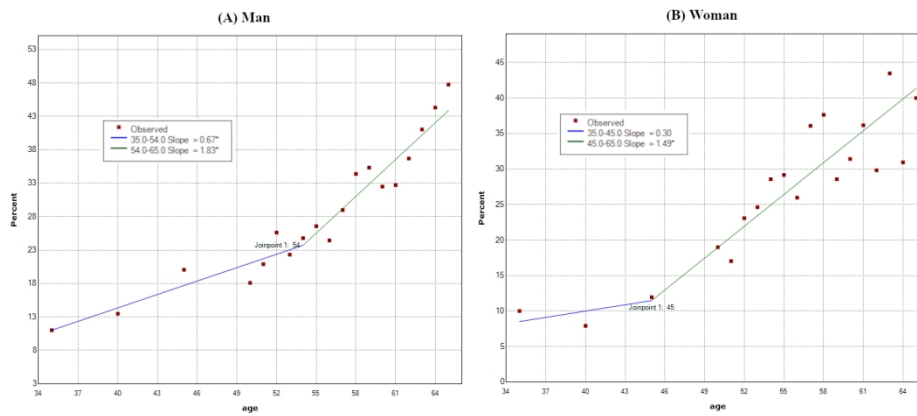

Figure 3: Note. Infection rates increased in two trends. (A) men: first trend: 35–54 years [slope = 0.67]; second trend: 54–65 years [slope = 1.83]. (B) female: first trend: 35–45 years [slope = 0.30]; second trend: 45–65 years [slope = 1.49]. “\*” in the graph legend indicates a significant difference in the slope from zero at the alpha = 0.05 level.

35x15mm (1200 x 1200 DPI)

# Reporting checklist for cross sectional study.

Based on the STROBE cross sectional guidelines.

## Instructions to authors

Complete this checklist by entering the page numbers from your manuscript where readers will find each of the items listed below.

Your article may not currently address all the items on the checklist. Please modify your text to include the missing information. If you are certain that an item does not apply, please write "n/a" and provide a short explanation.

Upload your completed checklist as an extra file when you submit to a journal.

In your methods section, say that you used the STROBE cross sectional reporting guidelines, and cite them as:

von Elm E, Altman DG, Egger M, Pocock SJ, Gøtzsche PC, Vandenbroucke JP. The Strengthening the Reporting of Observational Studies in Epidemiology (STROBE) Statement: guidelines for reporting observational studies.

|                           |                     |                                                                                    | Page   |
|---------------------------|---------------------|------------------------------------------------------------------------------------|--------|
|                           |                     | Reporting Item                                                                     | Number |
| <b>Title and abstract</b> |                     |                                                                                    |        |
| Title                     | <a href="#">#1a</a> | Indicate the study's design with a commonly used term in the title or the abstract | 1      |
| Abstract                  | <a href="#">#1b</a> | Provide in the abstract an informative and balanced summary                        | 1-3    |

of what was done and what was found

## Introduction

|                               |                     |                                                                                                                                                                                                                                                                      |       |
|-------------------------------|---------------------|----------------------------------------------------------------------------------------------------------------------------------------------------------------------------------------------------------------------------------------------------------------------|-------|
| Background /<br>rationale     | <a href="#">#2</a>  | Explain the scientific background and rationale for the investigation being reported                                                                                                                                                                                 | 3-6   |
| Objectives                    | <a href="#">#3</a>  | State specific objectives, including any prespecified hypotheses                                                                                                                                                                                                     | 6     |
| <b>Methods</b>                |                     |                                                                                                                                                                                                                                                                      |       |
| Study design                  | <a href="#">#4</a>  | Present key elements of study design early in the paper                                                                                                                                                                                                              | 6     |
| Setting                       | <a href="#">#5</a>  | Describe the setting, locations, and relevant dates, including periods of recruitment, exposure, follow-up, and data collection                                                                                                                                      | 6-7   |
| Eligibility criteria          | <a href="#">#6a</a> | Give the eligibility criteria, and the sources and methods of selection of participants.                                                                                                                                                                             | 6-7   |
|                               | <a href="#">#7</a>  | Clearly define all outcomes, exposures, predictors, potential confounders, and effect modifiers. Give diagnostic criteria, if applicable                                                                                                                             | 6-8   |
| Data sources /<br>measurement | <a href="#">#8</a>  | For each variable of interest give sources of data and details of methods of assessment (measurement). Describe comparability of assessment methods if there is more than one group. Give information separately for for exposed and unexposed groups if applicable. | 6-8   |
| Bias                          | <a href="#">#9</a>  | Describe any efforts to address potential sources of bias                                                                                                                                                                                                            | 13-15 |
| Study size                    | <a href="#">#10</a> | Explain how the study size was arrived at                                                                                                                                                                                                                            | n/a   |

|    |                  |                      |                                                                   |          |
|----|------------------|----------------------|-------------------------------------------------------------------|----------|
| 1  | Quantitative     | <a href="#">#11</a>  | Explain how quantitative variables were handled in the            | n/a      |
| 2  |                  |                      |                                                                   |          |
| 3  | variables        |                      | analyses. If applicable, describe which groupings were chosen,    |          |
| 4  |                  |                      |                                                                   |          |
| 5  |                  |                      | and why                                                           |          |
| 6  |                  |                      |                                                                   |          |
| 7  |                  |                      |                                                                   |          |
| 8  |                  |                      |                                                                   |          |
| 9  | Statistical      | <a href="#">#12a</a> | Describe all statistical methods, including those used to control | 7-8      |
| 10 |                  |                      |                                                                   |          |
| 11 | methods          |                      | for confounding                                                   |          |
| 12 |                  |                      |                                                                   |          |
| 13 |                  |                      |                                                                   |          |
| 14 | Statistical      | <a href="#">#12b</a> | Describe any methods used to examine subgroups and                | 7-8      |
| 15 |                  |                      |                                                                   |          |
| 16 | methods          |                      | interactions                                                      |          |
| 17 |                  |                      |                                                                   |          |
| 18 |                  |                      |                                                                   |          |
| 19 | Statistical      | <a href="#">#12c</a> | Explain how missing data were addressed                           | 8        |
| 20 |                  |                      |                                                                   |          |
| 21 | methods          |                      |                                                                   |          |
| 22 |                  |                      |                                                                   |          |
| 23 |                  |                      |                                                                   |          |
| 24 |                  |                      |                                                                   |          |
| 25 | Statistical      | <a href="#">#12d</a> | If applicable, describe analytical methods taking account of      | n/a      |
| 26 |                  |                      |                                                                   |          |
| 27 | methods          |                      | sampling strategy                                                 |          |
| 28 |                  |                      |                                                                   |          |
| 29 |                  |                      |                                                                   |          |
| 30 | Statistical      | <a href="#">#12e</a> | Describe any sensitivity analyses                                 | n/a      |
| 31 |                  |                      |                                                                   |          |
| 32 | methods          |                      |                                                                   |          |
| 33 |                  |                      |                                                                   |          |
| 34 |                  |                      |                                                                   |          |
| 35 |                  |                      |                                                                   |          |
| 36 | <b>Results</b>   |                      |                                                                   |          |
| 37 |                  |                      |                                                                   |          |
| 38 |                  |                      |                                                                   |          |
| 39 | Participants     | <a href="#">#13a</a> | Report numbers of individuals at each stage of study—eg           | 9-10     |
| 40 |                  |                      |                                                                   |          |
| 41 |                  |                      | numbers potentially eligible, examined for eligibility, confirmed |          |
| 42 |                  |                      |                                                                   |          |
| 43 |                  |                      | eligible, included in the study, completing follow-up, and        |          |
| 44 |                  |                      |                                                                   |          |
| 45 |                  |                      | analysed. Give information separately for for exposed and         |          |
| 46 |                  |                      |                                                                   |          |
| 47 |                  |                      | unexposed groups if applicable.                                   |          |
| 48 |                  |                      |                                                                   |          |
| 49 |                  |                      |                                                                   |          |
| 50 |                  |                      |                                                                   |          |
| 51 | Participants     | <a href="#">#13b</a> | Give reasons for non-participation at each stage                  | 9        |
| 52 |                  |                      |                                                                   |          |
| 53 |                  |                      |                                                                   |          |
| 54 | Participants     | <a href="#">#13c</a> | Consider use of a flow diagram                                    | 9        |
| 55 |                  |                      |                                                                   |          |
| 56 |                  |                      |                                                                   |          |
| 57 | Descriptive data | <a href="#">#14a</a> | Give characteristics of study participants (eg demographic,       | 6, 14-15 |
| 58 |                  |                      |                                                                   |          |
| 59 |                  |                      |                                                                   |          |
| 60 |                  |                      |                                                                   |          |

clinical, social) and information on exposures and potential confounders. Give information separately for exposed and unexposed groups if applicable.

|    |                   |                      |                                                                                                                                                                                                          |       |
|----|-------------------|----------------------|----------------------------------------------------------------------------------------------------------------------------------------------------------------------------------------------------------|-------|
| 8  | Descriptive data  | <a href="#">#14b</a> | Indicate number of participants with missing data for each variable of interest                                                                                                                          | 9-10  |
| 9  |                   |                      |                                                                                                                                                                                                          |       |
| 10 |                   |                      |                                                                                                                                                                                                          |       |
| 11 |                   |                      |                                                                                                                                                                                                          |       |
| 12 |                   |                      |                                                                                                                                                                                                          |       |
| 13 | Outcome data      | <a href="#">#15</a>  | Report numbers of outcome events or summary measures. Give information separately for exposed and unexposed groups if applicable.                                                                        | 9-10  |
| 14 |                   |                      |                                                                                                                                                                                                          |       |
| 15 |                   |                      |                                                                                                                                                                                                          |       |
| 16 |                   |                      |                                                                                                                                                                                                          |       |
| 17 |                   |                      |                                                                                                                                                                                                          |       |
| 18 |                   |                      |                                                                                                                                                                                                          |       |
| 19 |                   |                      |                                                                                                                                                                                                          |       |
| 20 |                   |                      |                                                                                                                                                                                                          |       |
| 21 | Main results      | <a href="#">#16a</a> | Give unadjusted estimates and, if applicable, confounder-adjusted estimates and their precision (eg, 95% confidence interval). Make clear which confounders were adjusted for and why they were included | 9-10  |
| 22 |                   |                      |                                                                                                                                                                                                          |       |
| 23 |                   |                      |                                                                                                                                                                                                          |       |
| 24 |                   |                      |                                                                                                                                                                                                          |       |
| 25 |                   |                      |                                                                                                                                                                                                          |       |
| 26 |                   |                      |                                                                                                                                                                                                          |       |
| 27 |                   |                      |                                                                                                                                                                                                          |       |
| 28 |                   |                      |                                                                                                                                                                                                          |       |
| 29 |                   |                      |                                                                                                                                                                                                          |       |
| 30 |                   |                      |                                                                                                                                                                                                          |       |
| 31 | Main results      | <a href="#">#16b</a> | Report category boundaries when continuous variables were categorized                                                                                                                                    | n/a   |
| 32 |                   |                      |                                                                                                                                                                                                          |       |
| 33 |                   |                      |                                                                                                                                                                                                          |       |
| 34 |                   |                      |                                                                                                                                                                                                          |       |
| 35 |                   |                      |                                                                                                                                                                                                          |       |
| 36 | Main results      | <a href="#">#16c</a> | If relevant, consider translating estimates of relative risk into absolute risk for a meaningful time period                                                                                             | n/a   |
| 37 |                   |                      |                                                                                                                                                                                                          |       |
| 38 |                   |                      |                                                                                                                                                                                                          |       |
| 39 |                   |                      |                                                                                                                                                                                                          |       |
| 40 |                   |                      |                                                                                                                                                                                                          |       |
| 41 |                   |                      |                                                                                                                                                                                                          |       |
| 42 | Other analyses    | <a href="#">#17</a>  | Report other analyses done—e.g., analyses of subgroups and interactions, and sensitivity analyses                                                                                                        | n/a   |
| 43 |                   |                      |                                                                                                                                                                                                          |       |
| 44 |                   |                      |                                                                                                                                                                                                          |       |
| 45 |                   |                      |                                                                                                                                                                                                          |       |
| 46 |                   |                      |                                                                                                                                                                                                          |       |
| 47 | <b>Discussion</b> |                      |                                                                                                                                                                                                          |       |
| 48 |                   |                      |                                                                                                                                                                                                          |       |
| 49 |                   |                      |                                                                                                                                                                                                          |       |
| 50 | Key results       | <a href="#">#18</a>  | Summarise key results with reference to study objectives                                                                                                                                                 | 10-12 |
| 51 |                   |                      |                                                                                                                                                                                                          |       |
| 52 |                   |                      |                                                                                                                                                                                                          |       |
| 53 | Limitations       | <a href="#">#19</a>  | Discuss limitations of the study, taking into account sources of potential bias or imprecision. Discuss both direction and magnitude of any potential bias.                                              | 13-15 |
| 54 |                   |                      |                                                                                                                                                                                                          |       |
| 55 |                   |                      |                                                                                                                                                                                                          |       |
| 56 |                   |                      |                                                                                                                                                                                                          |       |
| 57 |                   |                      |                                                                                                                                                                                                          |       |
| 58 |                   |                      |                                                                                                                                                                                                          |       |
| 59 |                   |                      |                                                                                                                                                                                                          |       |
| 60 |                   |                      |                                                                                                                                                                                                          |       |

|    |                          |                     |                                                                      |       |
|----|--------------------------|---------------------|----------------------------------------------------------------------|-------|
| 1  | Interpretation           | <a href="#">#20</a> | Give a cautious overall interpretation considering objectives,       | 10-15 |
| 2  |                          |                     | limitations, multiplicity of analyses, results from similar studies, |       |
| 3  |                          |                     | and other relevant evidence.                                         |       |
| 4  |                          |                     |                                                                      |       |
| 5  |                          |                     |                                                                      |       |
| 6  |                          |                     |                                                                      |       |
| 7  |                          |                     |                                                                      |       |
| 8  |                          |                     |                                                                      |       |
| 9  | Generalisability         | <a href="#">#21</a> | Discuss the generalisability (external validity) of the study        | 15    |
| 10 |                          |                     | results                                                              |       |
| 11 |                          |                     |                                                                      |       |
| 12 |                          |                     |                                                                      |       |
| 13 |                          |                     |                                                                      |       |
| 14 | <b>Other Information</b> |                     |                                                                      |       |
| 15 |                          |                     |                                                                      |       |
| 16 |                          |                     |                                                                      |       |
| 17 | Funding                  | <a href="#">#22</a> | Give the source of funding and the role of the funders for the       | n/a   |
| 18 |                          |                     | present study and, if applicable, for the original study on which    |       |
| 19 |                          |                     | the present article is based                                         |       |
| 20 |                          |                     |                                                                      |       |
| 21 |                          |                     |                                                                      |       |
| 22 |                          |                     |                                                                      |       |
| 23 |                          |                     |                                                                      |       |
| 24 |                          |                     |                                                                      |       |

25 The STROBE checklist is distributed under the terms of the Creative Commons Attribution License  
26 CC-BY. This checklist was completed on 20. September 2021 using <https://www.goodreports.org/>, a  
27 tool made by the [EQUATOR Network](#) in collaboration with [Penelope.ai](#)  
28  
29  
30  
31  
32  
33  
34  
35  
36  
37  
38  
39  
40  
41  
42  
43  
44  
45  
46  
47  
48  
49  
50  
51  
52  
53  
54  
55  
56  
57  
58  
59  
60
